# Supplementary material for: A peptide encoded by a highly conserved gene belonging to the genus Streptomyces shows antimicrobial activity against plant pathogens
Source: Front Plant Sci. 2023 Oct 5;14:1250906. doi: 10.3389/fpls.2023.1250906 (PMC10585065; doi:10.3389/fpls.2023.1250906)
Supplement: Supplementary file 1 [file Table_1.xlsx]

## Sheet: TableS1
Table S1. List of 47 clusters obtained from mcl analysis of 125 IPG sequences (provided as a separate file).
Cluster	SubCluster	Sequences	CosensusAA	LenAA	ConsensusNT	LenNT	Description
Cluster01	Cluster01	WP_003967346.1,WP_005315736.1,WP_004929928.1,WP_003949956.1,WP_003986833.1,WP_004986573.1,WP_003984261.1,WP_003967102.1,WP_003948780.1,WP_003992177.1,WP_003978336.1,WP_004984723.1,WP_003974443.1,WP_003964323.1,WP_007383480.1,WP_003969786.1,WP_015607926.1,WP_003947520.1	MATGTVKWFNAEKGFGFIAQDGGGpDVFVHYSAIxxxGFRSLEEGQRVSFDVTQGQKGPQAENVxPAxx	69	ATGGCTACnGGAACCGTCAAGTGGTTCAACGCGGAAAAGGGCTTCGGCTTCATCGCGCAGGAnGGCGGCGGCGCGGATGTCTTCGTCCACTACTCCGCGATCnACACGnACGGCTTCCGCnCCCTCGAGGAGGGCCAGCnGGTnnACTTCGACGTCACGCAGGGCCAGAAGGGCCCGCAGGCGGAGAACGTCAnnnnnnCCCCCGCCTGA	210	cold-shock protein
Cluster02	Cluster02A	WP_003968728.1,WP_014046372.1,WP_004952403.1,WP_003975777.1,WP_003983763.1,WP_003950432.1	MTELFQQLLVEDADEELGWQERALCAQTDPESFFPEKGGSTREAKKVCLACEVRSECLEYALANDERFGIWGGLSERERRRLKKAAV	87	ATGACCGAGCTGTTCCAGCAACTGCTGGTCGAnGACGCGGACGAGGAACTCGGCTGGCAGGAGCGCGCnCTGTGCGCCCAGACCGACCCCGAGTCCTTCTTCCCCGAGAAGGGCGGCTCCACCCGCGAGGCCAAGAAGGTCTGCCTCGCCTGCGAGGTCCGCTCCGAnTGCCTCGAGTACGCCCTCGCCAACGACGAGCGCTTCGGCATCTGGGGCGGnCTGTCCGAGCGnGAGCGCCGCCGCCTGAAGAAGGCCGCCGTCTGA	264	WhiB family transcriptional regulator
Cluster02	Cluster02B	WP_003983230.1,WP_003973730.1,WP_004937597.1,WP_003953983.1,WP_016639615.1,WP_003950777.1,WP_003992873.1	MDWRHNAVCREEDPELFFPIGNTGPALLQIEEAKAVCRRCPVMEQCLQWALESGQDSGVWGGLSEDERRAMKRRAARNRARNASA	85	ATGGACTGGCGTCACAACGCCGTTTGCCGCGAGGAAGACCCCGAGCTCTTCTTCCCCATCGGCAACACCGGTCCTGCGCTGCTGCAGATCGAGGAAGCCAAGGCCGTCTGCCGnCGCTGCCCCGTCATGGAGCAGTGCCTGCAGTGGGCGCTCGAGTCCGGCCAGGACTCCGGCGTCTGGGGTGGCCTCAGCGAGGACGAGCGCCGCGCnATGAAGCGCCGCGCCGCnCGCAACCGGGCGCGnnACGCCAnCGCCTGA	258	WhiB family transcriptional regulator
Cluster03	Cluster03	WP_005319902.1,WP_003982715.1,WP_003977348.1,WP_003970369.1,WP_004948662.1,WP_003988945.1	MSSSITAPEGIINPPIDELLEATDSKYSLVIYAAKRARQINAYYSQLGEGLLEYVGPLVDTHVHEKPLSIALREINAGLLTSEAIEGPAQ	90	GTGTCCTCTTCCATCACCGCGCCCGAGGGCATCATCAACCCGCCGATCGACGAGCTCCTCGAGGCCACCGACTCGAAGTACAGCCTCGTGATCTACGCGGCCAAGCGCGCCCGCCAGATCAACGCGTACTACTCGCAGCTCGGCGAGGGCCTCCTCGAGTACGTCGGTCCGCTCGTCGACACCCACGTCCACGAGAAGCCGCTCTCGATCGCnCTnCGCGAGATCAACGCGGGTCTGCTGACCTCCGAGGCCATCGAGGGCCCGGCGCAGTAn	273	DNA-directed RNA polymerase subunit omega
Cluster04	Cluster04	WP_003965959.1,WP_003980229.1,WP_005311361.1,WP_003951123.1,WP_003973401.1,WP_005479813.1	MLEEALEHLVKGIVDNPDDVQVASRNLRRGRVLEVRVHPDDLGKVIGRNGRTARALRTVVGAIGGRGIRVDLVDVDQVR	79	ATGCTCGAGGAGGCTCTCGAGCACCTCGTGAAGGGCATCGTCGACAACCCCGACGAnGTGCAGGTCGCCTCGCGCAACCTGCGCCGCGGGCGCGTGCTGGAGGTCCGGGTCCACCCCGACGACCTCGGCAAGGTGATCGGCCGCAACGGCCGCACCGCnCGCGCnCTGCGnACCGTCGTGGGCGCCATCGGCGGCCGnGGnnTCCGCGTCGACCTCGTCGACGTGGACCAnGTCCGCTGA	240	RNA-binding protein
Cluster05	Cluster05	WP_003966094.1,WP_015036350.1,WP_006130840.1,WP_003951011.1,WP_003973500.1	MPGITREEVAHLARLARLELKxEELDHFAGQLDDIIGAVARVSEVADQDVPPTSHPLPLTNVMRADEVRPSLTPEQALSGAPAQEQQRFKVPQILGED	98	ATGCCTGGCATCACGCGCGAGGAGGTCGCCCACCTCGCCCGGCTGGCGCGTCTGGAGCTGAAGGnCGAAGAGCTCGAnCACTTCGCCGGnCAGCTCGACGACATCATCGGCGCGGTCGCCCGCGTCTCCGAGGTCGCCGACCAAGACGTACCGCCGACCTCCCACCCGCTGCCGCTGACnAACGTCATGCGCGCGGACGAGGTCCGTCCGTCGCTCACCCCCGnGCAGGCGCTCTCCGGCGCCCCGGCCCAGGAGCAGCAGCGTTTCAAGGTGCCGCAGATCCTGGGGGAGGACTAA	297	Asp-tRNA(Asn)/Glu-tRNA(Gln) amidotransferase subunit GatC
Cluster06	Cluster06	WP_003955420.1,WP_003999914.1,WP_003967677.1,WP_003949502.1,WP_004943146.1	MIFKRIGNGRPYPDHGRESTRQWADVAPRPVRLDQLVTTKGQLDLETLLAEDSTFYGDLFAHVVKWQGDLYLEDGLHRAVRAALQQRQVLHARVLELD	98	GTGATCTTCAAGCGCATCGGAAACGGCCGGCCGTACCCCGACCACGGCCGGGAAAGCACCCGGCAGTGGGCGGACGTCGCGCCGCGCCCGGTCCGCCTCGATCAGCTCGTGACnACCAAGGGCCAGCTCGACCTGGAGACCCTCCTCGCCGAGGACTCCACGTTCTACGGCGACCTCTTCGCGCACGTCGTGAAGTGGCAGGGCGACCTnTACCTGGAGGACGGnCTGCACCGCGCGGTnCGCGCCGCGCTCCAGCAGCGCCAGGTGCTGCACGCCCGCGTCCTCGAACTGGACTGA	297	type II toxin-antitoxin system VapB family antitoxin
Cluster07	Cluster07A	WP_003977410.1,WP_003946963.1,WP_003970432.1	MILSISGVVLLGIVVFLFFRKDGLKASHAIVCALFGFYLAGTAIAPSITAGGASLAGLLGGIKF	64	ATGATCCTnTCCATCTCnGGCGTGGTCCTGCTCGGCATCGTCGTCTTCCTGTTCTTCCGGAAGGACGGCCTCAAGGCGTCnCACGCCnTnGTCTGCGCnCTGTTCGGCTTCTACCTGGCnGGCACCGCCATCGCCCCGAGCATCACGGCGGGCGGCGCGAGCCTCGCCGGCCTGCTCGGCGGGATCAAGTTCTGA	195	hypothetical protein
Cluster07	Cluster07B	WP_003950656.1,WP_003948050.1	MALSISaVVLLlIVVVLLIRksgLKSahALVcVLlGFYLASSsVgPmIgdftsNVAgmIgGIkF	64	GTGGCCnTnTCnCTGTCCGnGGTGGTGCTGnTGnCGATCGTCnTnGTCnTCCTCATCCGGGGCGnCnCnCTCAAGGCCGnnCCCGCCnTGGTnGCCnTCCTGnTCGGCTTCTTCCTCGCCTCCnnnGnCnTGGCCCCCGCGATCCnGCGCGTCCnCGnCTCnnTnGCGCnnACCGTCnGCGGCATCAGCTTCTGA	195	hypothetical protein
Cluster08	Cluster08	WP_003951337.1,WP_005481602.1,WP_003993510.1,WP_003965732.1	MATDYDTPRKTDDDVDsDSLEELKARRNDKStSAVDVDEFEAAEGLELPGADLSNEELAVRVLPKQQDEFTCMSCFLVHHRSQLAREKNGQPICRDCD	98	ATGGCAACGGATTACGACACCCCACGCAAGACCGACGACGACGTCGACTCGGACAGCCTCGAAGAGCTGAAGGCCCGGCGGAACGACAAGTCGGCCTCCGCCGTCGACGTCGACGAGTTCGAGGCCGCCGAGGGCCTCGAGCTGCCCGGCGCGGACCTCTCCAACGAGGAGCTGGCCGTCCGGGTGCTGCCCAAGCAGCnGGACGAGTTCACCTGCATGAGCTGCTTCCTGGTGCACCACCGCAGCCAGCTGGCCCGCGAGAAGAACGGCCAGCCGATCTGCCGCGACTGCGACTGA	297	DUF4193 domain-containing protein
Cluster09	Cluster09	WP_003950507.1,WP_003990598.1,WP_007382399.1,WP_003968811.1	MNRSELVAALADRAEVTRKDADAVLAAFAEtVGDIVSKGDEKVTIPGFLTFERTHRAARTARNPQTGDPIQIPAGYSVKVSAGSKLKEAAKGK	93	ATGAACCGCAGTGAGCTGGTGGCCGCCCTGGCCGACCGCGCCGAGGTGACCCGCAAGGACGCCGACGCCGTGCTGGCCGCGnTCGCCGAGnCCGTCGGCGAGATCGTCGCCAAGGGCGACGAGAAGGTCACCATCCCCGGCTTCCTGACCTTCGAGCGCACCCACCGTGCCGCTCGCACCGCnCGCAACCCGCAGACCGGCGACCCGATCCAGATCCCGGCCGGCTACAGCGTGAAGGTCTCCGCGGGCTCnAAGCTCAAGGAAGCCGCCAAGGGCAAGTAA	282	HU family DNA-binding protein
Cluster10	Cluster10	WP_003947402.1,WP_006123601.1,WP_004002281.1,WP_003976983.1	MAETLKKGSRVTGAARDKLAADLKKKYDSGASIRALAEETGRSYGFVHRMLSESGVTLRGRGGATRGKKAASA	73	GTGGCCGAGACTCTGAAGAAGGGCAGCCGGGTGACCGGCGCCGCGCGCGACAAGCTCGCGGCAGACCTGAAGAAGAAGTACGACTCCGGTGCGAGCATCCGGGCGCTGGCCGAGGAAACCGGCCGCTCCTACGGnTTCGTCCACCGGATGCTCAGCGAGTCCGGnGTCACGCTGCGnGGnCGnGGCGGnGCGACnCGGGGCAAGAAGGCCGCnTCGGCCTGA	222	hypothetical protein(1), transcriptional regulator(3)
Cluster11	Cluster11	WP_003974374.1,WP_004927567.1,WP_003948727.1	MNPVNYLYLAALLFTIGATGVLIRRNAIVVFMCVELMLNACNLAFVAFSRMHGNLDGQIIAFFTMVVAAAEVVVGLAIIVSLFRSRHSASVDDASLMKL	99	GTGAACCCCGTCAACTACCTCTACCTCGCGGCCCTGCTGTTCACGATCGGCGCCACCGGnGTGCTGATCCGGCGCAACGCGATCGTCGTCTTCATGTGCGTCGAGCTGATGCTCAACGCCTGCAACCTCGCGTTCGTCGCCTTCTCCCGCATGCACGGCAACCTCGACGGCCAGATCATCGCCTTCTTCACGATGGTCGTCGCCGCCGCGGAGGTCGTGGTCGGGCTCGCGATCATCGTGTCnCTGTTCCGTTCCCGCCACTCGGCCTCGGTCGACGACGCCAGCCTGATGAAGCTGTnA	300	NADH-quinone oxidoreductase subunit NuoK
Cluster12	Cluster12	WP_003968135.1,WP_003949043.1,WP_004986406.1	MCGAKAGGPDASTIKPGETTIQGSVTRDGEPVTGYVRLLDSTGEFTAEVPTSATGQFRFYAAEGTWTLRALVPGGSADRTVVAQQGGLAEVAIAV	95	ATGTGTGGAGCACAGGCCGGCGGCCCCGACGCCTCGACGATCAAGCCCGGTGAGACCACCATCCAGGGCAGCGTGACCCGCGACGGCGAGCCCGTCACCGGCTACGTGCGnCTGCTGGACTCGACCGGCGAGTTCACCGCCGAGGTCCCGACCTCGGCGACCGGnCAGTTCCGCTTCTACGCCGCCGAGGGCACCTGGACGCTCCGCGCCCTGGTnCCGGGCGGCAnCGCCGACCGCACGGTCGTCGCnCAGnCCGGCGGnCTCnCCGAGGTCGCCATCGCCGTCTGA	288	DUF1416 domain-containing protein
Cluster13	Cluster13A	WP_003947485.1,WP_010058136.1	mdrSpIYSGMPArELGTsGWrKPWSGGNGGNCVEAMRLdDGRVAVRQSADPDGPALIYTHGEISAFIQGAKtGKADFLIS	80	ATGnAnnnnnnCCnCATATACAnCGGCATGCCnGCCnGnGACCTCGGCTCCGnnGGCTGGnnCAAGCCnTGGAGCGGCGGCAACGGCGGCAACTGCnTCGAGGCCATGnnGCTCGCCGACGGGCGnGTCGCCGTnCGCCAGTCCGCCGACCCGGACGGCCCCGCnCTCATCTACTCCnACGGCGAGATCGCCGCnTTCATCCAGGGCGCCAAGGCCGGCCAGGCCGACTTCCTGCTCACCTGA	243	DUF397 domain-containing protein
Cluster13	Cluster13B	WP_008410190.1	MGTQQEKDELYALDISGVEWISAPGAEEHEERVEIAYLPGGGVAMRSSLDPDTVLRYTEAEWRAFVLGARDGEFDLK	77	ATGGGGACTCAGCAGGAGAAGGACGAGCTGTACGCGCTGGACATCTCGGGTGTCGAGTGGATCAGCGCGCCCGGGGCTGAGGAGCACGAGGAGCGGGTCGAGATCGCCTACCTGCCCGGCGGCGGCGTCGCCATGCGCTCCTCGCTCGACCCGGACACGGTCCTGCGCTACACCGAGGCCGAGTGGCGCGCCTTCGTCCTGGGGGCGCGGGACGGGGAGTTCGACCTCAAGTGA	234	DUF397 domain-containing protein
Cluster14	Cluster14	WP_003969224.1,WP_003976229.1,WP_006136074.1	MGAHRRKCDWCGSGTPIVRDMEPVNPDYQYWCEECARALIIKGDPIETYRELEGEPIYGRLLEEHCTLKRFYSFVTA	77	ATGGGTGCACACAGGCGnAAGTGCGACTGGTGCGGCAGCGGnACGCCnATCGTCCGnGACATGGAGCCGGTCAACCCCGACTACCAGTACTGGTGCGAGGAATGCGCGCGGGCGCTGATCATAAAAGGCGACCCCATCGAGACnTACCGnGAGCTGGAGGGCGAGCCGATCTACGGCCGGCTCCTnGAGGAGCACTGCACGCTCAAGCGnTTCTACTCnTTCGTGACnGCCTGA	234	hypothetical protein
Cluster15	Cluster15	WP_003948620.1,WP_004927214.1,WP_003956442.1	MAKKQGAIEIEGTVVESLPNAMFKVELQNGHQVLAHISGKMRMHYIRILPDDRVVVELSPYDLTRGRIVYRYK	73	GTGGCCAAGAAGCAAGGTGCCATCGAGATCGAGGGCACCGTCGTCGAGTCTCTnCCGAACGCCATGTTCAAGGTGGAGCTCCAGAACGGnCACCAGGTCCTnGCGCACATCAGCGGCAAGATGCGnATGCACTACATCCGCATCCTCCCnGACGACCGGGTCGTGGTGGAGCTGTCTCCGTACGACCTGACGCGTGGCCGGATCGTCTACCGCTACAAGTAG	222	translation initiation factor IF-1
Cluster16	Cluster16	WP_003966321.1,WP_003992906.1,WP_003961784.1	MYFTDRGIEELEKRRGEEEVTFEWLAEQLRTFVDLNPDFEVPVERLATWLARLDDEDDEDx	61	ATGTACTTCACCGACCGnGGCATCGAGGAnCTGGAGAAGCGGCGCGGCGAGGAGGAGGTCACCTTCGAGTGGCTCGCCGAGCAGCTGCGgACGTTCGTCGACCTCAACCCCGACTTCGAGGTGCCGGTnGAGCGCCTGGCGACCTGGCTGGCCCGGCTGGACGACGAGGACGnnnAGGACGAGTAG	186	hypothetical protein
Cluster17	Cluster17	WP_006123846.1,WP_003947575.1	MgValDVVYIALMCFLIVLIFRLVMDYVFQFARSWQPGKAMVVVLEATYTVTDPPLKLLRRFIPPLRLGGVALDLSFFVLMIIVYILISVVvrL	94	ATGGGCGTCGCnCTGGATGTGGTCTAnATCGCGCTGATGTGTTTCCTCATCGTGCTGATCTTCCGGCTGGTCATGGACTACGTCTTCCAGTTCGCnCGnTCnTGGCAACCCGGCAAGGCGATGGTGGTnGTACTTGAGGCCACCTACACTGTCACCGAnCCACCGCTCAAGCTTCTGCGGCGGTTCATCCCGCCGCTGCGTCTCGGGGGCGTGGCnCTCGACCTGTCCTTCTTCGTTCTGATGATCATCGTCTACATCCTGATCAGCGTnGTGGTCnGGnTGTGA	285	YggT family protein
Cluster18	Cluster18	WP_003947636.1,WP_003969641.1	MITAIVLIKTSVDRIPEIAEAIAALDNVSEVFSVTGTYDLIAMVRVpRHDDLADVIPGRISKIeGVEGTDTHVAFRTYSQHDLEAAFAIGLDS	93	GTGATCACCGCGATCGTGCTCATCAAGACCAGCGTGGACCGGATTCCGGAGATCGCCGAGGCCATCGCCGCGCTGGACAGCGTCAGCGAGGTCTTCTCCGTCACCGGCACCTACGACCTGATCGCCATGGTCCGGGTCGCCCGCCACGACGACCTCGCCGACGTCATCCCCGGCCGGATCAGCAAGATCCCGGGCGTCGAGGGCACCGACACCCAnGTGGCGTTCCGnACGTACTCCCAGCACGACCTGGAnGCGGCnTTCGCCATCGGCCTCGACGCnTGA	282	Lrp/AsnC ligand binding domain-containing protein
Cluster19	Cluster19	WP_003997603.1,WP_006127869.1	MVQAYILIQTEVGKAStVAETISKIPGVIQAEDVTGPYDVIVRAQADTVDDLGRMVVAKVQQVDGITRTLTCPVVHL	77	GTGGTACAGGCGTACATCCTCATCCAGACCGAGGTnGGCAAGGCGTCGAnCGTCGCCGAGACCATCTCCAAGATnCCGGGAGTCATCCAGGCnGAGGACGTCACCGGnCCGTACGACGTGATCGTGCGGGCCCAGGCnGACACGGTCGACGAnCTCGGCCGCATGGTGGTCGCCAAGGTCCAGCAGGTGGACGGCATCACnCGnACCCTGACCTGCCCGGTCGTCCACCTCTGn	234	Lrp/AsnC ligand binding domain-containing protein
Cluster20	Cluster20	WP_003968990.1,WP_003948191.1	MLERRSSHDDLIDHLVRSTaLqRGEAaRVILDVLAYFDESTDDfVRRRHRELQSgGLvNTEIFERIAaELPhRAVAPPeLSLRQLRRIVYG	91	GTGCTnGAACGCCGCTCGTCnCACGACGACCTCnTCGACCACCTCGTnCGCTCCACCGCGCTCCnGCGCGGCGAGGCGGCCCGGGTGnTCCTCGACGTGCTGGCGTACTTCGACGAGAGCACCGACGACTTCGTCCGnCGCCGCCACCGCGAACTGCAGTCCGGCGGCCTGGTCAACACGGAGATCTTCGAGCGGATCGCGGCCGAGCTGCCGCnCCGCGCCGTGGCGCCGCCGGnGCTCTCGCTCCGCCAGCTGCGCCGCATCGTCTACGGCTGA	276	hypothetical protein
Cluster21	Cluster21	WP_003969643.1,WP_003947634.1	mtTVPlPTdsTRWRCTLCGNLTRFDVTRSSKVVEYVHLDLAGesSVEErEVVSETIESVRCRWCNAVDQIELVDRPGAaS	80	ATGACGACGGTTCCCCTGCCGACCGnCTCGACCCGCTGGCGCTGCACCCTGTGCGGCAACCTCACGCGCTTCGACGTGACCCGCTCCTCCAAGGTCGTGGAGTACGTnCACCTCGACCTGGCCGGTGAGTCGAGTGTCGAGGAGCGGGAGGTCGTCAGTGAGACCATCGAGTCGGTCCGCTGTCGTTGGTGCAACGCGGTGGACCAGATCGAACTGGTGGACAGGCCGGGnGCCGCnTCCTGA	243	hypothetical protein
Cluster22	Cluster22	WP_003973418.1,WP_003951107.1	MAKALLGYVGGSDPRLLAEMRRLQQRVQDLESELgRIQAENDALAAAASHdrimesMESVDahQAEPALT	70	ATGGCAAAGGCGCTTCTCGGTTACGTCGGCGGnTCCGACCCGCGGCTCCTCGCCGAGATGCGACGGCTCCAGCAGCGCGTCCAGGACCTCGAATCCGAGnTCGnTCGGATCCAGGCCGAGAACGACGCGCTCGCGGCTGCCGCTTCTCACCACAGCGnCnnnGCGCnCCTCGACAGCCTCGACGnAnCCnAGGCGGAGCCTGCGCTCACCTGA	213	hypothetical protein
Cluster23	Cluster23	WP_003947232.1,WP_005485166.1	MPEYEFtDVYVPRGITRtDtTRLLTDHAEYGHWELDRLvLLpDGSRRVRLRRRIIRQLRATW	62	ATGCCGGAATACGAATTnGnCGACGTGTACGTnCCGCGCGGGGTCTCCCGCAnGGACGCCACnCGCCTGCTnACnGACCAnGCCGAGTACGGnCACTGGGAGnTGGACCGnCTGnGnCTGCTGCGnGACGGCAGCCGCAGGGTGCGGCTGCGnCGGCGGATCATCCGCCAGGTGCGGGCCACCTGGTGA	189	hypothetical protein
Cluster24	Cluster24	WP_003975360.1,WP_003967454.1	MTKWEYATVPLLVHATKQILDTWGEDGWELVQVVPGPNNPEQLVAYLKREKqa	53	ATGACCAAGTGGGAATACGCGACCGTGCCGCTGCTCGTnCACGCGACGAAGCAGATTCTGGACACCTGGGGCGAGGACGGCTGGGAGCTCGTCCAGGTCGTGCCCGGnCCGAACAACCCCGAGCAGCTCGTGGCCTACCTGAAGCGGGAGAAGCAGGCGTGA	162	DUF4177 domain-containing protein
Cluster25	Cluster25	WP_003958712.1,WP_003999697.1	MKKLLLVALAAIGGLLVYRQIQADRAEQDLWTEATDSVPaGSgv	44	GTGAAGAAGCTTCTCCTGGTCGCACTGGCCGCCATCGGCGGGCTCCTCGTGTACCGCCAGATCCAGGCGGATCGCGCCGAGCAGGATCTGTGGACGGAGGCGACnGACTCCGTGCCCACGGGTTCnnnnnnGTGA	135	DLW-39 family protein
Cluster26	Cluster26	WP_004002138.1	MGEAERGESAPRLRISFWCSNGHETQPSFASDAQVPDTWDCPRCGFPAGQDRDNPPDPPRTEPYKTHLAYVRERRSDADGEAILAEALAKLRGEI	95	ATGGGCGAGGCCGAGCGCGGCGAGTCCGCnCCGCGGCTGCGCATCTCCTTCTGGTGCTCCAACGGGCACGAGACCCAGCCGAGCTTCGCCAGCGACGCGCAGGTCCCCGACACCTGGGACTGCCCGCGCTGCGGCTTCCCGGCCGGnCAGGACCGGGACAACCCGCCGGACCCGCCGCGCACCGAGCCnTACAAGACGCACCTCGCGTACGTnCGnGAGCGGCGCAGCGACGCGGACGGCGAGGCGATCCTCGCCGAGGCGCTCGCCAAACTGCGGGGCGAGATCTAG	288	RNA polymerase-binding protein RbpA
Cluster27	Cluster27	WP_003948664.1	MTDAVGSIDMPDAQDDDGKKKNRKGGKRGKKGPFGRLALFYRQIVAELRKVVWPTRSQLTTYTTVVIIFVVIMIGLVTVFDYGFSNAVKYIFG	93	GTGACGGACGCCGTGGGCTCCATCGACATGCCTGATGCCCAGGACGACGACGGCAAGAAGAAGAACCGCAAGGGCGGCAAGCGCGGCAAGAAGGGCCCCTTCGGGCGCCTTGCCCTCTTCTACCGGCAGATCGTCGCCGAACTCCGCAAGGTCGTCTGGCCGACGCGCAGTCAGCTCACCACCTATACGACGGTGGTCATCATCTTCGTCGTGATCATGATCGGTCTGGTGACCGTGTTTGACTACGGCTTCTCCAACGCCGTCAAGTACATCTTCGGCTAG	282	preprotein translocase subunit SecE
Cluster28	Cluster28	WP_003946983.1	MSKKTFEELFTELQQKAAHGDPTTSRTAELVDKGVHAIGKKVVEEAAEVWMAAEYEGKEAAAEEISQLLYHVQVMMVARGISLDDVYAHL	90	ATGTCCAAGAAGACGTTCGAGGAGCTCTTCACCGAGCTCCAGCAGAAGGCCGCGCACGGCGACCCCACCACCTCCCGCACCGCCGAACTGGTGGACAAGGGCGTCCATGCCATCGGCAAGAAGGTCGTCGAAGAGGCCGCCGAGGTGTGGATGGCCGCCGAGTACGAGGGCAAGGAAGCCGCCGCCGAGGAGATCTCCCAGCTCCTGTACCACGTACAGGTGATGATGGTCGCCCGCGGCATCTCCCTCGACGACGTGTACGCCCATCTCTGA	273	phosphoribosyl-ATP diphosphatase
Cluster29	Cluster29	WP_003948677.1	MGIISWIILGLLAGAIAKIILPGRDPGGFIGTILIGVAGAFIGGWISSRFLDRPIANEFFDAATWVSAIGGSLVLLIAYRLLFGHSRR	88	ATGGGCATCATCAGCTGGATCATTCTCGGCCTGCTGGCCGGAGCAATCGCGAAGATCATCCTCCCCGGGCGCGACCCGGGCGGTTTCATCGGCACCATCCTCATCGGCGTCGCGGGCGCCTTCATCGGCGGCTGGATATCCAGCCGCTTCCTGGACCGCCCCATCGCCAACGAGTTCTTCGACGCCGCCACCTGGGTCTCCGCCATCGGCGGCTCCCTGGTGCTGCTCATCGCCTACCGnCTGCTCTTCGGCCATTCCCGnCGCTGA	267	GlsB/YeaQ/YmgE family stress response membrane protein
Cluster30	Cluster30	WP_008409915.1	MSGTVTMYSTTWCGYCRRLKSQMDREGIAYEEVNIEHDPESAAFVEKANGGNQTVPTLQIVPKAGGEPVVMTNPSLAQVKQALGA	85	ATGTCGGGCACTGTGACGATGTACAGCACCACCTGGTGCGGATACTGCCGTCGGCTGAAGAGCCAGATGGACCGCGAGGGCATCGCGTACGAAGAGGTCAACATCGAGCACGACCCGGAGTCGGCCGCGTTCGTGGAGAAGGCGAACGGCGGGAACCAGACCGTGCCGACGCTGCAGATCGTCCCCAAGGCCGGCGGTGAGCCGGTGGTGATGACCAACCCGAGCCTGGCTCAGGTCAAGCAGGCGCTCGGCGCCTGA	258	mycoredoxin
Cluster31	Cluster31	WP_008409760.1	MARVVVDVMLKPEILDPQGQAVQRALPRLGFEGISDVRQGKRFELEVDGPVDDAALARIHELAETFLANTVIENFTVKVEEEK	83	GTGGCACGCGTCGTAGTCGACGTCATGCTCAAGCCGGAGATCCTCGACCCTCAGGGCCAGGCGGTGCAGCGTGCACTGCCGCGTCTCGGCTTCGAGGGAATCTCCGACGTACGTCAGGGAAAGCGTTTCGAACTCGAAGTGGACGGGCCGGTGGACGACGCCGCTCTCGCCCGTATCCACGAACTGGCGGAGACCTTCCTCGCCAACACCGTGATCGAGAACTTCACCGTGAAGGTCGAGGAAGAGAAGTGA	252	phosphoribosylformylglycinamidine synthase subunit PurS
Cluster32	Cluster32	WP_008409756.1	MGRGRAKAKQTKVARQLKYNSGGTDLSRLASELGASTSSQPPNGEPFEDDEDEDPYAQYADLYNDDEDEDDESGPASKQRRGA	83	ATGGGGCGCGGCCGGGCCAAGGCCAAGCAGACAAAGGTCGCCCGCCAGCTGAAGTACAACAGCGGCGGGACTGACCTGTCGCGTCTGGCCAGCGAGCTGGGCGCATCGACTTCGAGTCAGCCTCCGAACGGCGAGCCGTTCGAGGACGACGAGGACGAGGACCCGTACGCACAGTACGCGGACTTGTACAACGACGACGAGGACGAGGACGACGAGTCCGGTCCCGCGTCGAAGCAACGCCGCGGCGCTTGA	252	DUF3073 domain-containing protein
Cluster33	Cluster33	WP_003950786.1	MAGFLDRAKEQAQRGLAQGKQKIDEVQVQRAGADLLKKLGSAYYAEQRRGGDPRATQDALRALEQHIATHGEQGLR	76	ATGGCTGGATTCCTCGACCGCGCCAAGGAGCAGGCCCAGCGCGGCCTCGCCCAGGGCAAGCAGAAGATCGACGAGGTGCAGGTGCAGCGGGCCGGTGCCGACCTGCTGAAGAAGCTGGGCTCCGCGTACTACGCCGAGCAGCGGCGGGGCGGCGACCCGCGTGCCACCCAGGACGCCCTGCGCGCCCTGGAGCAGCACATCGCCACCCACGGGGAGCAGGGGCTGCGCTGA	231	hypothetical protein
Cluster34	Cluster34	WP_003969918.1	MKQSAGSRRHLPSSPFNRPAQEAPPVECFDVGDRVSHDQFGLGRILAVEGDNDAVLIDFSGRQGRILSPYSKLTKL	76	ATGAAACAGTCAGCCGGnTCCCGGCGTCACCTGCCGTCCAGTCCCTTCAACCGCCCGGCCCAGGAGGCCCCACCGGTCGAATGCTTCGATGTGGGCGACAGGGTGTCGCACGACCAGTTCGGACTCGGCAGGATTCTCGCTGTCGAGGGCGACAACGACGCGGTCCTCATCGACTTCTCGGGGCGCCAGGGAAGGATCCTGAGCCCCTACTCCAAGCTGACCAAGCTCTGA	231	hypothetical protein
Cluster35	Cluster35	WP_003951302.1	MTTVLTPATPLTAADRCDRCGAQAYLRVVLMSGGELLFCAHHGRKFEPELKKIAAEIQDESERLTATPATAEDER	75	GTGACTACTGTTCTGACCCCCGCGACCCCCCTGACGGCCGCTGACCGCTGTGACCGCTGCGGCGCCCAGGCCTACCTGCGCGTCGTGCTGATGAGCGGTGGTGAACTGCTCTTCTGCGCCCACCACGGCCGCAAGTTCGAGCCGGAACTCAAGAAGATCGCCGCTGAGATACAGGATGAGTCCGAGCGGCTGACGGCGACCCCGGCCACGGCCGAGGACGAGCGCTGA	228	hypothetical protein
Cluster36	Cluster36	WP_003947204.1	MAAKDSDGGQQKANRPAETTEEQTEDATVSEELKERQEALSDDVDSVLDEIDDVLEENAEDFVRGFVQKGGE	72	ATGGCGGCCAAGGACAGCGACGGCGGACAGCAGAAGGCGAATCGTCCGGCGGAAACGACCGAGGAGCAGACCGAGGACGCAACGGTCTCGGAGGAGCTCAAGGAGCGCCAGGAGGCGCTGAGCGACGACGTCGACTCCGTTCTCGACGAGATCGACGACGTCCTGGAGGAGAACGCCGAGGACTTCGTCCGCGGATTCGTGCAGAAGGGCGGCGAGTAG	219	ubiquitin-like protein Pup
Cluster37	Cluster37	WP_004984898.1	MAAAGERPLNEVQFLTVAEVASVMRVSKMTVYRLVHSGHLPAIRVGRSFRVPEQAVHEYLRESYVGVETA	70	ATGGCTGCAGCTGGCGAGAGGCCTCTGAACGAGGTTCAGTTCCTTACCGTGGCGGAAGTCGCCTCGGTGATGCGAGTGTCGAAGATGACCGTGTACCGGnTGGTGCACAGCGGTCATCTGCCCGCGATCCGGGTGGGGCGGTCCTTCCGCGTCCCGGAGCAAGCGGTTCACGAGTACCTCCGCGAGAGCTAnGTGGGGGTGGAAACnGCCTGA	213	helix-turn-helix domain-containing protein
Cluster38	Cluster38	WP_006127526.1	MTEATDLAARAGDRDPRVGLRAVAALRRLLEQLEAVQVRSARVQGWSWQEIAAELGVSRQAVHKKYGRR	69	ATGACCGAAGCAACGGATCTGGCCGCCCGCGCCGGTGACCGCGACCCGCGCGTCGGGCTGCGGGCGGTGGCCGCGCTGCGGCGGCTGCTGGAGCAGCTCGAAGCCGTGCAGGTGCGCAGTGCCCGCGTnCAGGGCTGGTCGTGGCAGGAGATCGCCGCCGAGCTGGGCGTCAGCCGGCAGGCCGTGCACAAGAAGTACGGGAGGCGTTGA	210	helix-turn-helix domain-containing protein
Cluster39	Cluster39	WP_003949541.1	MTARTPDAEPLLTPAEVATMFRVDPKTVTRWAKAGKLTSIRTLGGHRRYREAEVRALLAGIPQQRSEA	68	ATGACCGCTCGCACCCCTGATGCCGAGCCGCTGCTGACCCCGGCTGAGGTCGCCACGATGTTCCGCGTnGACCCGAAGACGGTCACGCGnTGGGCGAAGGCnGGCAAGCTCACGTCCATCCGCACGCTCGGCGGnCACCGCCGnTACCGCGAGGCnGAGGTCCGCGCACTGCTCGCGGGCATnCCGCAGCAGCGCAGCGAGGCCTGA	207	developmental transcriptional regulator BldC
Cluster40	Cluster40	WP_026048345.1	MTPKTELATLADEILELESETFEISDYSDAAEVVLAGSTSCSSTSTCSSTTSTTSCSA	58	ATGACCCCCAAGACCGAGCTGGCCACCCTCGCCGACGAGATCCTGGAGCTGGAGTCGGAGACCTTCGAGATCTCGGACTACTCGGACGCGGCCGAGGTCGTGCTCGCCGGTTCGACGTCCTGCTCCTCGACGTCGACCTGCTCCAGCACCACCAGCACCACCTCCTGCTCGGCCTGA	177	thiazolylpeptide-type bacteriocin
Cluster41	Cluster41	WP_008405281.1	MVPLLLVLLLAALLFGAGFALDILWWIAAIVIIVWVLGFVFRSAGAGGKRGRWYRW	56	ATGGTGCCCCTTCTTCTTGTTCTTCTGCTCGCCGCTCTTCTTTTCGGCGCGGGTTTCGCTCTCGACATCCTGTGGTGGATCGCGGCGATCGTGATCATCGTCTGGGTCCTGGGCTTCGTCTTCCGCTCCGCCGGTGCCGGTGGCAAGCGAGGCCGCTGGTACCGCTGGTGA	171	hypothetical protein
Cluster42	Cluster42	WP_003966491.1	MAAMKPRTGDGPLEVTKEGRGIVMRVPLEGGGRLVVELTPDEADALGDALKKVVG	55	ATGGCGGCCATGAAGCCGCGGACGGGCGACGGCCCGCTCGAGGTGACCAAGGAGGGGCGGGGCATCGTCATGCGCGTTCCGCTCGAAGGCGGCGGTCGGCTCGTCGTCGAGCTGACCCCGGACGAGGCCGACGCnCTCGGCGACGCCCTCAAGAAGGTCGTCGGCTGA	168	DUF3117 domain-containing protein
Cluster43	Cluster43	WP_003948845.1	MGSVIKKRRKRMAKKKHRKLLKRTRVQRRNKK	32	GTGGGCTCTGTTATCAAGAAGCGGCGCAAGCGGATGGCCAAGAAGAAGCACCGCAAGCTGCTCAAGCGCACGCGCGTTCAGCGTCGCAACAAGAAGTAA	99	AURKAIP1/COX24 domain-containing protein
Cluster44	Cluster44	WP_016434100.1	MTAENIVGLVVAVALLGYLVLALIFPERF	29	GTGACCGCCGAGAACATCGTCGGCCTCGTCGTGGCCGTCGCCCTGCTGGGCTATCTCGTCCTCGCCCTGATCTTCCCGGAGAGGTTCTGA	90	K(+)-transporting ATPase subunit F

## Sheet: TableS2
Table S2. List of 2,061 Streptomyces genomes and their genomic relatedness with the strain KPP03845
# assembly_accession	organism_name	infraspecific_name	OrthoANI	DDH	Model C.I.	Distance	Prob. DDH >= 70%
GCF_000725805.1	Streptomyces xanthophaeus	strain=NRRL B-5414	98.1599	83.5	[80.7 - 86%]	0.0193	92.92
GCF_000725725.1	Streptomyces xanthophaeus	strain=NRRL B-3004	98.1543	83.5	[80.7 - 86%]	0.0193	92.92
GCF_000720115.1	Streptomyces sp. NRRL F-2580	strain=NRRL F-2580	87.0276	32.9	[30.5 - 35.4%]	0.1275	0.32
GCF_001746425.1	Streptomyces subrutilus	strain=10-1-1	86.9054	32.7	[30.3 - 35.2%]	0.1282	0.31
GCF_008086975.1	Streptomyces sp. WAC05950	strain=WAC5950 substr. delta orf15 pCRISPomyces	86.8509	32.7	[30.3 - 35.2%]	0.1286	0.3
GCF_001270565.1	Streptomyces virginiae	strain=NRRL B-1447	86.7318	32.1	[29.6 - 34.6%]	0.1315	0.24
GCF_001279625.1	Streptomyces sp. WM6368	strain=WM6368	86.7272	32.2	[29.8 - 34.7%]	0.1309	0.25
GCF_002028385.1	Streptomyces sp. 3211	strain=3211	86.7129	32.2	[29.8 - 34.7%]	0.1309	0.25
GCF_014203435.1	Streptomyces sp. 3211.3	strain=3211.3	86.695	32.2	[29.8 - 34.7%]	0.1307	0.25
GCF_008642275.1	Streptomyces venezuelae	strain=ATCC 21018	86.6915	32.1	[29.7 - 34.6%]	0.1312	0.24
GCF_002080455.1	Streptomyces sp. Sge12	strain=Sge12	86.6734	32.2	[29.8 - 34.7%]	0.1308	0.25
GCF_014648615.1	Streptomyces nojiriensis	strain=JCM 3382	86.6598	32.3	[29.8 - 34.8%]	0.1306	0.26
GCF_014203415.1	Streptomyces sp. 3211.5	strain=3211.5	86.6523	32.2	[29.8 - 34.7%]	0.1307	0.25
GCF_001905445.1	Streptomyces sp. CB00455	strain=CB00455	86.619	32.2	[29.8 - 34.7%]	0.1308	0.25
GCF_000717925.1	Streptomyces sp. NRRL S-241	strain=NRRL S-241	86.5757	32.1	[29.7 - 34.6%]	0.1312	0.24
GCF_001279445.1	Streptomyces sp. WM6349	strain=WM6349	86.5629	31.9	[29.5 - 34.4%]	0.1324	0.22
GCF_000725555.1	Streptomyces erythrochromogenes	strain=NRRL B-2112	86.5362	32	[29.5 - 34.5%]	0.132	0.23
GCF_003949665.1	Streptomyces sp. WAC05950	strain=WAC05950	86.5357	31.9	[29.5 - 34.4%]	0.1321	0.23
GCF_014650695.1	Streptomyces avidinii	strain=JCM 4726	86.5355	32	[29.6 - 34.5%]	0.1316	0.24
GCF_000718935.1	Streptomyces sp. NRRL S-237	strain=NRRL S-237	86.5037	31.8	[29.4 - 34.3%]	0.1327	0.22
GCF_009865565.1	Streptomyces sp. SID1046	strain=SID1046	86.4896	31.8	[29.4 - 34.3%]	0.1326	0.22
GCF_001279485.1	Streptomyces sp. XY511	strain=XY511	86.4764	31.6	[29.2 - 34.1%]	0.1339	0.2
GCF_008704535.1	Streptomyces subrutilus	strain=ATCC 27467	86.4707	31.7	[29.3 - 34.2%]	0.1334	0.21
GCF_001279965.1	Streptomyces sp. MMG1064	strain=MMG1064	86.4399	31.6	[29.1 - 34.1%]	0.134	0.2
GCF_001279905.1	Streptomyces sp. XY66	strain=XY66	86.3878	31.5	[29.1 - 34%]	0.1344	0.19
GCF_001279855.1	Streptomyces sp. XY58	strain=XY58	86.3808	31.6	[29.2 - 34.1%]	0.1339	0.2
GCF_000720795.1	Streptomyces sp. NRRL S-515	strain=NRRL S-515	86.3797	31.7	[29.3 - 34.2%]	0.1333	0.21
GCF_001279495.1	Streptomyces sp. H021	strain=H021	86.3774	31.6	[29.2 - 34.1%]	0.1337	0.2
GCF_000716685.1	Streptomyces virginiae	strain=NRRL B-8091	86.3534	31.6	[29.2 - 34.1%]	0.1337	0.2
GCF_001279845.1	Streptomyces sp. XY533	strain=XY533	86.3523	31.5	[29.1 - 34%]	0.1345	0.19
GCF_000718955.1	Streptomyces sp. NRRL S-575	strain=NRRL S-575	86.352	31.7	[29.3 - 34.2%]	0.1333	0.21
GCF_014170455.1	Streptomyces sp. gCLA4	strain=gCLA4	86.3518	31.1	[28.7 - 33.6%]	0.1362	0.17
GCF_014650935.1	Streptomyces subrutilus	strain=JCM 4834	86.3446	31.5	[29.1 - 34%]	0.1342	0.19
GCF_014217585.1	Streptomyces sp. INR7	strain=INR7	86.3376	31.6	[29.2 - 34.1%]	0.134	0.2
GCF_003148825.1	Streptomyces sp. CG 926	strain=CG 926	86.3352	31.5	[29.1 - 34%]	0.1342	0.19
GCF_001279815.1	Streptomyces sp. XY37	strain=XY37	86.3341	31.5	[29.1 - 34%]	0.1341	0.19
GCF_001279685.1	Streptomyces sp. WM6373	strain=WM6373	86.3338	31.6	[29.2 - 34.1%]	0.1336	0.2
GCF_001279935.1	Streptomyces sp. IGB124	strain=IGB124	86.3305	31.6	[29.2 - 34.1%]	0.1336	0.2
GCF_001279765.1	Streptomyces sp. XY413	strain=XY413	86.3171	31.5	[29.1 - 34%]	0.1342	0.19
GCF_000720455.1	Streptomyces virginiae	strain=NRRL ISP-5094	86.3128	31.5	[29.1 - 34%]	0.1341	0.2
GCF_000718705.1	Streptomyces lavendulae subsp. lavendulae	strain=NRRL WC-3542	86.2927	31.4	[29 - 33.9%]	0.1346	0.19
GCF_000720645.1	Streptomyces sp. NRRL S-378	strain=NRRL S-378	86.2881	31.4	[29 - 33.9%]	0.1348	0.18
GCF_000719625.1	Streptomyces sp. NRRL B-1322	strain=NRRL B-1322	86.2863	31.5	[29.1 - 34%]	0.1344	0.19
GCF_000966965.1	Streptomyces sp. NRRL S-104	strain=NRRL S-104	86.2799	31.6	[29.2 - 34.1%]	0.1337	0.2
GCF_001279925.1	Streptomyces sp. H036	strain=H036	86.2789	31.5	[29.1 - 34%]	0.1343	0.19
GCF_001279885.1	Streptomyces sp. XY593	strain=XY593	86.2763	31.5	[29.1 - 34%]	0.1344	0.19
GCF_000720235.1	Streptomyces sp. NRRL S-98	strain=NRRL S-98	86.2613	31.5	[29.1 - 34%]	0.1343	0.19
GCF_000719855.1	Streptomyces sp. NRRL F-4474	strain=NRRL F-4474	86.2513	31.4	[29 - 33.9%]	0.135	0.18
GCF_004795115.1	Streptomyces sp. A0592	strain=A0592	86.2436	31.4	[29 - 33.9%]	0.1346	0.19
GCF_014648795.1	Streptomyces cinnamonensis	strain=JCM 4019	86.2323	31.5	[29.1 - 34%]	0.1344	0.19
GCF_001953875.1	Streptomyces amritsarensis	strain=MTCC 11845	86.2086	31.4	[29 - 33.9%]	0.1348	0.18
GCF_002007685.1	Streptomyces sp. fd1-xmd	strain=fd1-xmd	86.1773	31.4	[29 - 33.9%]	0.1346	0.19
GCF_001531145.1	Streptomyces sp. IMTB 1903	strain=IMTB 1903	86.1613	31.3	[28.9 - 33.8%]	0.1354	0.18
GCF_001005295.1	Streptomyces yangpuensis	strain=fd2-tb	86.1397	31.1	[28.7 - 33.6%]	0.1363	0.16
GCF_000956015.1	Streptomyces sp. NRRL F-4428	strain=NRRL F-4428	86.0061	31.1	[28.7 - 33.6%]	0.1362	0.17
GCF_000717915.1	Streptomyces sp. NRRL S-244	strain=NRRL S-244	85.9629	30.2	[27.8 - 32.7%]	0.1412	0.11
GCF_001941845.1	Streptomyces sp. TN58	strain=TN58	85.9236	31.1	[28.7 - 33.7%]	0.1361	0.17
GCF_000154885.1	Streptomyces sp. Mg1	strain=Mg1	85.8411	31.1	[28.7 - 33.6%]	0.1361	0.17
GCF_001280885.1	Streptomyces sp. XY332	strain=XY332	85.8279	30.6	[28.2 - 33.1%]	0.1391	0.13
GCF_004364395.1	Streptomyces sp. KS 21	strain=KS 21	85.8163	30.6	[28.2 - 33.1%]	0.1388	0.14
GCF_004794975.1	Streptomyces sp. A1547	strain=A1547	85.7336	30.5	[28.1 - 33%]	0.1394	0.13
GCF_003550235.1	Streptomyces sp. 3211.1	strain=3211.1	85.7142	30.1	[27.7 - 32.6%]	0.1418	0.11
GCF_000612545.1	Streptomyces sp. PCS3-D2	strain=PCS3-D2	85.6927	30.3	[27.9 - 32.8%]	0.1405	0.12
GCF_000719345.1	Streptomyces sp. NRRL F-2664	strain=NRRL F-2664	85.6884	30.6	[28.2 - 33.1%]	0.1389	0.13
GCF_000717655.1	Streptomyces katrae	strain=NRRL B-16271	85.6649	30.5	[28.1 - 33%]	0.1396	0.13
GCF_001279655.1	Streptomyces sp. WM6372	strain=WM6372	85.6475	30.1	[27.7 - 32.6%]	0.1419	0.11
GCF_014650555.1	Streptomyces goshikiensis	strain=JCM 4640	85.6198	29.9	[27.5 - 32.4%]	0.1425	0.1
GCF_004365455.1	Streptomyces sp. 25	strain=25	85.5694	30.1	[27.7 - 32.6%]	0.1418	0.11
GCF_001905025.1	Streptomyces sp. CB03578	strain=CB03578	85.5397	30	[27.6 - 32.5%]	0.142	0.11
GCF_003846165.1	Streptomyces sp. ADI91-18	strain=ADI91-18	85.5343	29.9	[27.5 - 32.4%]	0.1427	0.1
GCF_002803195.1	Streptomyces sp. CB02120-2	strain=CB02120-2	85.5337	29.9	[27.6 - 32.5%]	0.1424	0.1
GCF_003721495.1	Streptomyces sp. ADI95-16	strain=ADI95-16	85.5294	30.2	[27.8 - 32.7%]	0.1412	0.11
GCF_000720145.1	Streptomyces sp. NRRL F-2747	strain=NRRL F-2747	85.5131	29.9	[27.5 - 32.4%]	0.1426	0.1
GCF_003287915.1	Streptomyces sp. ICC4	strain=ICC4	85.507	30	[27.7 - 32.5%]	0.1419	0.11
GCF_008704935.1	Streptomyces vinaceus	strain=ATCC 27476	85.4929	29.8	[27.4 - 32.3%]	0.1433	0.1
GCF_000412265.2	Streptomyces sp. Mg1	strain=Mg1	85.4909	30.1	[27.7 - 32.6%]	0.1414	0.11
GCF_001905425.1	Streptomyces sp. MJM1172	strain=MJM1172	85.489	30	[27.6 - 32.5%]	0.1421	0.11
GCF_000718155.1	Streptomyces lavendulae subsp. lavendulae	strain=NRRL B-2774	85.4123	29.6	[27.3 - 32.1%]	0.1441	0.09
GCF_003287935.1	Streptomyces sp. ICC1	strain=ICC1	85.4111	30	[27.6 - 32.5%]	0.142	0.11
GCF_000158895.1	Streptomyces sp. C	strain=C	85.4078	29.8	[27.4 - 32.3%]	0.1435	0.09
GCF_003751425.1	Streptomyces sp. 2132.2	strain=2132.2	85.394	29.7	[27.3 - 32.2%]	0.1438	0.09
GCF_002803845.1	Streptomyces lavendulae subsp. lavendulae	strain=CCM 3239	85.388	29.7	[27.3 - 32.2%]	0.1439	0.09
GCF_002754535.1	Streptomyces sp. 61	strain=61	85.373	29.7	[27.3 - 32.2%]	0.1437	0.09
GCF_004341655.1	Streptomyces sp. BK038	strain=BK038	85.3487	29.6	[27.2 - 32.1%]	0.1443	0.09
GCF_003949535.1	Streptomyces sp. WAC07061	strain=WAC07061	85.2724	29.8	[27.4 - 32.3%]	0.1433	0.1
GCF_014656155.1	Streptomyces vinaceus	strain=JCM 4849	85.2566	29.5	[27.2 - 32%]	0.1447	0.09
GCF_001044425.1	Streptomyces roseus	strain=ATCC 31245	85.2035	29.7	[27.3 - 32.2%]	0.144	0.09
GCF_003950035.1	Streptomyces sp. W1SF4	strain=W1SF4	85.0391	29.2	[26.8 - 31.7%]	0.1467	0.07
GCF_003949875.1	Streptomyces sp. WAC07149	strain=WAC07149	85.0226	29.2	[26.8 - 31.7%]	0.1468	0.07
GCF_001279725.1	Streptomyces sp. WM4235	strain=WM4235	85.0183	29.2	[26.8 - 31.7%]	0.1467	0.07
GCF_014650775.1	Streptomyces cirratus	strain=JCM 4738	84.9039	29	[26.6 - 31.5%]	0.148	0.07
GCF_003814735.1	Streptomyces sp. Ag109_G2-6	strain=Ag109_G2-6	84.8103	28.8	[26.5 - 31.3%]	0.1487	0.06
GCF_003634815.1	Streptomyces sp. 3211.6	strain=3211.6	84.7771	28.8	[26.5 - 31.3%]	0.1488	0.06
GCF_002028425.1	Streptomyces katrae	strain=S3	84.7653	28.8	[26.5 - 31.3%]	0.1487	0.06
GCF_000966975.1	Streptomyces katrae	strain=NRRL ISP-5550	84.7556	29.4	[27.1 - 31.9%]	0.1453	0.08
GCF_002813225.1	Streptomyces sp. Ag109_G2-1	strain=Ag109_G2-1	84.7298	28.8	[26.4 - 31.3%]	0.149	0.06
GCF_004795055.1	Streptomyces sp. A1136	strain=A1136	84.4099	28.5	[26.1 - 31%]	0.1508	0.05
GCF_013401435.1	Streptomyces sp. BR123	strain=BR123	84.1138	28.5	[26.2 - 31%]	0.1505	0.06
GCF_003949955.1	Streptomyces sp. WAC05292	strain=WAC05292	83.5249	27.3	[25 - 29.8%]	0.158	0.03
GCF_008642295.1	Streptomyces venezuelae	strain=ATCC 21782	83.51	26.6	[24.2 - 29.1%]	0.1628	0.02
GCF_003325375.1	Streptomyces globosus	strain=LZH-48	83.446	26.8	[24.4 - 29.3%]	0.1616	0.02
GCF_014649915.1	Streptomyces toxytricini	strain=JCM 4421	83.3749	26.7	[24.4 - 29.2%]	0.1618	0.02
GCF_014748315.1	Streptomyces sp. KD18	strain=KD18	83.2996	26.8	[24.4 - 29.3%]	0.1616	0.02
GCF_003949795.1	Streptomyces sp. WAC06614	strain=WAC06614	83.2406	26.5	[24.2 - 29%]	0.1634	0.02
GCF_000719335.1	Streptomyces sp. NRRL S-87	strain=NRRL S-87	81.8393	25.4	[23 - 27.9%]	0.1714	0.01
GCF_001426585.1	Streptomyces sp. Root431	strain=Root431	79.818	23	[20.7 - 25.4%]	0.1904	0
GCF_000384175.1	Streptomyces purpureus KA281	strain=KA281	79.7749	23.4	[21.1 - 25.8%]	0.1871	0
GCF_003949805.1	Streptomyces sp. WAC08241	strain=WAC08241	79.7284	23.5	[21.2 - 26%]	0.1859	0
GCF_014649095.1	Streptomyces cinereoruber subsp. cinereoruber	strain=JCM 4205	79.678	23.3	[21 - 25.7%]	0.1881	0
GCF_008639165.1	Streptomyces venezuelae ATCC 10712	strain=ATCC 10712	79.6646	23.2	[20.9 - 25.7%]	0.1886	0
GCF_000498935.1	Streptomyces sp. HCCB10043	strain=HCCB10043	79.6496	24	[21.7 - 26.5%]	0.1817	0.01
GCF_008042125.1	Streptomyces sp. ms191	strain=ms191	79.6419	23.3	[21 - 25.8%]	0.1875	0
GCF_014197485.1	Streptomyces cinereoruber	strain=NRRL ISP-5012	79.6245	23.3	[21 - 25.8%]	0.1878	0
GCF_003116715.1	Streptomyces sp. CS081A	strain=CS081A	79.6214	23.3	[21 - 25.8%]	0.1874	0
GCF_011758705.1	Streptomyces cinereoruber	strain=DSM 41512	79.6184	23.5	[21.2 - 25.9%]	0.1863	0
GCF_014648195.1	Streptomyces purpureus	strain=JCM 3172	79.6166	23.2	[20.9 - 25.7%]	0.1883	0
GCF_008705255.1	Streptomyces venezuelae	strain=ATCC 10595	79.6162	23.2	[20.9 - 25.7%]	0.1886	0
GCF_000253235.1	Streptomyces venezuelae ATCC 10712	strain=ATCC 10712	79.6116	23.2	[20.9 - 25.6%]	0.1889	0
GCF_009862215.1	Streptomyces sp. SID7814	strain=SID7814	79.6116	23.2	[20.9 - 25.6%]	0.1889	0
GCF_005981935.1	Streptomyces chryseus	strain=DSM 40420	79.6094	23.3	[21 - 25.8%]	0.1878	0
GCF_001426405.1	Streptomyces sp. Root1304	strain=Root1304	79.6009	23.1	[20.8 - 25.5%]	0.1897	0
GCF_002943895.1	Streptomyces sp. WAC00288	strain=WAC00288	79.5987	23.4	[21.2 - 25.9%]	0.1865	0
GCF_005517195.1	Streptomyces exfoliatus	strain=A1013Y	79.5979	23.2	[20.9 - 25.7%]	0.1886	0
GCF_009789635.1	Streptomyces sp. QHH-9511	strain=QHH-9511	79.583	23.1	[20.9 - 25.6%]	0.1891	0
GCF_009299385.1	Streptomyces cinereoruber	strain=ATCC 19740	79.5781	23.5	[21.2 - 25.9%]	0.1863	0
GCF_001653515.1	Streptomyces sp. ERV7	strain=ERV7	79.5765	23.5	[21.2 - 26%]	0.1859	0
GCF_001592685.1	Streptomyces sp. WAC04657	strain=WAC04657	79.5648	23.5	[21.2 - 25.9%]	0.1862	0
GCF_008042145.1	Streptomyces sp. adm13(2018)	strain=adm13(2018)	79.5624	23.6	[21.3 - 26%]	0.1855	0
GCF_014649735.1	Streptomyces lavendofoliae	strain=JCM 4391	79.561	23.1	[20.8 - 25.5%]	0.1898	0
GCF_003687505.1	Streptomyces sp. S1	strain=S1	79.5556	23.5	[21.2 - 25.9%]	0.1862	0
GCF_001418135.1	Streptomyces aureus	strain=NRRL B-2808	79.546	23.5	[21.2 - 25.9%]	0.1863	0
GCF_004117935.1	Streptomyces roseicoloratus	strain=TRM44457	79.5373	23.6	[21.3 - 26.1%]	0.1851	0
GCF_001008345.1	Streptomyces showdoensis	strain=ATCC 15227	79.5297	23.2	[20.9 - 25.6%]	0.1889	0
GCF_003182455.1	Streptomyces venezuelae	strain=O-10.2	79.5213	23	[20.8 - 25.5%]	0.1899	0
GCF_008639045.1	Streptomyces venezuelae	strain=ATCC 21113	79.5196	23.2	[20.9 - 25.7%]	0.1883	0
GCF_003173635.1	Streptomyces sp. ZEA17I	strain=ZEA17I	79.5152	24.1	[21.8 - 26.6%]	0.1812	0.01
GCF_009872515.1	Streptomyces sp. SID5770	strain=SID5770	79.5104	23.6	[21.3 - 26%]	0.1853	0
GCF_900105415.1	Streptomyces sp. TLI_105	strain=TLI_105	79.5019	23.2	[20.9 - 25.7%]	0.1887	0
GCF_000716625.1	Streptomyces bikiniensis	strain=NRRL ISP-5580	79.4987	23.3	[21 - 25.8%]	0.1876	0
GCF_001886595.1	Streptomyces venezuelae	strain=NRRL B-65442	79.4971	23.2	[20.9 - 25.7%]	0.1886	0
GCF_005981925.1	Streptomyces albidochromogenes	strain=DSM 41800	79.4918	23.1	[20.8 - 25.6%]	0.1892	0
GCF_005981965.1	Streptomyces chryseus	strain=DSM 40431	79.4899	23	[20.7 - 25.5%]	0.19	0
GCF_001427745.1	Streptomyces sp. Root66D1	strain=Root66D1	79.4886	23.1	[20.8 - 25.5%]	0.1898	0
GCF_004346385.1	Streptomyces sp. BK215	strain=BK215	79.4876	23	[20.7 - 25.5%]	0.1902	0
GCF_001905885.1	Streptomyces sp. CB03234	strain=CB03234	79.4866	23.1	[20.9 - 25.6%]	0.1891	0
GCF_008642375.1	Streptomyces venezuelae	strain=ATCC 15068	79.4635	23.2	[20.9 - 25.6%]	0.1888	0
GCF_014650755.1	Streptomyces chryseus	strain=JCM 4737	79.4629	22.8	[20.5 - 25.2%]	0.1925	0
GCF_000718595.1	Streptomyces bikiniensis	strain=NRRL ISP-5582	79.4627	23.3	[21 - 25.7%]	0.1879	0
GCF_014650095.1	Streptomyces nashvillensis	strain=JCM 4498	79.4627	22.9	[20.6 - 25.4%]	0.1912	0
GCF_012396115.1	Streptomyces somaliensis DSM 40738	strain=DSM 40738	79.4597	23.3	[21 - 25.8%]	0.1876	0
GCF_002156145.1	Streptomyces sp. NRRL B-24572	strain=NRRL B-24572	79.4591	23.5	[21.2 - 26%]	0.1857	0
GCF_001280095.1	Streptomyces sp. NRRL F-6491	strain=NRRL F-6491	79.4564	23.2	[20.9 - 25.6%]	0.1887	0
GCF_000518045.1	Streptomyces exfoliatus DSM 41693	strain=DSM 41693	79.4558	23.1	[20.9 - 25.6%]	0.1891	0
GCF_000725545.1	Streptomyces exfoliatus	strain=NRRL B-2924	79.4515	23.1	[20.8 - 25.6%]	0.1895	0
GCF_001905665.1	Streptomyces sp. CB02261	strain=CB02261	79.4405	23.1	[20.8 - 25.5%]	0.1899	0
GCF_013358305.1	Streptomyces lunaelactis	strain=MM37	79.4398	23.1	[20.8 - 25.5%]	0.1898	0
GCF_000302615.1	Streptomyces sp. SS	strain=SS	79.437	22.8	[20.5 - 25.3%]	0.192	0
GCF_014649715.1	Streptomyces lateritius	strain=JCM 4389	79.4345	23	[20.7 - 25.5%]	0.1902	0
GCF_003752205.1	Streptomyces sp. PanSC19	strain=PanSC19	79.4297	23.2	[20.9 - 25.7%]	0.1883	0
GCF_013357935.1	Streptomyces lunaelactis	strain=MM126	79.4264	23	[20.7 - 25.5%]	0.1903	0
GCF_004353505.1	Streptomyces sp. WAC05374	strain=WAC05374 delta StrH	79.4224	23.1	[20.8 - 25.5%]	0.1897	0
GCF_006539185.1	Streptomyces gardneri	strain=NBRC 12865	79.4214	23.1	[20.8 - 25.5%]	0.1896	0
GCF_003984785.1	Streptomyces sp. WAC05374	strain=WAC05374	79.4203	23.3	[21 - 25.7%]	0.1881	0
GCF_013358155.1	Streptomyces lunaelactis	strain=MM25	79.4109	23.1	[20.8 - 25.5%]	0.1898	0
GCF_001280125.1	Streptomyces sp. NRRL F-6492	strain=NRRL F-6492	79.4102	23.2	[20.9 - 25.7%]	0.1886	0
GCF_001746485.1	Streptomyces agglomeratus	strain=5-1-8	79.4089	22.9	[20.6 - 25.3%]	0.1913	0
GCF_014655085.1	Streptomyces gardneri	strain=JCM 4375	79.4061	23.1	[20.8 - 25.5%]	0.1896	0
GCF_001646665.1	Streptomyces albulus	strain=B-3066	79.3968	23.1	[20.8 - 25.5%]	0.1897	0
GCF_014648895.1	Streptomyces tanashiensis	strain=JCM 4086	79.3926	22.9	[20.6 - 25.4%]	0.1912	0
GCF_003386135.1	Streptomyces sp. 62	strain=62	79.3869	23.2	[20.9 - 25.7%]	0.1885	0
GCF_000719555.1	Streptomyces sp. NRRL F-5727	strain=NRRL F-5727	79.377	22.9	[20.6 - 25.4%]	0.191	0
GCF_003949845.1	Streptomyces sp. WAC01280	strain=WAC01280	79.3735	22.9	[20.7 - 25.4%]	0.1907	0
GCF_002099185.1	Streptomyces sp. CB03238	strain=CB03238	79.3686	23.2	[20.9 - 25.6%]	0.189	0
GCF_014650855.1	Streptomyces chryseus	strain=JCM 4768	79.3673	22.7	[20.4 - 25.1%]	0.1931	0
GCF_010550525.1	Streptomyces anulatus	strain=SID9598	79.3562	23.5	[21.2 - 26%]	0.1857	0
GCF_000830005.1	Streptomyces vietnamensis	strain=GIMV4.0001	79.3475	23.3	[21 - 25.7%]	0.188	0
GCF_001746415.1	Streptomyces agglomeratus	strain=6-3-2	79.3436	23	[20.7 - 25.5%]	0.1903	0
GCF_009739905.1	Streptomyces ficellus	strain=NRRL 8067	79.3403	23	[20.7 - 25.5%]	0.1903	0
GCF_001746455.1	Streptomyces agglomeratus	strain=9-3-15	79.3363	23	[20.7 - 25.4%]	0.1905	0
GCF_012927245.1	Streptomyces sp. R302	strain=R302	79.3308	22.8	[20.6 - 25.3%]	0.1917	0
GCF_004353545.1	Streptomyces sp. WAC05374	strain=WAC05374 delta StrF	79.3251	23.1	[20.8 - 25.5%]	0.1897	0
GCF_014649755.1	Streptomyces litmocidini	strain=JCM 4394	79.3242	22.9	[20.6 - 25.3%]	0.1913	0
GCF_014656215.1	Streptomyces zaomyceticus	strain=JCM 4864	79.3207	23.1	[20.8 - 25.6%]	0.1895	0
GCF_008634015.1	Streptomyces filamentosus	strain=ATCC 23958	79.3197	23.1	[20.8 - 25.6%]	0.1894	0
GCF_010548665.1	Streptomyces parvus	strain=SID7590	79.3172	23.7	[21.4 - 26.2%]	0.1842	0
GCF_010548185.1	Streptomyces sp. SID10692	strain=SID10692	79.3112	23.9	[21.6 - 26.4%]	0.1825	0
GCF_000718175.1	Streptomyces exfoliatus	strain=NRRL B-2924	79.3089	23.1	[20.9 - 25.6%]	0.1891	0
GCF_014649015.1	Streptomyces narbonensis	strain=JCM 4147	79.308	23	[20.7 - 25.5%]	0.1903	0
GCF_013358105.1	Streptomyces lunaelactis	strain=MM40	79.3016	23	[20.8 - 25.5%]	0.1899	0
GCF_003949895.1	Streptomyces sp. WAC04770	strain=WAC04770	79.3011	23.6	[21.3 - 26.1%]	0.1848	0
GCF_004359235.1	Streptomyces sp. WAC05374	strain=WAC05374 delta StrI	79.2992	23.1	[20.8 - 25.5%]	0.1896	0
GCF_013358025.1	Streptomyces lunaelactis	strain=MM113	79.2955	23.1	[20.8 - 25.6%]	0.1894	0
GCF_012927225.1	Streptomyces sp. R301	strain=R301	79.288	22.8	[20.5 - 25.3%]	0.1919	0
GCF_013358065.1	Streptomyces lunaelactis	strain=MM31	79.2835	23.1	[20.8 - 25.5%]	0.1897	0
GCF_013358245.1	Streptomyces lunaelactis	strain=MM83	79.2796	23.1	[20.8 - 25.5%]	0.1895	0
GCF_000716335.1	Streptomyces sp. NRRL S-118	strain=NRRL S-118	79.2723	23	[20.8 - 25.5%]	0.1899	0
GCF_002846415.1	Streptomyces sp. TLI_146	strain=TLI_146	79.2678	23.2	[20.9 - 25.6%]	0.1888	0
GCF_001905825.1	Streptomyces sp. CB02009	strain=CB02009	79.267	23.3	[21 - 25.7%]	0.1881	0
GCF_013358055.1	Streptomyces lunaelactis	strain=MM91	79.2592	23.1	[20.8 - 25.6%]	0.1894	0
GCF_014650175.1	Streptomyces termitum	strain=JCM 4518	79.259	22.9	[20.6 - 25.3%]	0.1914	0
GCF_013358335.1	Streptomyces lunaelactis	strain=MM22	79.2551	23	[20.8 - 25.5%]	0.1899	0
GCF_013357965.1	Streptomyces lunaelactis	strain=MM115	79.2521	23.1	[20.8 - 25.6%]	0.1892	0
GCF_001049855.1	Streptomyces sp. Wb2n-11	strain=Wb2n-11	79.2469	23	[20.7 - 25.4%]	0.1904	0
GCF_014203895.1	Streptomyces sp. SFB5A	strain=SFB5A	79.2416	23.1	[20.8 - 25.5%]	0.1897	0
GCF_014451325.1	Streptomyces sp. CB02980	strain=CB02980	79.2413	23.2	[20.9 - 25.7%]	0.1883	0
GCF_013358325.1	Streptomyces lunaelactis	strain=MM51	79.2371	23.1	[20.8 - 25.5%]	0.1895	0
GCF_004794175.1	Streptomyces sp. 1AS2c	strain=1AS2c	79.2351	23.5	[21.2 - 26%]	0.1857	0
GCF_001270515.1	Streptomyces viridochromogenes	strain=NRRL 3427	79.2339	22.9	[20.6 - 25.3%]	0.1915	0
GCF_014654895.1	Streptomyces filamentosus	strain=JCM 4122	79.2333	23.1	[20.8 - 25.5%]	0.1897	0
GCF_001746475.1	Streptomyces agglomeratus	strain=5-2-6	79.2253	23	[20.7 - 25.4%]	0.1906	0
GCF_000717595.1	Streptomyces flavochromogenes	strain=NRRL B-2684	79.2229	23	[20.8 - 25.5%]	0.1899	0
GCF_000720875.1	Streptomyces globisporus subsp. globisporus	strain=NRRL B-2293	79.2224	23	[20.7 - 25.5%]	0.19	0
GCF_009865505.1	Streptomyces sp. SID2119	strain=SID2119	79.2193	23.6	[21.3 - 26.1%]	0.185	0
GCF_013358135.1	Streptomyces lunaelactis	strain=MM28	79.2159	23.1	[20.8 - 25.5%]	0.1898	0
GCF_014649795.1	Streptomyces melanogenes	strain=JCM 4398	79.2156	23.1	[20.8 - 25.5%]	0.1896	0
GCF_002982015.1	Streptomyces sp. ST5x	strain=ST5x	79.2138	23.5	[21.2 - 25.9%]	0.1863	0
GCF_002094995.1	Streptomyces sp. S8	strain=S8	79.2115	23.3	[21 - 25.8%]	0.1877	0
GCF_008704425.1	Streptomyces fradiae ATCC 10745 = DSM 40063	strain=ATCC 10745	79.1973	23.9	[21.6 - 26.3%]	0.1831	0
GCF_003352445.1	Streptomyces cavourensis	strain=TJ430	79.196	23.1	[20.9 - 25.6%]	0.1891	0
GCF_013357925.1	Streptomyces lunaelactis	strain=MMun143	79.1956	22.9	[20.7 - 25.4%]	0.1908	0
GCF_013358045.1	Streptomyces lunaelactis	strain=MM103	79.1947	23	[20.8 - 25.5%]	0.1899	0
GCF_013363735.1	Streptomyces sp. CAI-155	strain=CAI-155	79.1896	23	[20.7 - 25.4%]	0.1906	0
GCF_013358165.1	Streptomyces lunaelactis	strain=MM15	79.1873	23.1	[20.8 - 25.5%]	0.1896	0
GCF_002551425.1	Streptomyces sp. b94	strain=b94	79.1833	23.6	[21.3 - 26.1%]	0.1852	0
GCF_010548615.1	Streptomyces anulatus	strain=SID505	79.1818	23.5	[21.2 - 25.9%]	0.1863	0
GCF_010548475.1	Streptomyces fulvissimus	strain=SID14438	79.1715	23	[20.7 - 25.4%]	0.1906	0
GCF_010550375.1	Streptomyces sp. SID8016	strain=SID8016	79.1706	23.5	[21.2 - 26%]	0.1857	0
GCF_013358115.1	Streptomyces lunaelactis	strain=MM29	79.1693	23.1	[20.8 - 25.5%]	0.1898	0
GCF_000718525.1	Streptomyces griseus subsp. griseus	strain=NRRL B-2621	79.1677	23	[20.7 - 25.5%]	0.1902	0
GCF_000258595.1	Streptomyces somaliensis DSM 40738	strain=DSM 40738	79.1672	23.1	[20.8 - 25.5%]	0.1897	0
GCF_000721035.1	Streptomyces griseus subsp. griseus	strain=NRRL B-2621	79.1648	23	[20.7 - 25.5%]	0.1902	0
GCF_009862565.1	Streptomyces sp. SID4944	strain=SID4944	79.1617	23.3	[21 - 25.7%]	0.1879	0
GCF_000226995.1	Streptomyces sp. Wigar10	strain=Wigar10	79.1579	23.3	[21 - 25.7%]	0.1879	0
GCF_010550535.1	Streptomyces sp. SID9124	strain=SID9124	79.1573	23.3	[21 - 25.8%]	0.1878	0
GCF_013358235.1	Streptomyces lunaelactis	strain=MM78	79.1514	23.1	[20.8 - 25.5%]	0.1897	0
GCF_014748265.1	Streptomyces sp. JV180	strain=JV180	79.1513	23.4	[21.1 - 25.8%]	0.1871	0
GCF_000715745.1	Streptomyces californicus	strain=NRRL B-3320	79.1487	23.8	[21.5 - 26.2%]	0.1838	0
GCF_008120935.1	Streptomyces sp. sk2.1	strain=sk2.1	79.1386	23.4	[21.1 - 25.9%]	0.1869	0
GCF_014650895.1	Streptomyces omiyaensis	strain=JCM 4806	79.1376	22.9	[20.6 - 25.4%]	0.1912	0
GCF_002158965.1	Streptomyces lavendulae subsp. lavendulae	strain=ATCC 13664	79.1358	23.1	[20.9 - 25.6%]	0.189	0
GCF_001746465.1	Streptomyces agglomeratus	strain=5-1-3	79.1306	23	[20.7 - 25.4%]	0.1907	0
GCF_002154445.1	Streptomyces fradiae	strain=NRRL B-1195	79.1297	24.3	[22 - 26.8%]	0.1797	0.01
GCF_014649855.1	Streptomyces roseolus	strain=JCM 4411	79.1286	22.8	[20.5 - 25.3%]	0.192	0
GCF_000716445.1	Streptomyces wedmorensis	strain=NRRL 3426	79.1278	22.8	[20.5 - 25.3%]	0.1919	0
GCF_010548705.1	Streptomyces anulatus	strain=SID7903	79.1253	23.2	[20.9 - 25.6%]	0.1887	0
GCF_000429085.1	Streptomyces flavidovirens DSM 40150	strain=DSM 40150	79.1247	22.7	[20.4 - 25.1%]	0.1934	0
GCF_006788935.1	Streptomyces cavourensis	strain=DSM 41795	79.1244	23.1	[20.9 - 25.6%]	0.1891	0
GCF_014596505.1	Streptomyces sp. CBMA370	strain=CBMA370	79.1237	23.5	[21.2 - 26%]	0.1859	0
GCF_014649215.1	Streptomyces cavourensis	strain=JCM 4298	79.1184	23	[20.7 - 25.5%]	0.1901	0
GCF_000373305.1	Streptomyces sp. CcalMP-8W	strain=CcalMP-8W	79.1165	23	[20.7 - 25.5%]	0.1903	0
GCF_009862145.1	Streptomyces sp. SID8356	strain=SID8356	79.1165	23	[20.7 - 25.5%]	0.1903	0
GCF_002551335.1	Streptomyces sp. ms184	strain=ms184	79.1063	23.2	[20.9 - 25.7%]	0.1883	0
GCF_000377145.1	Streptomyces sp. CNT372	strain=CNT372	79.1062	22.8	[20.5 - 25.3%]	0.1921	0
GCF_009865605.1	Streptomyces sp. SID1034	strain=SID1034	79.1052	23.2	[20.9 - 25.7%]	0.1885	0
GCF_000156455.1	Streptomyces filamentosus NRRL 15998	strain=NRRL 15998	79.1031	23.1	[20.8 - 25.6%]	0.1892	0
GCF_009862965.1	Streptomyces sp. SID5466	strain=SID5466	79.1031	23.1	[20.8 - 25.6%]	0.1892	0
GCF_003248335.1	Streptomyces sp. AC1-42T	strain=AC1-42T	79.1015	22.8	[20.5 - 25.3%]	0.1919	0
GCF_010548565.1	Streptomyces griseus	strain=SID164	79.0942	23.4	[21.1 - 25.9%]	0.1865	0
GCF_002803175.1	Streptomyces sp. CB02613	strain=CB02613	79.0915	22.9	[20.6 - 25.3%]	0.1914	0
GCF_009862115.1	Streptomyces sp. SID8359	strain=SID8359	79.0886	23.2	[20.9 - 25.7%]	0.1883	0
GCF_000647875.1	Streptomyces sp. SolWspMP-sol2th	strain=SolWspMP-sol2th	79.0863	23.2	[20.9 - 25.7%]	0.1883	0
GCF_003846185.1	Streptomyces sp. ADI96-02	strain=ADI96-02	79.0862	23.1	[20.8 - 25.5%]	0.1898	0
GCF_003610995.1	Streptomyces griseus subsp. griseus	strain=ATCC 13273	79.0841	22.9	[20.7 - 25.4%]	0.1908	0
GCF_003054555.1	Streptomyces lunaelactis	strain=MM109	79.0837	23	[20.8 - 25.5%]	0.1899	0
GCF_002188345.1	Streptomyces sp. CS057	strain=CS057	79.0829	23.1	[20.8 - 25.6%]	0.1891	0
GCF_002848525.1	Streptomyces sp. DUT11	strain=DUT11	79.0765	23.1	[20.8 - 25.6%]	0.1894	0
GCF_000721205.1	Streptomyces griseus subsp. rhodochrous	strain=NRRL B-2930	79.0758	23.4	[21.1 - 25.8%]	0.1871	0
GCF_000718205.1	Streptomyces griseus subsp. rhodochrous	strain=NRRL B-2931	79.0744	23.4	[21.1 - 25.8%]	0.1873	0
GCF_004795035.1	Streptomyces sp. A0958	strain=A0958	79.0678	22.9	[20.6 - 25.3%]	0.1913	0
GCF_001750785.1	Streptomyces rubrolavendulae	strain=MJM4426	79.0666	23.9	[21.6 - 26.3%]	0.1829	0
GCF_002804165.1	Streptomyces cavourensis	strain=1AS2a	79.0665	23.1	[20.8 - 25.5%]	0.1895	0
GCF_000717015.1	Streptomyces brasiliensis	strain=NRRL B-1626	79.0649	23.3	[21 - 25.8%]	0.1877	0
GCF_013387495.1	Streptomyces sp. PKU-EA00015	strain=PKU-EA00015	79.0613	23	[20.7 - 25.4%]	0.1905	0
GCF_014649335.1	Streptomyces roseolilacinus	strain=JCM 4335	79.0612	23	[20.7 - 25.4%]	0.1905	0
GCF_001278095.1	Streptomyces sp. CFMR 7	strain=CFMR-7	79.0587	23.1	[20.8 - 25.6%]	0.1893	0
GCF_003116725.1	Streptomyces sp. CS065A	strain=CS065A	79.0587	22.9	[20.6 - 25.3%]	0.1913	0
GCF_004000405.1	Streptomyces sp. B27	strain=B27	79.058	23	[20.7 - 25.4%]	0.1905	0
GCF_000719585.1	Streptomyces sp. NRRL F-5681	strain=NRRL F-5681	79.0571	23.3	[21 - 25.7%]	0.1879	0
GCF_013362995.1	Streptomyces sp. TRM64462	strain=TRM64462	79.0566	23.2	[20.9 - 25.7%]	0.1886	0
GCF_014495705.1	Streptomyces sp. CB00271	strain=CB00271	79.0565	23.2	[20.9 - 25.6%]	0.1889	0
GCF_009865135.1	Streptomyces sp. SID8374	strain=SID8374	79.0557	22.9	[20.6 - 25.4%]	0.1912	0
GCF_000721415.1	Streptomyces sp. NRRL F-5702	strain=NRRL F-5702	79.0553	23.4	[21.1 - 25.8%]	0.1872	0
GCF_003097515.1	Streptomyces tirandamycinicus	strain=HNM0039	79.0514	23.5	[21.2 - 25.9%]	0.1863	0
GCF_014650355.1	Streptomyces michiganensis	strain=JCM 4594	79.0472	22.8	[20.5 - 25.3%]	0.1918	0
GCF_010548045.1	Streptomyces anulatus	strain=SID10689	79.047	23.3	[21 - 25.7%]	0.188	0
GCF_000261345.2	Streptomyces globisporus C-1027	strain=C-1027	79.0444	23.1	[20.8 - 25.5%]	0.1896	0
GCF_000721575.1	Streptomyces griseus subsp. griseus	strain=NRRL F-2227	79.0438	23.3	[21 - 25.7%]	0.1879	0
GCF_014656075.1	Streptomyces hydrogenans	strain=JCM 4771	79.0438	22.9	[20.6 - 25.3%]	0.1915	0
GCF_900091865.1	Streptomyces sp. DvalAA-19	strain=DvalAA-19	79.0417	23.1	[20.9 - 25.6%]	0.189	0
GCF_000717965.1	Streptomyces purpeochromogenes	strain=NRRL B-3012	79.0403	23.3	[21 - 25.8%]	0.1876	0
GCF_002082175.1	Streptomyces violaceoruber	strain=S21	79.0391	23.4	[21.1 - 25.8%]	0.1873	0
GCF_004403015.1	Streptomyces sp. ICN441	strain=ICN441	79.0389	23.4	[21.1 - 25.9%]	0.1866	0
GCF_001905485.1	Streptomyces sp. TSRI0261	strain=TSRI0261	79.0385	23.1	[20.8 - 25.6%]	0.1895	0
GCF_000154945.1	Streptomyces pristinaespiralis ATCC 25486	strain=ATCC 25486	79.035	23	[20.7 - 25.5%]	0.1902	0
GCF_000478605.2	Streptomyces thermolilacinus SPC6	strain=SPC6	79.0327	23.2	[20.9 - 25.7%]	0.1883	0
GCF_002119225.1	Streptomyces fradiae ATCC 10745 = DSM 40063	strain=DSM 40063	79.0323	23.8	[21.5 - 26.2%]	0.1839	0
GCF_001905595.1	Streptomyces sp. CB00316	strain=CB00316	79.0316	22.9	[20.6 - 25.4%]	0.191	0
GCF_007679945.1	Streptomyces sp. CFMR 7	strain=DE0061	79.0297	23	[20.7 - 25.5%]	0.1902	0
GCF_002217715.1	Streptomyces sp. SS07	strain=SS07	79.026	23.1	[20.8 - 25.5%]	0.1897	0
GCF_013363475.1	Streptomyces sp. KAI-26	strain=KAI-26	79.0246	23	[20.7 - 25.4%]	0.1904	0
GCF_002551245.1	Streptomyces sp. rh34	strain=rh34	79.0235	23.2	[20.9 - 25.7%]	0.1885	0
GCF_000718245.1	Streptomyces californicus	strain=NRRL B-2988	79.0234	23.3	[21 - 25.8%]	0.1876	0
GCF_003324565.1	Streptomyces sp. SDr-06	strain=SDr-06	79.023	22.9	[20.6 - 25.3%]	0.1916	0
GCF_009823745.1	Streptomyces sp. YIM 132580	strain=YIM 132580	79.022	22.6	[20.4 - 25.1%]	0.1935	0
GCF_000725715.1	Streptomyces sp. NRRL WC-3719	strain=NRRL WC-3719	79.0215	23.8	[21.5 - 26.3%]	0.1832	0
GCF_002705725.1	Streptomyces sp. AmelKG-D3	strain=AmelKG-D3	79.0211	23.1	[20.8 - 25.6%]	0.1895	0
GCF_009862205.1	Streptomyces sp. SID8350	strain=SID8350	79.0211	23.1	[20.8 - 25.6%]	0.1895	0
GCF_013401535.1	Streptomyces sp. CB04723	strain=CB04723	79.0206	23.5	[21.2 - 25.9%]	0.1863	0
GCF_001270675.1	Streptomyces griseus subsp. rhodochrous	strain=NRRL B-2929	79.0191	23.4	[21.1 - 25.8%]	0.1873	0
GCF_008271805.1	Streptomyces sp. TRM49041	strain=TRM49041	79.0183	23	[20.7 - 25.5%]	0.1903	0
GCF_003122365.1	Streptomyces spongiicola	strain=HNM0071	79.017	23.3	[21 - 25.8%]	0.1877	0
GCF_001931635.1	Streptomyces sp. Tue 6075	strain=Tue6075	79.0159	23.1	[20.8 - 25.5%]	0.1898	0
GCF_014596525.1	Streptomyces sp. CBMA291	strain=CBMA291	79.0153	23.4	[21.1 - 25.9%]	0.1868	0
GCF_001905525.1	Streptomyces sp. TSRI0395	strain=TSRI0395	79.0148	22.9	[20.6 - 25.4%]	0.1909	0
GCF_900091795.1	Streptomyces sp. Termitarium-T10T-6	strain=Termitarium-T10T-6	79.014	23.2	[20.9 - 25.6%]	0.1887	0
GCF_010548715.1	Streptomyces sp. SID7909	strain=SID7909	79.0138	23	[20.7 - 25.4%]	0.1907	0
GCF_003353555.1	Streptomyces sp. HB202	strain=HB202	79.0132	23	[20.7 - 25.5%]	0.19	0
GCF_009863145.1	Streptomyces sp. SID4937	strain=SID4937	79.013	22.9	[20.6 - 25.4%]	0.1911	0
GCF_900091775.1	Streptomyces sp. ScaeMP-e83	strain=ScaeMP-e83	79.013	22.9	[20.6 - 25.4%]	0.1911	0
GCF_000718235.1	Streptomyces griseus subsp. rhodochrous	strain=NRRL B-2932	79.0125	23.3	[21 - 25.8%]	0.1876	0
GCF_003248355.1	Streptomyces sp. AC1-42W	strain=AC1-42W	79.0101	22.8	[20.5 - 25.3%]	0.192	0
GCF_002382885.1	Streptomyces sp. WZ.A104	strain=WZ.A104	79.0073	23	[20.7 - 25.5%]	0.1902	0
GCF_000515055.1	Streptomyces sp. CNR698	strain=CNR698	79.0064	23.3	[21 - 25.8%]	0.1876	0
GCF_009865545.1	Streptomyces sp. SID2563	strain=SID2563	79.0056	23.2	[20.9 - 25.6%]	0.189	0
GCF_000156695.2	Streptomyces filamentosus NRRL 11379	strain=NRRL 11379	79.0052	23.1	[20.8 - 25.6%]	0.1893	0
GCF_000717645.1	Streptomyces californicus	strain=NRRL B-2098	79.003	23.3	[21 - 25.8%]	0.1876	0
GCF_001746315.1	Streptomyces sp. EN27	strain=EN27	79.0029	22.9	[20.6 - 25.4%]	0.1909	0
GCF_007829885.1	Streptomyces brevispora	strain=DSM 42059	79.0018	23	[20.7 - 25.4%]	0.1907	0
GCF_001905645.1	Streptomyces sp. CB02115	strain=CB02115	79.0012	22.9	[20.6 - 25.3%]	0.1916	0
GCF_001746305.1	Streptomyces sp. EN23	strain=EN23	78.9989	22.8	[20.5 - 25.3%]	0.1918	0
GCF_013167915.1	Streptomyces microflavus	strain=NBRC 13062	78.9964	22.8	[20.5 - 25.3%]	0.1919	0
GCF_000718695.1	Streptomyces californicus	strain=NRRL ISP-5083	78.996	23.3	[21 - 25.7%]	0.1879	0
GCF_002551185.1	Streptomyces sp. sk226	strain=sk226	78.9927	23.5	[21.2 - 25.9%]	0.1864	0
GCF_013363675.1	Streptomyces sp. CAI-24	strain=CAI-24	78.9926	23	[20.7 - 25.5%]	0.1901	0
GCF_000377525.1	Streptomyces sp. CNT302	strain=CNT302	78.9911	23.3	[21 - 25.8%]	0.1876	0
GCF_001279735.1	Streptomyces sp. MMG1522	strain=MMG1522	78.9905	23.3	[21 - 25.8%]	0.1874	0
GCF_013364315.1	Streptomyces fulvissimus	strain=NA06532	78.9899	22.7	[20.5 - 25.2%]	0.1925	0
GCF_003846255.1	Streptomyces sp. ADI98-10	strain=ADI98-10	78.9894	22.9	[20.7 - 25.4%]	0.1908	0
GCF_002154385.1	Streptomyces albovinaceus	strain=NRRL B-2566	78.9887	23.1	[20.8 - 25.5%]	0.1896	0
GCF_003627815.1	Streptomyces hundungensis	strain=BH38	78.9883	23	[20.8 - 25.5%]	0.1899	0
GCF_014748275.1	Streptomyces sp. SP18CM02	strain=SP18CM02	78.9875	23.3	[21.1 - 25.8%]	0.1873	0
GCF_003263925.1	Streptomyces badius	strain=SP6C4	78.9862	22.9	[20.6 - 25.4%]	0.1911	0
GCF_900091905.1	Streptomyces sp. OspMP-M43	strain=OspMP-M43	78.986	23.5	[21.2 - 25.9%]	0.1865	0
GCF_003367645.1	Streptomyces sp. IB2014 011-12	strain=IB2014 011-12	78.9816	22.9	[20.6 - 25.4%]	0.1909	0
GCF_000935135.2	Streptomyces sp. MNU77	strain=MNU77	78.9814	23.1	[20.8 - 25.5%]	0.1896	0
GCF_001983595.1	Streptomyces sp. IB2014 011-1	strain=IB2014 011-1	78.9795	22.9	[20.6 - 25.4%]	0.1909	0
GCF_011751035.1	Streptomyces sp. MBT27	strain=MBT27	78.9787	23	[20.7 - 25.4%]	0.1906	0
GCF_002551055.1	Streptomyces sp. wa1002	strain=wa1002	78.9764	23.2	[21 - 25.7%]	0.1882	0
GCF_001751305.1	Streptomyces nanshensis	strain=SCSIO M10372	78.9763	23.3	[21 - 25.8%]	0.1876	0
GCF_004334925.1	Streptomyces sp. IBTA2	strain=IBTA2	78.9754	23.2	[20.9 - 25.6%]	0.1887	0
GCF_009872565.1	Streptomyces sp. SID5614	strain=SID5614	78.9752	23.2	[20.9 - 25.6%]	0.1889	0
GCF_000719925.1	Streptomyces sp. NRRL F-2202	strain=NRRL F-2202	78.9746	23.2	[20.9 - 25.7%]	0.1883	0
GCF_000721515.1	Streptomyces sp. NRRL F-5193	strain=NRRL F-5193	78.9728	22.8	[20.5 - 25.2%]	0.1923	0
GCF_009865075.1	Streptomyces sp. SID8369	strain=SID8369	78.9727	23.2	[20.9 - 25.7%]	0.1885	0
GCF_900090135.1	Streptomyces sp. LaPpAH-199	strain=LaPpAH-199	78.9727	23.2	[20.9 - 25.7%]	0.1885	0
GCF_014649955.1	Streptomyces violascens	strain=JCM 4424	78.9725	22.6	[20.3 - 25.1%]	0.1938	0
GCF_007096885.1	Streptomyces sp. 130	strain=130	78.9722	22.9	[20.6 - 25.3%]	0.1913	0
GCF_009866455.1	Streptomyces griseus	strain=CGMCC 4.18	78.9717	23	[20.7 - 25.5%]	0.1902	0
GCF_000177175.2	Streptomyces sp. ACT-1	strain=XylebKG-1	78.9708	23	[20.7 - 25.5%]	0.19	0
GCF_009863155.1	Streptomyces sp. SID4928	strain=SID4928	78.9708	23	[20.7 - 25.5%]	0.19	0
GCF_000720065.1	Streptomyces sp. NRRL F-3273	strain=NRRL F-3273	78.9703	23.3	[21 - 25.8%]	0.1875	0
GCF_000718135.1	Streptomyces cyaneofuscatus	strain=NRRL B-2570	78.97	22.9	[20.6 - 25.4%]	0.1912	0
GCF_000385945.1	Streptomyces fulvissimus DSM 40593	strain=DSM 40593	78.9681	22.8	[20.5 - 25.2%]	0.1922	0
GCF_003268675.1	Streptomyces bacillaris	strain=ATCC 15855	78.9671	23.1	[20.8 - 25.6%]	0.1892	0
GCF_011055525.1	Streptomyces sp. 196(2019)	strain=196	78.9657	23.2	[20.9 - 25.7%]	0.1885	0
GCF_000719195.1	Streptomyces californicus	strain=NRRL B-2895	78.9591	23.3	[21 - 25.8%]	0.1875	0
GCF_000716935.1	Streptomyces alboviridis	strain=NRRL B-1579	78.9555	22.7	[20.4 - 25.2%]	0.1929	0
GCF_003989035.1	Streptomyces sp. NP10	strain=NP10	78.954	22.9	[20.6 - 25.4%]	0.1912	0
GCF_001905705.1	Streptomyces sp. CB02460	strain=CB02460	78.9536	22.6	[20.4 - 25.1%]	0.1934	0
GCF_000719035.1	Streptomyces griseus subsp. rhodochrous	strain=NRRL B-1691	78.9528	23.4	[21.1 - 25.8%]	0.1872	0
GCF_014281035.1	Streptomyces sp. CBG31	strain=CBG31	78.9527	23.2	[20.9 - 25.7%]	0.1886	0
GCF_002803085.1	Streptomyces sp. CB01201	strain=CB01201	78.9526	22.8	[20.6 - 25.3%]	0.1918	0
GCF_002551415.1	Streptomyces sp. f51	strain=f51	78.9522	23.2	[20.9 - 25.7%]	0.1886	0
GCF_010548165.1	Streptomyces cyaneofuscatus	strain=SID10855	78.9494	22.9	[20.6 - 25.3%]	0.1914	0
GCF_008042045.1	Streptomyces sp. t39	strain=t39	78.9487	23	[20.7 - 25.5%]	0.1902	0
GCF_009872615.1	Streptomyces sp. SID5594	strain=SID5594	78.9476	22.8	[20.5 - 25.2%]	0.1923	0
GCF_000725705.1	Streptomyces sp. NRRL S-623	strain=NRRL S-623	78.9474	22.7	[20.4 - 25.1%]	0.1933	0
GCF_013018355.1	Streptomyces sp. PKU-MA01144	strain=PKU-MA01144	78.9474	23.4	[21.1 - 25.8%]	0.1873	0
GCF_000373405.1	Streptomyces sp. ScaeMP-e10	strain=ScaeMP-e10	78.9471	22.8	[20.5 - 25.2%]	0.1923	0
GCF_000720055.1	Streptomyces sp. NRRL F-3218	strain=NRRL F-3218	78.9459	23.3	[21 - 25.8%]	0.1877	0
GCF_002551235.1	Streptomyces sp. rh195	strain=rh195	78.9404	23.1	[20.8 - 25.5%]	0.1898	0
GCF_000721175.1	Streptomyces anulatus	strain=NRRL B-2873	78.9398	23.1	[20.8 - 25.5%]	0.1898	0
GCF_002910875.1	Streptomyces sp. SM13	strain=SM13	78.938	23.1	[20.8 - 25.5%]	0.1898	0
GCF_003501885.1	Streptomyces globisporus	strain=1912-4Crt	78.9361	23	[20.7 - 25.5%]	0.1901	0
GCF_002777535.1	Streptomyces peucetius subsp. caesius ATCC 27952	strain=ATCC 27952	78.9356	22.8	[20.5 - 25.2%]	0.1921	0
GCF_014649035.1	Streptomyces sindenensis	strain=JCM 4164	78.9354	22.9	[20.6 - 25.3%]	0.1912	0
GCF_001484625.1	Streptomyces kanasensis	strain=ZX01	78.9349	23.3	[21 - 25.7%]	0.188	0
GCF_004795015.1	Streptomyces sp. A1277	strain=A1277	78.9339	23	[20.7 - 25.4%]	0.1907	0
GCF_014648875.1	Streptomyces parvus	strain=JCM 4069	78.9336	22.9	[20.6 - 25.3%]	0.1913	0
GCF_000932225.2	Streptomyces griseus	strain=S4-7	78.9335	22.9	[20.6 - 25.4%]	0.1911	0
GCF_002910985.1	Streptomyces sp. B188M101	strain=B188M101	78.9333	23.3	[21.1 - 25.8%]	0.1874	0
GCF_002910935.1	Streptomyces sp. B226SN101	strain=B226SN101	78.9309	23.3	[21 - 25.8%]	0.1876	0
GCF_001418625.1	Streptomyces luridiscabiei	strain=NRRL B-24455	78.9297	22.9	[20.6 - 25.4%]	0.191	0
GCF_000718915.1	Streptomyces sp. NRRL WC-3540	strain=NRRL WC-3540	78.9296	23.4	[21.1 - 25.8%]	0.1872	0
GCF_003725745.1	Streptomyces sp. I6	strain=I6	78.9292	23.2	[21 - 25.7%]	0.1882	0
GCF_001905405.1	Streptomyces sp. TSRI0445	strain=TSRI0445	78.9266	22.9	[20.6 - 25.3%]	0.1913	0
GCF_002551065.1	Streptomyces sp. t99	strain=t99	78.9262	23	[20.7 - 25.5%]	0.1902	0
GCF_000365385.1	Streptomyces sp. CNS615	strain=CNS615	78.9244	23.4	[21.1 - 25.8%]	0.1873	0
GCF_002832675.1	Streptomyces sp. S063	strain=S063	78.9238	23	[20.7 - 25.4%]	0.1906	0
GCF_013409565.1	Streptomyces fulvorobeus	strain=DSM 41455	78.9207	22.9	[20.6 - 25.3%]	0.1915	0
GCF_008932075.1	Streptomyces sp. TRM68085	strain=TRM68085	78.9197	22.9	[20.6 - 25.3%]	0.1915	0
GCF_014596475.1	Streptomyces sp. CBMA152	strain=CBMA152	78.9194	22.9	[20.6 - 25.3%]	0.1916	0
GCF_900092005.1	Streptomyces sp. Cmuel-A718b	strain=Cmuel-A718b	78.9193	23	[20.7 - 25.4%]	0.1905	0
GCF_013167895.1	Streptomyces fulvorobeus	strain=NBRC 15897	78.9192	22.9	[20.6 - 25.3%]	0.1915	0
GCF_014650075.1	Streptomyces microflavus	strain=JCM 4496	78.9188	22.7	[20.4 - 25.1%]	0.1933	0
GCF_002551045.1	Streptomyces sp. wa1063	strain=wa1063	78.9181	23.3	[21 - 25.7%]	0.188	0
GCF_002551295.1	Streptomyces sp. or3	strain=or3	78.9179	23	[20.7 - 25.4%]	0.1907	0
GCF_003116675.1	Streptomyces sp. CS090A	strain=CS090A	78.9161	22.9	[20.6 - 25.4%]	0.1911	0
GCF_000717665.1	Streptomyces californicus	strain=NRRL 2423	78.915	23.3	[21.1 - 25.8%]	0.1874	0
GCF_014655335.1	Streptomyces griseus	strain=JCM 4516	78.9112	22.9	[20.6 - 25.3%]	0.1913	0
GCF_002551015.1	Streptomyces sp. wa1071	strain=wa1071	78.9085	23.3	[21.1 - 25.8%]	0.1873	0
GCF_014649875.1	Streptomyces rubiginosohelvolus	strain=JCM 4415	78.9073	22.8	[20.6 - 25.3%]	0.1918	0
GCF_002551175.1	Streptomyces sp. st77	strain=st77	78.9052	23	[20.7 - 25.4%]	0.1904	0
GCF_003263885.1	Streptomyces badius	strain=SF7B6	78.9042	22.9	[20.6 - 25.4%]	0.1911	0
GCF_002551225.1	Streptomyces sp. rh206	strain=rh206	78.9026	23.1	[20.8 - 25.5%]	0.1895	0
GCF_000719355.1	Streptomyces griseus subsp. griseus	strain=NRRL F-5144	78.9003	22.9	[20.6 - 25.3%]	0.1914	0
GCF_002633395.1	Streptomyces sp. ScaeMP-e48	strain=ScaeMP-e48	78.9002	22.7	[20.5 - 25.2%]	0.1926	0
GCF_001895105.1	Streptomyces sp. NBRC 110465	strain=NBRC 110465	78.8999	23	[20.7 - 25.5%]	0.1903	0
GCF_900105705.1	Streptomyces griseus	strain=DSM 40236	78.8999	23.1	[20.8 - 25.5%]	0.1895	0
GCF_001418495.1	Streptomyces pathocidini	strain=NRRL B-24287	78.8977	23.1	[20.8 - 25.5%]	0.1896	0
GCF_000719655.1	Streptomyces sp. NRRL B-1381	strain=NRRL B-1381	78.8972	23.3	[21 - 25.7%]	0.188	0
GCF_014489615.1	Streptomyces sp. CRPJ-33	strain=CRPJ-33	78.8947	23.2	[20.9 - 25.7%]	0.1883	0
GCF_900460065.1	Streptomyces griseus	strain=NCTC13033	78.8941	23.1	[20.8 - 25.6%]	0.1892	0
GCF_000717795.1	Streptomyces griseus subsp. griseus	strain=NRRL WC-3480	78.8938	23	[20.7 - 25.4%]	0.1907	0
GCF_003259625.1	Streptomyces sp. KhCrAH-43	strain=KhCrAH-43	78.8912	22.6	[20.3 - 25.1%]	0.1937	0
GCF_000702365.1	Streptomyces sp. CNS654	strain=CNS654	78.8906	22.8	[20.6 - 25.3%]	0.1917	0
GCF_010550605.1	Streptomyces sp. SID9727	strain=SID9727	78.8892	23.1	[20.8 - 25.6%]	0.1893	0
GCF_002551215.1	Streptomyces sp. rh207	strain=rh207	78.8881	23.1	[20.8 - 25.6%]	0.1891	0
GCF_900105515.1	Streptomyces sp. 2131.1	strain=2131.1	78.8879	22.9	[20.6 - 25.3%]	0.1914	0
GCF_003024215.1	Streptomyces sp. CS149	strain=CS149	78.8866	23	[20.7 - 25.4%]	0.1905	0
GCF_000721935.1	Streptomyces sp. NRRL WC-3549	strain=NRRL WC-3549	78.8865	23.3	[21 - 25.8%]	0.1875	0
GCF_001427565.1	Streptomyces sp. Root63	strain=Root63	78.8864	22.9	[20.6 - 25.3%]	0.1913	0
GCF_900119365.1	Streptomyces atratus	strain=OK807	78.886	22.8	[20.5 - 25.2%]	0.1924	0
GCF_014649695.1	Streptomyces kurssanovii	strain=JCM 4388	78.884	22.8	[20.5 - 25.2%]	0.1923	0
GCF_002551105.1	Streptomyces sp. st170	strain=st170	78.8839	23.1	[20.9 - 25.6%]	0.189	0
GCF_001279425.1	Streptomyces sp. NRRL F-2295	strain=NRRL F-2295	78.8828	23.4	[21.1 - 25.8%]	0.1873	0
GCF_014650455.1	Streptomyces xanthochromogenes	strain=JCM 4612	78.8806	22.8	[20.5 - 25.2%]	0.1925	0
GCF_009834665.1	Streptomyces fradiae ATCC 10745 = DSM 40063	strain=ATCC 10745	78.8795	23.8	[21.5 - 26.2%]	0.1838	0
GCF_002910905.1	Streptomyces sp. SM11	strain=SM11	78.8792	23	[20.7 - 25.4%]	0.1906	0
GCF_003116755.1	Streptomyces sp. CS131	strain=CS131	78.8766	23	[20.7 - 25.4%]	0.1906	0
GCF_003116775.1	Streptomyces sp. CS147	strain=CS147	78.8766	22.9	[20.7 - 25.4%]	0.1908	0
GCF_001278075.1	Streptomyces pristinaespiralis	strain=HCCB 10218	78.8758	22.8	[20.5 - 25.3%]	0.1919	0
GCF_003402595.1	Streptomyces spongiicola	strain=531S	78.8734	23.2	[20.9 - 25.7%]	0.1884	0
GCF_002551305.1	Streptomyces sp. or20	strain=or20	78.8733	22.9	[20.6 - 25.3%]	0.1913	0
GCF_002154345.1	Streptomyces fimicarius	strain=NRRL ISP-5322	78.873	23.2	[20.9 - 25.7%]	0.1885	0
GCF_005795905.1	Streptomyces sp. ICN19	strain=ICN19	78.8724	23.1	[20.8 - 25.5%]	0.1898	0
GCF_000716945.1	Streptomyces albus subsp. albus	strain=NRRL B-16041	78.8723	22.9	[20.6 - 25.4%]	0.1912	0
GCF_008632535.1	Streptomyces parvus	strain=NRRL B-1455	78.8691	23	[20.8 - 25.5%]	0.1899	0
GCF_001434355.1	Streptomyces anulatus	strain=ATCC 11523	78.8674	23	[20.7 - 25.5%]	0.19	0
GCF_001905575.1	Streptomyces sp. CB00072	strain=CB00072	78.867	22.9	[20.6 - 25.4%]	0.1912	0
GCF_010548215.1	Streptomyces sp. SID10815	strain=SID10815	78.8663	23.5	[21.2 - 26%]	0.1859	0
GCF_002551345.1	Streptomyces sp. ms115	strain=ms115	78.8661	23.1	[20.8 - 25.5%]	0.1897	0
GCF_003147545.1	Streptomyces globisporus	strain=TFH56	78.8659	22.9	[20.6 - 25.4%]	0.1911	0
GCF_000717105.1	Streptomyces anulatus	strain=NRRL B-3362	78.8651	23.1	[20.8 - 25.5%]	0.1898	0
GCF_000745675.1	Streptomyces atratus	strain=OK008	78.8623	22.7	[20.5 - 25.2%]	0.1926	0
GCF_002551145.1	Streptomyces sp. st115	strain=st115	78.8613	23.1	[20.9 - 25.6%]	0.1891	0
GCF_010548505.1	Streptomyces sp. SID14515	strain=SID14515	78.861	22.9	[20.7 - 25.4%]	0.1908	0
GCF_002551135.1	Streptomyces sp. st140	strain=st140	78.8584	23.2	[20.9 - 25.7%]	0.1885	0
GCF_002705685.1	Streptomyces sp. Ncost-T6T-1	strain=Ncost-T6T-1	78.8578	22.9	[20.6 - 25.3%]	0.1915	0
GCF_900090085.1	Streptomyces sp. Ncost-T6T-1	strain=Ncost-T6T-1	78.8578	22.9	[20.6 - 25.3%]	0.1915	0
GCF_001189025.1	Streptomyces europaeiscabiei	strain=NCPPB 4064	78.8569	23	[20.7 - 25.4%]	0.1905	0
GCF_014651015.1	Streptomyces xantholiticus	strain=JCM 4863	78.8559	22.6	[20.4 - 25.1%]	0.1934	0
GCF_002907485.1	Streptomyces sp. ZL-24	strain=ZL-24	78.8556	22.9	[20.6 - 25.4%]	0.191	0
GCF_000717215.1	Streptomyces vinaceus	strain=NRRL ISP-5257	78.8543	23.3	[21 - 25.8%]	0.1878	0
GCF_000718615.1	Streptomyces purpeochromogenes	strain=NRRL ISP-5373	78.8542	23.3	[21 - 25.8%]	0.1876	0
GCF_001905785.1	Streptomyces sp. CB02130	strain=CB02130	78.8524	23	[20.7 - 25.4%]	0.1907	0
GCF_010550365.1	Streptomyces sp. SID7958	strain=SID7958	78.8515	23	[20.7 - 25.5%]	0.1903	0
GCF_002551475.1	Streptomyces sp. b62	strain=b62	78.8498	22.9	[20.7 - 25.4%]	0.1909	0
GCF_009865065.1	Streptomyces sp. SID8373	strain=SID8373	78.8478	22.6	[20.3 - 25%]	0.1939	0
GCF_009864905.1	Streptomyces sp. SID8378	strain=SID8378	78.8469	22.9	[20.6 - 25.3%]	0.1914	0
GCF_011766325.1	Streptomyces sp. CWH03	strain=CWH03	78.8465	23.2	[20.9 - 25.7%]	0.1883	0
GCF_900187925.1	Streptomyces sp. PgraA7	strain=PgraA7	78.8447	22.9	[20.6 - 25.3%]	0.1914	0
GCF_005234185.1	Streptomyces sp. BPSDS2	strain=BPSDS2	78.842	22.8	[20.5 - 25.3%]	0.1919	0
GCF_014650395.1	Streptomyces pluricolorescens	strain=JCM 4602	78.8381	22.8	[20.5 - 25.3%]	0.1918	0
GCF_000010605.1	Streptomyces griseus subsp. griseus NBRC 13350	strain=NBRC 13350	78.8376	23.1	[20.8 - 25.5%]	0.1895	0
GCF_009862245.1	Streptomyces sp. SID7816	strain=SID7816	78.8376	23.1	[20.8 - 25.5%]	0.1895	0
GCF_000716025.1	Streptomyces baarnensis	strain=NRRL B-2842	78.8336	23	[20.7 - 25.5%]	0.1902	0
GCF_003173645.1	Streptomyces sp. FT05W	strain=FT05W	78.832	23.6	[21.3 - 26.1%]	0.1848	0
GCF_004345865.1	Streptomyces sp. BK438	strain=BK438	78.8313	22.7	[20.5 - 25.2%]	0.1926	0
GCF_009025935.1	Streptomyces sp. C8S0		78.8279	23.2	[20.9 - 25.7%]	0.1884	0
GCF_000377965.1	Streptomyces sp. CNB091	strain=CNB091	78.8278	23.1	[20.8 - 25.6%]	0.1892	0
GCF_900103455.1	Streptomyces wuyuanensis	strain=CGMCC 4.7042	78.8273	22.7	[20.5 - 25.2%]	0.1927	0
GCF_009862635.1	Streptomyces sp. SID724	strain=SID724	78.8255	23.4	[21.1 - 25.9%]	0.1866	0
GCF_001426615.1	Streptomyces sp. Root1319	strain=Root1319	78.8241	22.6	[20.4 - 25.1%]	0.1934	0
GCF_000718455.1	Streptomyces globisporus subsp. globisporus	strain=NRRL B-2709	78.8223	22.8	[20.5 - 25.3%]	0.192	0
GCF_014070435.1	Streptomyces pristinaespiralis	strain=PR11	78.8219	22.8	[20.5 - 25.3%]	0.1919	0
GCF_001687325.1	Streptomyces sp. PTY087I2	strain=PTY087I2	78.8211	22.9	[20.6 - 25.4%]	0.1911	0
GCF_001905905.1	Streptomyces sp. CB02366	strain=CB02366	78.8205	23.2	[20.9 - 25.6%]	0.1887	0
GCF_001723115.1	Streptomyces griseus	strain=NRRL B-2165	78.817	23.4	[21.1 - 25.8%]	0.1872	0
GCF_013363655.1	Streptomyces sp. CAI 127	strain=CAI 127	78.8155	23.2	[20.9 - 25.6%]	0.1889	0
GCF_009862475.1	Streptomyces sp. SID4940	strain=SID4940	78.8104	22.6	[20.4 - 25.1%]	0.1935	0
GCF_900091715.1	Streptomyces sp. DpondAA-F4a	strain=DpondAA-F4a	78.8104	22.6	[20.4 - 25.1%]	0.1936	0
GCF_000375725.1	Streptomyces sp. LaPpAH-95	strain=LaPpAH-95	78.81	22.4	[20.2 - 24.9%]	0.1953	0
GCF_009863265.1	Streptomyces sp. SID4923	strain=SID4923	78.81	22.4	[20.2 - 24.9%]	0.1953	0
GCF_014649555.1	Streptomyces globisporus	strain=JCM 4378	78.8098	22.8	[20.5 - 25.3%]	0.1918	0
GCF_002551435.1	Streptomyces sp. f150	strain=f150	78.8089	23	[20.7 - 25.4%]	0.1907	0
GCF_000721685.1	Streptomyces mediolani	strain=NRRL WC-3934	78.8073	22.9	[20.6 - 25.3%]	0.1914	0
GCF_014650675.1	Streptomyces anulatus	strain=JCM 4721	78.8066	22.8	[20.5 - 25.2%]	0.1921	0
GCF_001426325.1	Streptomyces sp. Root1295	strain=Root1295	78.8065	22.9	[20.6 - 25.3%]	0.1913	0
GCF_013363665.1	Streptomyces sp. CAI-68	strain=CAI-68	78.8048	23	[20.7 - 25.4%]	0.1906	0
GCF_000743295.1	Streptomyces sp. JS01	strain=JS01	78.8035	23	[20.7 - 25.4%]	0.1905	0
GCF_000719575.1	Streptomyces sp. NRRL S-1824	strain=NRRL S-1824	78.7991	22.7	[20.4 - 25.1%]	0.1932	0
GCF_003116685.1	Streptomyces sp. CS014	strain=CS014	78.7966	22.9	[20.6 - 25.3%]	0.1915	0
GCF_001746285.1	Streptomyces sp. EN16	strain=EN16	78.7962	23	[20.7 - 25.5%]	0.1902	0
GCF_003751445.1	Streptomyces sp. 840.1	strain=840.1	78.7945	22.9	[20.6 - 25.4%]	0.1911	0
GCF_008042035.1	Streptomyces sp. col6	strain=col6	78.7917	22.7	[20.4 - 25.2%]	0.1928	0
GCF_013363455.1	Streptomyces sp. CAI-121	strain=CAI-121	78.7875	23	[20.7 - 25.4%]	0.1906	0
GCF_002551375.1	Streptomyces sp. gb14	strain=gb14	78.7861	23.1	[20.8 - 25.5%]	0.1897	0
GCF_009832925.1	Streptomyces sp. Tu 2975	strain=Tu 2975	78.7813	22.9	[20.6 - 25.4%]	0.191	0
GCF_000239075.1	Streptomyces sp. W007	strain=W007	78.7788	23	[20.7 - 25.4%]	0.1905	0
GCF_001905735.1	Streptomyces sp. CB01249	strain=CB01249	78.7788	22.6	[20.3 - 25%]	0.1942	0
GCF_000373525.1	Streptomyces sp. LaPpAH-165	strain=LaPpAH-165	78.7758	22.4	[20.1 - 24.9%]	0.1956	0
GCF_003752275.1	Streptomyces sp. CEV 2-1	strain=CEV 2-1	78.7737	22.8	[20.5 - 25.2%]	0.1921	0
GCF_002551465.1	Streptomyces sp. b84	strain=b84	78.7722	23	[20.7 - 25.5%]	0.1901	0
GCF_009865425.1	Streptomyces sp. SID3915	strain=SID3915	78.7688	22.8	[20.5 - 25.3%]	0.1918	0
GCF_009863275.1	Streptomyces sp. SID4920	strain=SID4920	78.7683	22.6	[20.3 - 25.1%]	0.1937	0
GCF_002242735.1	Streptomyces sp. 2R	strain=2R	78.7658	22.7	[20.5 - 25.2%]	0.1926	0
GCF_006715635.1	Streptomyces sp. SLBN-118	strain=SLBN-118	78.76	22.8	[20.5 - 25.2%]	0.1923	0
GCF_000177195.2	Streptomyces sp. SirexAA-E	strain=SirexAA-E	78.758	22.7	[20.4 - 25.1%]	0.1933	0
GCF_009865465.1	Streptomyces sp. SID1	strain=SID1	78.758	22.7	[20.4 - 25.1%]	0.1933	0
GCF_002910815.1	Streptomyces sp. FM008	strain=FM008	78.756	23.6	[21.3 - 26%]	0.1856	0
GCF_001748305.1	Streptomyces luteocolor	strain=NBRC 13826	78.7479	22.7	[20.5 - 25.2%]	0.1926	0
GCF_008180165.1	Streptomyces parvus	strain=C05	78.7452	23.1	[20.8 - 25.6%]	0.1893	0
GCF_014649535.1	Streptomyces gelaticus	strain=JCM 4376	78.7447	22.7	[20.5 - 25.2%]	0.1926	0
GCF_900090075.1	Streptomyces sp. MnatMP-M77	strain=MnatMP-M77	78.742	22.9	[20.6 - 25.3%]	0.1915	0
GCF_003846175.1	Streptomyces sp. ADI95-17	strain=ADI95-17	78.7416	22.7	[20.4 - 25.2%]	0.1928	0
GCF_004795105.1	Streptomyces sp. A0642	strain=A0642	78.7389	22.9	[20.6 - 25.3%]	0.1914	0
GCF_009862415.1	Streptomyces sp. SID8364	strain=SID8364	78.7385	22.9	[20.6 - 25.3%]	0.1915	0
GCF_900101975.1	Streptomyces sp. 136MFCol5.1	strain=136MFCol5.1	78.7353	22.6	[20.3 - 25%]	0.1941	0
GCF_009865405.1	Streptomyces sp. SID3212	strain=SID3212	78.7325	22.9	[20.6 - 25.4%]	0.191	0
GCF_001905125.1	Streptomyces sp. TSRI0281	strain=TSRI0281	78.7273	23	[20.7 - 25.5%]	0.1903	0
GCF_900091875.1	Streptomyces sp. BpilaLS-43	strain=BpilaLS-43	78.7258	22.7	[20.4 - 25.1%]	0.1931	0
GCF_001905795.1	Streptomyces sp. CB01580	strain=CB01580	78.7252	23.3	[21 - 25.8%]	0.1875	0
GCF_001715295.1	Streptomyces griseus	strain=BIG105	78.723	22.8	[20.5 - 25.3%]	0.1918	0
GCF_001419745.1	Streptomyces silaceus	strain=NRRL B-24166	78.7229	22.9	[20.6 - 25.3%]	0.1915	0
GCF_008042275.1	Streptomyces sp. or43	strain=or43	78.7184	23	[20.7 - 25.4%]	0.1905	0
GCF_001642995.1	Streptomyces jeddahensis	strain=G25	78.7154	23	[20.7 - 25.4%]	0.1907	0
GCF_001865255.1	Streptomyces sp. CC77	strain=CC77	78.7113	23.5	[21.2 - 25.9%]	0.1863	0
GCF_000698495.1	Streptomyces sp. NTK 937	strain=NTK 937	78.7086	23	[20.7 - 25.4%]	0.1907	0
GCF_003116795.1	Streptomyces sp. CS207	strain=CS207	78.7044	22.6	[20.3 - 25%]	0.194	0
GCF_002910795.1	Streptomyces sp. SM9	strain=SM9	78.699	23.6	[21.3 - 26.1%]	0.185	0
GCF_009863165.1	Streptomyces sp. SID4939	strain=SID4939	78.6963	22.6	[20.3 - 25%]	0.1939	0
GCF_900095575.1	Streptomyces sp. DpondAA-F4	strain=DpondAA-F4	78.6963	22.6	[20.3 - 25%]	0.1942	0
GCF_004127445.1	Streptomyces alfalfae	strain=XY25	78.6942	22.7	[20.4 - 25.2%]	0.1927	0
GCF_002910915.1	Streptomyces sp. SM10	strain=SM10	78.6829	22.8	[20.5 - 25.2%]	0.1922	0
GCF_000722185.1	Streptomyces sp. NRRL S-15	strain=NRRL S-15	78.6822	23	[20.7 - 25.5%]	0.19	0
GCF_000470535.1	Streptomyces sp. AW19M42		78.6789	22.9	[20.6 - 25.3%]	0.1916	0
GCF_000162775.1	Streptomyces sp. e14	strain=e14	78.6788	23.6	[21.3 - 26%]	0.1854	0
GCF_001865245.1	Streptomyces sp. CC53	strain=CC53	78.677	23.1	[20.9 - 25.6%]	0.1891	0
GCF_010550405.1	Streptomyces rochei	strain=SID8161	78.6728	23.1	[20.8 - 25.5%]	0.1897	0
GCF_003259575.1	Streptomyces sp. DpondAA-A50	strain=DpondAA-A50	78.6658	22.4	[20.2 - 24.9%]	0.1953	0
GCF_009862045.1	Streptomyces sp. SID8360	strain=SID8360	78.6658	22.4	[20.2 - 24.9%]	0.1953	0
GCF_003573485.1	Streptomyces fradiae	strain=NKZ-259	78.6638	22.7	[20.5 - 25.2%]	0.1926	0
GCF_003259275.1	Streptomyces sp. DpondAA-E10	strain=DpondAA-E10	78.661	22.5	[20.2 - 24.9%]	0.1949	0
GCF_011193355.1	Streptomyces sp. JB150	strain=JB150	78.6608	22.8	[20.6 - 25.3%]	0.1917	0
GCF_014207445.1	Streptomyces candidus	strain=DSM 40141	78.6567	22.9	[20.6 - 25.3%]	0.1915	0
GCF_010550645.1	Streptomyces sp. SID9913	strain=SID9913	78.6555	22.9	[20.6 - 25.4%]	0.191	0
GCF_010548075.1	Streptomyces sp. SID10115	strain=SID10115	78.6534	22.6	[20.3 - 25.1%]	0.1937	0
GCF_010548175.1	Streptomyces halstedii	strain=SID11342	78.6532	23.3	[21 - 25.7%]	0.1881	0
GCF_009862055.1	Streptomyces sp. SID8358	strain=SID8358	78.6513	22.5	[20.2 - 24.9%]	0.195	0
GCF_003253495.1	Streptomyces sp. ScaeMP-e122	strain=ScaeMP-e122	78.6503	22.5	[20.2 - 24.9%]	0.195	0
GCF_001047315.1	Streptomyces leeuwenhoekii	strain=C58	78.6495	22.7	[20.4 - 25.1%]	0.193	0
GCF_004010275.1	Streptomyces huasconensis	strain=HST28	78.6466	22.8	[20.5 - 25.2%]	0.1924	0
GCF_001905365.1	Streptomyces sp. CB02488	strain=CB02488	78.6452	22.8	[20.5 - 25.3%]	0.192	0
GCF_008042065.1	Streptomyces sp. gb1(2016)	strain=gb1(2016)	78.6332	22.7	[20.4 - 25.2%]	0.1929	0
GCF_010548385.1	Streptomyces coelicoflavus	strain=SID14163	78.6327	22.8	[20.5 - 25.2%]	0.1924	0
GCF_001975025.1	Streptomyces alfalfae	strain=ACCC40021	78.6296	22.7	[20.4 - 25.2%]	0.1927	0
GCF_000721715.1	Streptomyces sp. NRRL B-24720	strain=NRRL B-24720	78.6281	22.6	[20.3 - 25%]	0.1941	0
GCF_010550505.1	Streptomyces sp. SID8499	strain=SID8499	78.6248	23.6	[21.3 - 26.1%]	0.1852	0
GCF_000382745.1	Streptomyces sp. DvalAA-83	strain=DvalAA-83	78.6197	22.5	[20.2 - 24.9%]	0.1947	0
GCF_009862105.1	Streptomyces sp. SID8357	strain=SID8357	78.6197	22.5	[20.2 - 24.9%]	0.1947	0
GCF_900091745.1	Streptomyces sp. DpondAA-D4	strain=DpondAA-D4	78.6144	22.9	[20.6 - 25.3%]	0.1916	0
GCF_004125315.1	Streptomyces sp. M3	strain=M3	78.6137	22.6	[20.4 - 25.1%]	0.1935	0
GCF_900090065.1	Streptomyces sp. OspMP-M45	strain=OspMP-M45	78.6104	22.8	[20.5 - 25.3%]	0.1921	0
GCF_004217285.1	Streptomyces sp. BK239	strain=BK239	78.6101	22.4	[20.1 - 24.8%]	0.1957	0
GCF_000719775.1	Streptomyces sp. NRRL F-5135	strain=NRRL F-5135	78.6096	23.7	[21.4 - 26.2%]	0.1844	0
GCF_000721185.1	Streptomyces griseolus	strain=NRRL B-2925	78.6092	22.8	[20.5 - 25.3%]	0.1919	0
GCF_000720535.1	Streptomyces halstedii	strain=NRRL ISP-5068	78.608	22.8	[20.5 - 25.3%]	0.192	0
GCF_010548145.1	Streptomyces sp. SID10853	strain=SID10853	78.6062	22.8	[20.5 - 25.2%]	0.1922	0
GCF_010550435.1	Streptomyces sp. SID8111	strain=SID8111	78.6051	22.6	[20.3 - 25%]	0.1939	0
GCF_009863235.1	Streptomyces sp. SID4925	strain=SID4925	78.6038	22.8	[20.5 - 25.3%]	0.1921	0
GCF_000373645.1	Streptomyces sp. ATexAB-D23	strain=ATexAB-D23	78.6011	22.5	[20.2 - 25%]	0.1946	0
GCF_009865325.1	Streptomyces sp. SID4913	strain=SID4913	78.6011	22.5	[20.2 - 25%]	0.1946	0
GCF_002705695.1	Streptomyces sp. OspMP-M45	strain=OspMP-M45	78.6005	22.8	[20.5 - 25.3%]	0.1921	0
GCF_000158975.1	Streptomyces griseoflavus Tu4000	strain=Tu4000	78.5956	22.6	[20.3 - 25.1%]	0.1937	0
GCF_014216315.1	Streptomyces finlayi	strain=NBSH44	78.5948	22.8	[20.5 - 25.3%]	0.1921	0
GCF_004798575.1	Streptomyces sp. A1499	strain=A1499	78.5945	22.6	[20.3 - 25.1%]	0.1938	0
GCF_000931445.1	Streptomyces cyaneogriseus subsp. noncyanogenus	strain=NMWT 1	78.5912	22.7	[20.4 - 25.2%]	0.1927	0
GCF_008704555.1	Streptomyces nitrosporeus	strain=ATCC 12769	78.591	23	[20.7 - 25.4%]	0.1907	0
GCF_009862465.1	Streptomyces sp. SID4941	strain=SID4941	78.5889	23	[20.7 - 25.5%]	0.1903	0
GCF_900091765.1	Streptomyces sp. PalvLS-984	strain=PalvLS-984	78.5889	23	[20.7 - 25.5%]	0.1903	0
GCF_008704515.1	Streptomyces viridosporus T7A	strain=ATCC 39115	78.5888	22.5	[20.2 - 24.9%]	0.1951	0
GCF_007858555.1	Streptomyces sp. WAC06273	strain=WAC6273 substr. delta orf15 pCRISPR-Cas9	78.5882	22.6	[20.3 - 25%]	0.1942	0
GCF_000514055.1	Streptomyces griseolus	strain=DpondAA-B6	78.5855	22.7	[20.4 - 25.2%]	0.1928	0
GCF_009865365.1	Streptomyces sp. SID4912	strain=SID4912	78.5855	22.7	[20.4 - 25.2%]	0.1928	0
GCF_900091835.1	Streptomyces sp. PpalLS-921	strain=PpalLS-921	78.5815	22.9	[20.6 - 25.4%]	0.191	0
GCF_003254205.1	Streptomyces sp. DvalAA-21	strain=DvalAA-21	78.5806	22.5	[20.2 - 24.9%]	0.1949	0
GCF_003846155.1	Streptomyces sp. ADI93-02	strain=ADI93-02	78.5803	22.6	[20.3 - 25.1%]	0.1937	0
GCF_003846195.1	Streptomyces sp. ADI92-24	strain=ADI92-24	78.5787	22.6	[20.3 - 25%]	0.1939	0
GCF_002910895.1	Streptomyces sp. SM5	strain=SM5	78.5782	23	[20.7 - 25.5%]	0.1901	0
GCF_000761215.1	Streptomyces glaucescens	strain=GLA.O	78.5767	22.6	[20.3 - 25.1%]	0.1936	0
GCF_001700505.1	Streptomyces mutomycini	strain=NRRL B-65393	78.5733	22.5	[20.3 - 25%]	0.1944	0
GCF_002892485.1	Streptomyces diastaticus	strain=deep-sea A18	78.5724	22.7	[20.5 - 25.2%]	0.1925	0
GCF_010548465.1	Streptomyces sp. SID14436	strain=SID14436	78.5718	22.6	[20.3 - 25.1%]	0.1936	0
GCF_002711365.1	Streptomyces sp. LamerLS-316	strain=LamerLS-316	78.5691	22.5	[20.2 - 24.9%]	0.1951	0
GCF_009863285.1	Streptomyces sp. SID4921	strain=SID4921	78.5691	22.5	[20.2 - 24.9%]	0.1951	0
GCF_014655855.1	Streptomyces candidus	strain=JCM 4629	78.5656	22.8	[20.5 - 25.2%]	0.1923	0
GCF_009872595.1	Streptomyces sp. SID5477	strain=SID5477	78.5614	22.9	[20.6 - 25.4%]	0.1911	0
GCF_900116325.1	Streptomyces sp. ok210	strain=OK210	78.5604	22.5	[20.3 - 25%]	0.1944	0
GCF_000241835.1	Streptomyces coelicoflavus ZG0656	strain=ZG0656	78.5595	22.9	[20.6 - 25.4%]	0.1911	0
GCF_001279695.1	Streptomyces sp. WM6378	strain=WM6378	78.5414	22.8	[20.5 - 25.2%]	0.1924	0
GCF_004212445.1	Streptomyces alfalfae	strain=XY25	78.5406	22.7	[20.4 - 25.1%]	0.1932	0
GCF_003846275.1	Streptomyces sp. ADI97-07	strain=ADI97-07	78.5364	22.6	[20.3 - 25%]	0.1941	0
GCF_009908195.1	Streptomyces boluensis	strain=YC537	78.5356	22.6	[20.3 - 25%]	0.1941	0
GCF_008369065.1	Streptomyces sp. SUN51	strain=SUN51	78.5351	22.8	[20.5 - 25.3%]	0.1918	0
GCF_002910775.2	Streptomyces sp. SM18	strain=SM18	78.5341	22.9	[20.6 - 25.3%]	0.1916	0
GCF_900090115.1	Streptomyces sp. AmelKG-A3	strain=AmelKG-A3	78.5323	22.7	[20.4 - 25.2%]	0.1928	0
GCF_014650375.1	Streptomyces nitrosporeus	strain=JCM 4598	78.5322	22.8	[20.6 - 25.3%]	0.1917	0
GCF_003346515.1	Streptomyces corynorhini	strain=AC230	78.5248	23	[20.7 - 25.4%]	0.1906	0
GCF_000364805.1	Streptomyces sp. PAMC 26508	strain=PAMC 26508	78.5227	22.6	[20.4 - 25.1%]	0.1935	0
GCF_014252945.1	Streptomyces mexicanus	strain=Marseille-Q0842	78.522	23	[20.7 - 25.4%]	0.1905	0
GCF_004524875.1	Streptomyces sp. S501	strain=S501	78.5195	22.6	[20.3 - 25%]	0.1941	0
GCF_013870595.1	Streptomyces sp. WELS2	strain=WELS2	78.5192	23.2	[20.9 - 25.7%]	0.1884	0
GCF_001905505.1	Streptomyces sp. CB02058	strain=CB02058	78.5172	22.6	[20.3 - 25%]	0.1941	0
GCF_009852415.1	Streptomyces sp. Tu 3180	strain=Tu 3180	78.515	22.7	[20.4 - 25.1%]	0.1932	0
GCF_014656095.1	Streptomyces longispororuber	strain=JCM 4784	78.5145	23.3	[21 - 25.8%]	0.1877	0
GCF_900091725.1	Streptomyces sp. DvalAA-43	strain=DvalAA-43	78.5119	22.8	[20.5 - 25.2%]	0.1921	0
GCF_009863125.1	Streptomyces sp. SID4936	strain=SID4936	78.511	22.8	[20.5 - 25.3%]	0.192	0
GCF_000720405.1	Streptomyces sp. NRRL B-24051	strain=NRRL B-24051	78.5106	22.6	[20.3 - 25%]	0.1942	0
GCF_007829855.1	Streptomyces argenteolus	strain=3259	78.5092	22.6	[20.3 - 25.1%]	0.1936	0
GCF_009600895.1	Streptomyces katsurahamanus	strain=T-272	78.5046	23.4	[21.2 - 25.9%]	0.1865	0
GCF_014650875.1	Streptomyces minutiscleroticus	strain=JCM 4790	78.5026	23.2	[20.9 - 25.6%]	0.189	0
GCF_009916105.1	Streptomyces sp. GC420	strain=GC420	78.5017	22.9	[20.6 - 25.4%]	0.1911	0
GCF_014852645.1	Streptomyces sp. H28	strain=H28	78.5008	22.5	[20.2 - 24.9%]	0.1948	0
GCF_012328665.1	Streptomyces galbus	strain=I339	78.4998	22.6	[20.3 - 25.1%]	0.1936	0
GCF_014650575.1	Streptomyces naganishii JCM 4654	strain=JCM 4654	78.4884	22.6	[20.3 - 25%]	0.1942	0
GCF_003268965.1	Streptomyces avidinii	strain=CG 885	78.4852	22.4	[20.2 - 24.9%]	0.1952	0
GCF_014651135.1	Streptomyces echinoruber	strain=JCM 5016	78.4852	22.8	[20.6 - 25.3%]	0.1916	0
GCF_000717945.1	Streptomyces sp. NRRL S-920	strain=NRRL S-920	78.4838	22.4	[20.1 - 24.8%]	0.1961	0
GCF_002005565.1	Streptomyces sp. JHA26	strain=JHA26	78.48	22.5	[20.2 - 24.9%]	0.1949	0
GCF_002277855.1	Streptomyces sp. Alain-F2R5	strain=Alain-F2R5	78.4759	22.6	[20.4 - 25.1%]	0.1934	0
GCF_001509505.1	Streptomyces sp. NRRL S-1521	strain=NRRL S-1521	78.4726	22.6	[20.4 - 25.1%]	0.1935	0
GCF_014203535.1	Streptomyces griseostramineus	strain=CECT 3273	78.4722	22.5	[20.2 - 24.9%]	0.195	0
GCF_001905845.1	Streptomyces sp. TSRI0107	strain=TSRI0107	78.4698	22.5	[20.2 - 24.9%]	0.1952	0
GCF_001427245.1	Streptomyces sp. Root55	strain=Root55	78.4693	22.7	[20.4 - 25.1%]	0.1931	0
GCF_010550325.1	Streptomyces rubrogriseus	strain=SID7739	78.468	22.8	[20.5 - 25.2%]	0.1923	0
GCF_014697945.1	Streptomyces pratensis	strain=SFW	78.4658	22.6	[20.4 - 25.1%]	0.1935	0
GCF_006716135.1	Streptomyces asterosporus	strain=DSM 41452	78.4639	22.6	[20.3 - 25%]	0.194	0
GCF_002114215.1	Streptomyces sp. 13-12-16	strain=13-12-16	78.4621	22.9	[20.6 - 25.3%]	0.1915	0
GCF_003945545.1	Streptomyces sp. WAC 01529	strain=WAC 01529	78.4599	22.6	[20.3 - 25%]	0.1941	0
GCF_000972435.1	Streptomyces sp. MBT28	strain=MBT28	78.4555	22.6	[20.3 - 25.1%]	0.1938	0
GCF_003950055.1	Streptomyces sp. KPB2	strain=KPB2	78.448	22.5	[20.2 - 25%]	0.1946	0
GCF_000720675.1	Streptomyces sp. NRRL WC-3795	strain=NRRL WC-3795	78.4459	22.4	[20.2 - 24.9%]	0.1953	0
GCF_014203555.1	Streptomyces olivoverticillatus	strain=CECT 3266	78.4459	22.2	[20 - 24.7%]	0.1972	0
GCF_003949505.1	Streptomyces sp. WAC00469	strain=WAC00469	78.4458	22.7	[20.4 - 25.2%]	0.1929	0
GCF_009862125.1	Streptomyces sp. SID5910	strain=SID5910	78.4446	22.8	[20.5 - 25.3%]	0.192	0
GCF_008704395.1	Streptomyces alboniger	strain=ATCC 12461	78.4437	22.5	[20.2 - 25%]	0.1947	0
GCF_011008945.1	Streptomyces sp. PRKS01-65	strain=PRKS01-65	78.4408	22.8	[20.5 - 25.2%]	0.1922	0
GCF_004151105.1	Streptomyces sp. L-9-10	strain=L-9-10	78.4397	22.6	[20.4 - 25.1%]	0.1936	0
GCF_013778455.1	Streptomyces sp. PSKA28	strain=PSKA28	78.4368	23.1	[20.8 - 25.6%]	0.1891	0
GCF_004364245.1	Streptomyces sp. BK208	strain=BK208	78.4367	22.4	[20.2 - 24.9%]	0.1954	0
GCF_001693675.1	Streptomyces clavuligerus	strain=F613-1	78.4347	23.3	[21 - 25.7%]	0.1881	0
GCF_014596915.1	Streptomyces sp. TRM68416	strain=TRM68416	78.4338	22.5	[20.3 - 25%]	0.1945	0
GCF_007829875.1	Streptomyces capillispiralis	strain=DSM 41695	78.4336	22.5	[20.2 - 24.9%]	0.1952	0
GCF_000720395.1	Streptomyces flavovirens	strain=NRRL B-2182	78.4315	22.5	[20.3 - 25%]	0.1945	0
GCF_009864865.1	Streptomyces sp. SID8381	strain=SID8381	78.4312	23.1	[20.8 - 25.6%]	0.1894	0
GCF_014649595.1	Streptomyces griseomycini	strain=JCM 4382	78.4304	22.5	[20.2 - 24.9%]	0.1948	0
GCF_014649635.1	Streptomyces griseostramineus	strain=JCM 4385	78.4303	22.5	[20.2 - 24.9%]	0.195	0
GCF_009862365.1	Streptomyces sp. SID7815	strain=SID7815	78.4302	22.6	[20.3 - 25%]	0.194	0
GCF_000383935.1	Streptomyces sp. Amel2xE9	strain=Amel2xE9	78.428	23.1	[20.8 - 25.6%]	0.1894	0
GCF_900207595.1	Streptomyces microflavus	strain=CG 893	78.4276	22.4	[20.2 - 24.9%]	0.1954	0
GCF_014701095.1	Streptomyces tuirus	strain=JCM 4255	78.4272	22.6	[20.3 - 25%]	0.1942	0
GCF_011694815.1	Streptomyces sp. QMT-12	strain=QMT-12	78.4267	22.7	[20.4 - 25.1%]	0.193	0
GCF_014650215.1	Streptomyces vinaceusdrappus	strain=JCM 4529	78.4245	22.4	[20.1 - 24.9%]	0.1956	0
GCF_014649395.1	Streptomyces aureoverticillatus	strain=JCM 4347	78.4238	22.8	[20.5 - 25.3%]	0.192	0
GCF_009863035.1	Streptomyces sp. SID4982	strain=SID4982	78.4197	22.6	[20.3 - 25%]	0.1939	0
GCF_002742045.1	Streptomyces sp. HG99	strain=HG99	78.4196	22.6	[20.3 - 25%]	0.1939	0
GCF_000772045.1	Streptomyces sp. CCM_MD2014	strain=CCM_MD2014	78.4168	22.4	[20.1 - 24.8%]	0.1959	0
GCF_000721595.1	Streptomyces sp. NRRL S-325	strain=NRRL S-325	78.4127	22.5	[20.2 - 24.9%]	0.1948	0
GCF_009739465.1	Streptomyces sp. TRM66233	strain=TRM66233	78.4115	22.6	[20.3 - 25%]	0.1939	0
GCF_009862515.1	Streptomyces sp. SID7804	strain=SID7804	78.4106	23	[20.8 - 25.5%]	0.19	0
GCF_000156435.1	Streptomyces viridosporus ATCC 14672	strain=ATCC 14672	78.4099	22.5	[20.3 - 25%]	0.1943	0
GCF_014138545.1	Streptomyces aureorectus	strain=DSM 41692	78.4095	22.7	[20.4 - 25.2%]	0.1927	0
GCF_014650975.1	Streptomyces thermoviolaceus subsp. thermoviolaceus	strain=JCM 4843	78.4071	22.5	[20.3 - 25%]	0.1944	0
GCF_000725645.1	Streptomyces sp. NRRL F-5635	strain=NRRL F-5635	78.4023	22.3	[20.1 - 24.8%]	0.1962	0
GCF_002154375.1	Streptomyces glaucescens	strain=NRRL B-2706	78.4022	22.7	[20.5 - 25.2%]	0.1926	0
GCF_002276245.1	Streptomyces sp. alain-838	strain=alain-838	78.4009	22.6	[20.3 - 25.1%]	0.1937	0
GCF_003984935.1	Streptomyces sp. WAC04189	strain=WAC04189	78.3993	22.5	[20.2 - 24.9%]	0.1951	0
GCF_003208035.1	Streptomyces actuosus	strain=ATCC 25421	78.3976	22.7	[20.5 - 25.2%]	0.1927	0
GCF_003687515.1	Streptomyces sp. S5	strain=S5	78.3971	23.2	[20.9 - 25.7%]	0.1884	0
GCF_009857135.1	Streptomyces sp. HM190	strain=HM190	78.3922	22.9	[20.6 - 25.3%]	0.1915	0
GCF_006782915.1	Streptomyces calvus	strain=T3018	78.3911	22.7	[20.4 - 25.1%]	0.1932	0
GCF_902506575.1	Streptomyces mexicanus	strain=Marseille-Q0842	78.3904	23	[20.7 - 25.4%]	0.1905	0
GCF_000717025.1	Streptomyces atroolivaceus	strain=NRRL ISP-5137	78.3897	22.6	[20.3 - 25%]	0.1942	0
GCF_013363575.1	Streptomyces sp. KAI 90	strain=KAI 90	78.3872	22.4	[20.1 - 24.8%]	0.1959	0
GCF_001419695.1	Streptomyces prasinopilosus	strain=NRRL B-2711	78.3853	23.3	[21 - 25.7%]	0.188	0
GCF_001632865.1	Streptomyces ambofaciens	strain=DSM 40697	78.3823	22.5	[20.2 - 24.9%]	0.1949	0
GCF_001414545.1	Streptomyces pactum	strain=ACT12	78.3818	22.4	[20.2 - 24.9%]	0.1953	0
GCF_002946835.1	Streptomyces dengpaensis	strain=XZHG99	78.3814	22.7	[20.5 - 25.2%]	0.1927	0
GCF_010548115.1	Streptomyces sp. SID10362	strain=SID10362	78.3813	22.6	[20.4 - 25.1%]	0.1934	0
GCF_006088715.1	Streptomyces sp. YIM 121038	strain=YIM 121038	78.3797	22.7	[20.4 - 25.2%]	0.1927	0
GCF_010548435.1	Streptomyces coelicoflavus	strain=SID14172	78.3777	22.7	[20.4 - 25.1%]	0.1932	0
GCF_001013905.1	Streptomyces leeuwenhoekii	strain=type strain (C34 = DSM 42122 = NRRL B-24963)	78.3761	22.6	[20.4 - 25.1%]	0.1935	0
GCF_014649155.1	Streptomyces griseoviridis	strain=JCM 4250	78.3729	22.4	[20.1 - 24.8%]	0.1958	0
GCF_001700515.1	Streptomyces lushanensis	strain=NRRL B-24994	78.3728	23	[20.7 - 25.5%]	0.19	0
GCF_000718095.1	Streptomyces scopuliridis RB72	strain=NRRL B-24574	78.3727	22.3	[20.1 - 24.8%]	0.1963	0
GCF_008642355.1	Streptomyces venezuelae	strain=ATCC 14583	78.3726	22.2	[19.9 - 24.7%]	0.1974	0
GCF_010548605.1	Streptomyces diastaticus	strain=SID7513	78.3723	22.5	[20.3 - 25%]	0.1945	0
GCF_000719015.1	Streptomyces ruber	strain=NRRL B-1661	78.3721	22.5	[20.2 - 25%]	0.1946	0
GCF_003369795.1	Streptomyces sp. CB09001	strain=CB09001	78.3712	22.5	[20.3 - 25%]	0.1943	0
GCF_015160875.1	Streptomyces chromofuscus	strain=DSM 40273	78.3712	22.7	[20.4 - 25.1%]	0.193	0
GCF_001905385.1	Streptomyces sp. CB02414	strain=CB02414	78.3711	22.4	[20.1 - 24.8%]	0.1959	0
GCF_013912435.1	Streptomyces sp. PSKA54	strain=PSKA54	78.3704	23.2	[20.9 - 25.6%]	0.1889	0
GCF_005490965.1	Streptomyces sp. SGAir0924	strain=SGAir0924	78.3662	22.5	[20.3 - 25%]	0.1945	0
GCF_000176115.2	Streptomyces pratensis ATCC 33331	strain=ATCC 33331	78.3652	22.6	[20.3 - 25%]	0.194	0
GCF_900290435.1	Streptomyces netropsis		78.3651	22.5	[20.2 - 25%]	0.1946	0
GCF_003073355.1	Streptomyces scopuliridis RB72	strain=RB72	78.3644	22.5	[20.2 - 24.9%]	0.1951	0
GCF_004005495.1	Streptomyces sp. San01	strain=San01	78.3629	22.5	[20.2 - 24.9%]	0.1951	0
GCF_014648815.1	Streptomyces flaveolus	strain=JCM 4032	78.3628	22.5	[20.2 - 24.9%]	0.1949	0
GCF_003344965.1	Streptomyces paludis	strain=GSSD-12	78.3611	22.8	[20.5 - 25.2%]	0.1921	0
GCF_011317205.1	Streptomyces sp. KO7888	strain=KO7888	78.3608	22.4	[20.2 - 24.9%]	0.1953	0
GCF_014648855.1	Streptomyces parvulus	strain=JCM 4068	78.3601	22.1	[19.8 - 24.5%]	0.1986	0
GCF_002939385.1	Streptomyces sp. MH60	strain=MH60	78.3599	22.4	[20.1 - 24.8%]	0.1958	0
GCF_001293595.1	Streptomyces sp. TP-A0875	strain=TP-A0875	78.3593	22.4	[20.1 - 24.8%]	0.1959	0
GCF_014649475.1	Streptomyces daghestanicus	strain=JCM 4365	78.3587	22.4	[20.2 - 24.9%]	0.1953	0
GCF_002300165.1	Streptomyces sp. Tue6028	strain=Tue6028	78.3563	22.5	[20.2 - 24.9%]	0.1949	0
GCF_002899455.1	Streptomyces sp. DH-12	strain=DH-12	78.3563	22.6	[20.3 - 25%]	0.1941	0
GCF_000716215.1	Streptomyces resistomycificus	strain=NRRL ISP-5133	78.3561	22.7	[20.4 - 25.1%]	0.1933	0
GCF_002155895.1	Streptomyces rochei	strain=NRRL B-2410	78.3512	22.7	[20.4 - 25.1%]	0.1932	0
GCF_000158935.1	Streptomyces lividans TK24	strain=TK24	78.3497	22.4	[20.2 - 24.9%]	0.1952	0
GCF_012933395.1	Streptomyces sp. GMY01	strain=GMY01	78.3496	23.2	[20.9 - 25.7%]	0.1885	0
GCF_001279355.1	Streptomyces sp. NRRL F-4711	strain=NRRL F-4711	78.3485	22.4	[20.1 - 24.8%]	0.196	0
GCF_014649255.1	Streptomyces thermoviolaceus subsp. apingens	strain=JCM 4312	78.3479	22.7	[20.4 - 25.1%]	0.1931	0
GCF_010550625.1	Streptomyces albidoflavus	strain=SID9939	78.3473	23	[20.7 - 25.4%]	0.1906	0
GCF_014621695.1	Streptomyces sp. CRXT-Y-14	strain=CRXT-Y-14	78.3452	22.6	[20.3 - 25%]	0.1943	0
GCF_009864985.1	Streptomyces sp. SID8385	strain=SID8385	78.3448	23	[20.7 - 25.5%]	0.1902	0
GCF_013364255.1	Streptomyces seoulensis	strain=A01	78.3446	22.9	[20.6 - 25.3%]	0.1914	0
GCF_900100315.1	Streptomyces indicus	strain=CGMCC 4.5727	78.3443	22.5	[20.2 - 24.9%]	0.1948	0
GCF_004795715.1	Streptomyces sp. SS52	strain=SS52	78.3439	22.5	[20.3 - 25%]	0.1945	0
GCF_003330845.1	Streptomyces sp. Go-475	strain=Go-475	78.3419	22.8	[20.6 - 25.3%]	0.1918	0
GCF_002019855.1	Streptomyces antibioticus	strain=DSM 41481	78.3404	22.5	[20.2 - 24.9%]	0.1948	0
GCF_000696595.1	Streptomyces leeuwenhoekii	strain=C34	78.3399	22.7	[20.5 - 25.2%]	0.1926	0
GCF_003984925.1	Streptomyces sp. WAC08401	strain=WAC08401	78.3396	22.4	[20.1 - 24.8%]	0.1959	0
GCF_001509785.1	Streptomyces sp. NRRL WC-3604	strain=NRRL WC-3604	78.339	22.2	[19.9 - 24.7%]	0.1974	0
GCF_005280215.1	Streptomyces lasalocidi	strain=X-537	78.3385	22.7	[20.4 - 25.1%]	0.1933	0
GCF_012034235.1	Streptomyces thermoviolaceus subsp. thermoviolaceus	strain=NBRC 13905	78.3382	22.6	[20.4 - 25.1%]	0.1935	0
GCF_014650515.1	Streptomyces finlayi	strain=JCM 4637	78.3367	22.3	[20.1 - 24.8%]	0.1962	0
GCF_003665435.1	Streptomyces fungicidicus	strain=TXX3120	78.3358	22.4	[20.1 - 24.8%]	0.196	0
GCF_002188335.1	Streptomyces sp. CS159	strain=CS159	78.3354	22.5	[20.2 - 24.9%]	0.1949	0
GCF_002289335.1	Streptomyces albidoflavus	strain=132	78.3353	23	[20.8 - 25.5%]	0.1899	0
GCF_003949905.1	Streptomyces sp. WAC06273	strain=WAC06273	78.3338	22.5	[20.2 - 24.9%]	0.1952	0
GCF_014138735.1	Streptomyces calvus	strain=CECT 3271	78.333	22.5	[20.2 - 24.9%]	0.1947	0
GCF_003112575.1	Streptomyces diastaticus subsp. ardesiacus	strain=NBRC 15402	78.3319	22.4	[20.1 - 24.8%]	0.1958	0
GCF_003454755.1	Streptomyces clavuligerus	strain=F1D-5	78.33	23.3	[21 - 25.7%]	0.1881	0
GCF_009863005.1	Streptomyces sp. SID4956	strain=SID4956	78.3293	22.6	[20.3 - 25.1%]	0.1936	0
GCF_003330865.1	Streptomyces atratus	strain=SCSIO_ZH16	78.3289	22.5	[20.3 - 25%]	0.1943	0
GCF_008042155.1	Streptomyces sp. wa22	strain=wa22	78.328	22.7	[20.4 - 25.1%]	0.1933	0
GCF_007363395.1	Streptomyces spectabilis	strain=NRRL 2792	78.3259	22.6	[20.3 - 25%]	0.1941	0
GCF_002879675.2	Streptomyces sp. SMS_SU21	strain=SMS_SU21	78.3244	22.4	[20.1 - 24.8%]	0.1957	0
GCF_002128465.1	Streptomyces pharetrae CZA14	strain=CZA14	78.3238	22.6	[20.3 - 25%]	0.194	0
GCF_002920535.1	Streptomyces sp. Ru71	strain=Ru71	78.3234	22.5	[20.3 - 25%]	0.1944	0
GCF_002910825.1	Streptomyces sp. SM1	strain=SM1	78.323	22.9	[20.6 - 25.4%]	0.191	0
GCF_013364175.1	Streptomyces sp. NA02536	strain=NA02536	78.3223	22.3	[20.1 - 24.8%]	0.1962	0
GCF_014650815.1	Streptomyces flavofungini	strain=JCM 4753	78.3221	22.7	[20.4 - 25.2%]	0.1928	0
GCF_002941025.1	Streptomyces sp. QL37	strain=QL37	78.322	22.5	[20.2 - 24.9%]	0.1949	0
GCF_010548575.1	Streptomyces sp. SID339	strain=SID339	78.3219	22.3	[20 - 24.7%]	0.197	0
GCF_003664315.1	Streptomyces sp. 57	strain=57	78.3211	22.7	[20.5 - 25.2%]	0.1927	0
GCF_001267885.1	Streptomyces ambofaciens ATCC 23877	strain=ATCC 23877	78.3199	22.5	[20.2 - 24.9%]	0.195	0
GCF_000359525.1	Streptomyces albidoflavus	strain=J1074	78.3195	22.8	[20.5 - 25.2%]	0.1925	0
GCF_009862345.1	Streptomyces sp. SID7817	strain=SID7817	78.3195	22.8	[20.5 - 25.2%]	0.1925	0
GCF_001654495.1	Streptomyces sp. SAT1	strain=SAT1	78.3193	22.7	[20.4 - 25.1%]	0.1933	0
GCF_000721605.1	Streptomyces sp. NRRL S-37	strain=NRRL S-37	78.3166	22.5	[20.2 - 24.9%]	0.1951	0
GCF_003671675.1	Streptomyces sp. E2N171	strain=E2N171	78.3162	22.5	[20.2 - 24.9%]	0.195	0
GCF_013364375.1	Streptomyces sp. NA03103	strain=NA03103	78.3158	22.5	[20.2 - 24.9%]	0.1949	0
GCF_009862355.1	Streptomyces sp. SID7834	strain=SID7834	78.3153	22.7	[20.4 - 25.1%]	0.193	0
GCF_009865165.1	Streptomyces sp. SID335	strain=SID335	78.3145	22.4	[20.1 - 24.8%]	0.1959	0
GCF_001294345.1	Streptomyces sp. NRRL S-4	strain=NRRL S-4	78.3136	22.5	[20.2 - 25%]	0.1945	0
GCF_008642335.1	Streptomyces venezuelae	strain=ATCC 14585	78.3133	22.3	[20 - 24.7%]	0.1969	0
GCF_008632955.1	Streptomyces tendae	strain=139	78.3127	22.4	[20.1 - 24.8%]	0.1959	0
GCF_002156055.1	Streptomyces viridochromogenes	strain=NRRL B-24167	78.3104	22.3	[20 - 24.8%]	0.1964	0
GCF_005519465.1	Streptomyces clavuligerus	strain=ATCC 27064	78.3101	23.3	[21 - 25.7%]	0.188	0
GCF_014651055.1	Streptomyces cinereoruber subsp. fructofermentans	strain=JCM 4956	78.3092	22.6	[20.3 - 25%]	0.1942	0
GCF_014650415.1	Streptomyces spiroverticillatus	strain=JCM 4609	78.3078	22.4	[20.1 - 24.8%]	0.1959	0
GCF_001279605.1	Streptomyces sp. NRRL F-4707	strain=NRRL F-4707	78.307	22.4	[20.1 - 24.8%]	0.1958	0
GCF_002189675.2	Streptomyces alboflavus	strain=MDJK44	78.3063	22.6	[20.3 - 25.1%]	0.1936	0
GCF_000739045.1	Streptomyces luteus	strain=TRM 45540	78.3057	22.5	[20.2 - 24.9%]	0.195	0
GCF_002192455.1	Streptomyces albireticuli	strain=MDJK11	78.3044	22.9	[20.6 - 25.3%]	0.1913	0
GCF_000259895.1	Streptomyces sp. TOR3209	strain=TOR3209	78.3005	22.6	[20.3 - 25%]	0.194	0
GCF_014656055.1	Streptomyces griseosporeus	strain=JCM 4766	78.297	22.5	[20.3 - 25%]	0.1943	0
GCF_014649135.1	Streptomyces niveoruber	strain=JCM 4234	78.2968	22.4	[20.2 - 24.9%]	0.1953	0
GCF_012034205.1	Streptomyces sp. SBST2-5	strain=SBST2-5	78.2964	22.5	[20.2 - 24.9%]	0.195	0
GCF_008704795.1	Streptomyces spectabilis	strain=ATCC 27465	78.2953	22.6	[20.3 - 25%]	0.194	0
GCF_000148465.1	Streptomyces clavuligerus	strain=ATCC 27064	78.2939	23.2	[20.9 - 25.7%]	0.1883	0
GCF_001418395.1	Streptomyces prasinopilosus	strain=NRRL B-24621	78.2937	23.2	[20.9 - 25.7%]	0.1883	0
GCF_000725575.1	Streptomyces ruber	strain=NRRL ISP-5378	78.2934	22.4	[20.2 - 24.9%]	0.1953	0
GCF_006715925.1	Streptomyces sp. SLBN-134	strain=SLBN-134	78.2932	22.3	[20.1 - 24.8%]	0.1961	0
GCF_014655295.1	Streptomyces fumanus	strain=JCM 4477	78.2927	22.5	[20.2 - 24.9%]	0.1952	0
GCF_003344905.1	Streptomyces parvulus	strain=2297	78.2922	22.3	[20 - 24.7%]	0.197	0
GCF_003984965.1	Streptomyces sp. WAC06128	strain=WAC06128	78.2909	22.4	[20.1 - 24.9%]	0.1955	0
GCF_014854025.1	Streptomyces sp. VITNK9	strain=VITNK9	78.2905	22.3	[20 - 24.7%]	0.1969	0
GCF_000719665.1	Streptomyces sp. NRRL F-5555	strain=NRRL F-5555	78.2901	22.4	[20.1 - 24.8%]	0.1959	0
GCF_900091955.1	Streptomyces sp. Ncost-T10-10d	strain=Ncost-T10-10d	78.2892	22.6	[20.3 - 25%]	0.194	0
GCF_001509795.1	Streptomyces sp. NRRL WC-3605	strain=NRRL WC-3605	78.2889	22.2	[19.9 - 24.7%]	0.1974	0
GCF_001660045.1	Streptomyces parvulus	strain=2297	78.2848	22.2	[20 - 24.7%]	0.197	0
GCF_014649315.1	Streptomyces calvus	strain=JCM 4326	78.2839	22.6	[20.3 - 25%]	0.1943	0
GCF_002891295.1	Streptomyces eurocidicus	strain=ATCC 27428	78.283	22.9	[20.7 - 25.4%]	0.1908	0
GCF_003671715.1	Streptomyces sp. E2N166	strain=E2N166	78.2828	22.6	[20.3 - 25%]	0.1941	0
GCF_000709915.1	Streptomyces griseorubens	strain=JSD-1	78.2816	22.5	[20.3 - 25%]	0.1943	0
GCF_001270505.1	Streptomyces resistomycificus	strain=NRRL 2290	78.2794	22.3	[20 - 24.7%]	0.1968	0
GCF_003949835.1	Streptomyces sp. WAC02707	strain=WAC02707	78.2784	22.6	[20.3 - 25.1%]	0.1937	0
GCF_004684775.1	Streptomyces sp. MZ04	strain=MZ04	78.2774	22.5	[20.2 - 25%]	0.1947	0
GCF_014656315.1	Streptomyces capillispiralis	strain=JCM 5075	78.2774	22.3	[20 - 24.7%]	0.1968	0
GCF_005280195.1	Streptomyces galbus	strain=DSM 40089	78.2702	22.3	[20.1 - 24.8%]	0.1963	0
GCF_003270085.1	Streptomyces triticisoli	strain=NEAU-DSCPA1-4-4	78.2699	22.5	[20.2 - 25%]	0.1947	0
GCF_002289305.1	Streptomyces albidoflavus	strain=145	78.2689	23	[20.7 - 25.4%]	0.1906	0
GCF_004522685.1	Streptomyces sp. H23	strain=H23	78.2689	22.4	[20.1 - 24.8%]	0.196	0
GCF_009495655.1	Streptomyces sp. SYP-A7193	strain=SYP-A7193	78.2687	22.5	[20.2 - 25%]	0.1947	0
GCF_002150845.1	Streptomyces alboverticillatus	strain=NRRL B-24281	78.2686	23	[20.7 - 25.5%]	0.1902	0
GCF_900091895.1	Streptomyces sp. IgraMP-1	strain=IgraMP-1	78.2681	22.9	[20.6 - 25.4%]	0.1911	0
GCF_000719815.1	Streptomyces sp. NRRL F-5065	strain=NRRL F-5065	78.2652	22.3	[20.1 - 24.8%]	0.1961	0
GCF_003984975.1	Streptomyces sp. WAC08452	strain=WAC08452	78.2643	22.4	[20.1 - 24.9%]	0.1954	0
GCF_000720505.1	Streptomyces sp. NRRL S-146	strain=NRRL S-146	78.2637	22.8	[20.5 - 25.2%]	0.1922	0
GCF_014651095.1	Streptomyces geysiriensis	strain=JCM 4962	78.2605	22.4	[20.2 - 24.9%]	0.1954	0
GCF_014649055.1	Streptomyces gancidicus	strain=JCM 4171	78.2604	22.2	[19.9 - 24.6%]	0.1976	0
GCF_000716675.1	Streptomyces alboflavus	strain=NRRL B-2373	78.2601	22.4	[20.2 - 24.9%]	0.1952	0
GCF_013177615.1	Streptomyces sp. MNP-20	strain=MNP-20	78.2598	22.7	[20.4 - 25.2%]	0.1929	0
GCF_001595515.1	Streptomyces sp. CC71	strain=CC71	78.2584	22.4	[20.1 - 24.8%]	0.1957	0
GCF_001418325.1	Streptomyces atriruber	strain=NRRL B-24165	78.2581	22.4	[20.1 - 24.8%]	0.196	0
GCF_900101585.1	Streptomyces prasinopilosus	strain=CGMCC 4.3504	78.256	22.7	[20.4 - 25.2%]	0.193	0
GCF_003671735.1	Streptomyces sp. E1N211	strain=E1N211	78.2559	22.5	[20.2 - 25%]	0.1945	0
GCF_008704575.1	Streptomyces galilaeus	strain=ATCC 14969	78.2549	22.4	[20.1 - 24.8%]	0.1961	0
GCF_013307045.1	Streptomyces coelicolor	strain=M1154/pAMX4	78.2538	22.4	[20.1 - 24.9%]	0.1955	0
GCF_013693715.1	Streptomyces albidoflavus	strain=J1074/R2	78.2531	22.8	[20.5 - 25.2%]	0.1925	0
GCF_014655195.1	Streptomyces cellulosae	strain=JCM 4462	78.253	22.2	[19.9 - 24.6%]	0.1975	0
GCF_000725495.1	Streptomyces aureus	strain=NRRL B-1941	78.2514	22.8	[20.5 - 25.2%]	0.1923	0
GCF_011650445.1	Streptomyces sp. VN1	strain=VN1	78.2512	22.4	[20.2 - 24.9%]	0.1954	0
GCF_003984905.1	Streptomyces sp. WAC05458	strain=WAC05458	78.2502	22.4	[20.2 - 24.9%]	0.1953	0
GCF_014648655.1	Streptomyces atratus	strain=JCM 3386	78.2487	22.4	[20.1 - 24.9%]	0.1956	0
GCF_008124975.1	Streptomyces coelicolor	strain=A3(2) R4-mCherry-17	78.2483	22.3	[20.1 - 24.8%]	0.1961	0
GCF_005406005.1	Streptomyces avermitilis	strain=cw2	78.2478	22.7	[20.5 - 25.2%]	0.1926	0
GCF_000721335.1	Streptomyces sp. NRRL S-1831	strain=NRRL S-1831	78.2472	22.4	[20.1 - 24.8%]	0.1958	0
GCF_009600885.1	Streptomyces jumonjinensis	strain=NRRL 5741	78.2472	23.3	[21 - 25.8%]	0.1877	0
GCF_001579685.1	Streptomyces scabiei	strain=96-06	78.2466	23.3	[21 - 25.8%]	0.1874	0
GCF_003146615.1	Streptomyces sp. NWU49	strain=NWU49	78.2455	22.3	[20 - 24.7%]	0.1968	0
GCF_001514215.1	Streptomyces bungoensis	strain=DSM 41781	78.2452	22.3	[20.1 - 24.8%]	0.1962	0
GCF_010384365.1	Streptomyces sp. S4.7	strain=S4.7	78.2452	22.3	[20.1 - 24.8%]	0.1961	0
GCF_000316095.1	Streptomyces viridosporus T7A	strain=T7A	78.2433	22.4	[20.1 - 24.8%]	0.1958	0
GCF_014654935.1	Streptomyces capoamus	strain=JCM 4253	78.2417	22.2	[19.9 - 24.7%]	0.1973	0
GCF_009862825.1	Streptomyces sp. SID5473	strain=SID5473	78.2411	23.2	[20.9 - 25.7%]	0.1883	0
GCF_001279615.1	Streptomyces sp. NRRL F-7442	strain=NRRL F-7442	78.2404	22.4	[20.1 - 24.8%]	0.1959	0
GCF_000163875.1	Streptomyces clavuligerus	strain=ATCC 27064	78.2399	23.3	[21.1 - 25.8%]	0.1873	0
GCF_002911015.1	Streptomyces populi	strain=A249	78.2392	22.8	[20.5 - 25.2%]	0.1921	0
GCF_008642315.1	Streptomyces venezuelae	strain=ATCC 14584	78.2391	22.2	[19.9 - 24.7%]	0.1974	0
GCF_000527195.1	Streptomyces sp. CNH189	strain=CNH189	78.2387	22.2	[20 - 24.7%]	0.1973	0
GCF_002813405.1	Streptomyces sp. 69	strain=69	78.2386	22.5	[20.2 - 25%]	0.1946	0
GCF_000717995.1	Streptomyces violaceorubidus	strain=NRRL B-16381	78.2385	22.3	[20 - 24.8%]	0.1964	0
GCF_014650135.1	Streptomyces plicatus	strain=JCM 4504	78.2385	22.5	[20.2 - 24.9%]	0.1951	0
GCF_000739105.1	Streptomyces lividans TK24	strain=TK24	78.2367	22.5	[20.2 - 25%]	0.1946	0
GCF_900104935.1	Streptomyces sp. 2114.2	strain=2114.2	78.2356	22.5	[20.2 - 25%]	0.1947	0
GCF_004368945.1	Streptomyces coelicolor	strain=O-10.2	78.2352	22.3	[20.1 - 24.8%]	0.1961	0
GCF_009863025.1	Streptomyces sp. SID4985	strain=SID4985	78.2306	22.9	[20.6 - 25.4%]	0.1911	0
GCF_003363195.1	Streptomyces sp. M7	strain=M7	78.2293	22.3	[20.1 - 24.8%]	0.1963	0
GCF_900079415.1	Streptomyces sp. F-7		78.229	22.2	[19.9 - 24.6%]	0.1975	0
GCF_012184365.1	Streptomyces sp. S-2	strain=S-2	78.227	22.8	[20.5 - 25.3%]	0.192	0
GCF_002009175.1	Streptomyces niveus	strain=SCSIO 3406	78.2247	22.4	[20.2 - 24.9%]	0.1954	0
GCF_008124905.1	Streptomyces coelicolor	strain=A3(2) R4-mCherry-14	78.2227	22.4	[20.1 - 24.8%]	0.1961	0
GCF_008039505.1	Streptomyces sp. IB2014 016-6	strain=IB2014 016-6	78.2219	22.3	[20 - 24.7%]	0.1968	0
GCF_004798565.1	Streptomyces sp. Akac8	strain=Akac8	78.2217	22.3	[20.1 - 24.8%]	0.1963	0
GCF_014648835.1	Streptomyces netropsis	strain=JCM 4063	78.2205	22.6	[20.3 - 25%]	0.194	0
GCF_014649935.1	Streptomyces variabilis	strain=JCM 4422	78.2199	22.2	[19.9 - 24.6%]	0.1974	0
GCF_003698085.1	Streptomyces sp. ZS0098	strain=ZS0098	78.2165	22.1	[19.8 - 24.5%]	0.1987	0
GCF_001445655.1	Streptomyces sp. MBT76	strain=MBT76	78.2163	22.7	[20.4 - 25.1%]	0.1932	0
GCF_008124965.1	Streptomyces coelicolor	strain=A3(2) R4-mCherry-19	78.2154	22.4	[20.1 - 24.8%]	0.196	0
GCF_014650535.1	Streptomyces galbus	strain=JCM 4639	78.2151	22.3	[20 - 24.7%]	0.1966	0
GCF_002154615.1	Streptomyces recifensis	strain=NRRL B-3811	78.2145	22.5	[20.2 - 24.9%]	0.1952	0
GCF_001014595.1	Streptomyces sp. KE1	strain=KE1	78.213	22.4	[20.2 - 24.9%]	0.1953	0
GCF_009739225.1	Streptomyces sp. Z38	strain=Z38	78.213	22.4	[20.1 - 24.8%]	0.1957	0
GCF_009498275.1	Streptomyces sp. QMT-28	strain=QMT-28	78.212	22.7	[20.4 - 25.2%]	0.1929	0
GCF_002251155.1	Streptomyces sp. FBKL.4005	strain=FBKL.4005	78.2112	22.5	[20.2 - 25%]	0.1947	0
GCF_003112555.1	Streptomyces coelicoflavus	strain=NBRC 15399	78.2111	22.3	[20.1 - 24.8%]	0.1963	0
GCF_003403055.1	Streptomyces sp. AcE210	strain=AcE210	78.211	22.3	[20.1 - 24.8%]	0.1961	0
GCF_000720325.1	Streptomyces sp. NRRL B-1347	strain=NRRL B-1347	78.2104	22.5	[20.2 - 25%]	0.1947	0
GCF_000725745.1	Streptomyces aureocirculatus	strain=NRRL ISP-5401	78.2104	22.8	[20.5 - 25.3%]	0.1921	0
GCF_004124325.1	Streptomyces sp. L2	strain=L2	78.2094	22.6	[20.3 - 25.1%]	0.1938	0
GCF_001417695.1	Streptomyces sp. JHA19	strain=JHA19	78.2076	22.3	[20.1 - 24.8%]	0.1961	0
GCF_007828695.1	Streptomyces sp. T12	strain=T12	78.2073	22.2	[19.9 - 24.6%]	0.1978	0
GCF_008973465.1	Streptomyces sp. SS1-1	strain=SS1-1	78.2053	22.6	[20.3 - 25%]	0.1942	0
GCF_003074055.1	Streptomyces nigra	strain=452	78.2049	22.3	[20.1 - 24.8%]	0.1962	0
GCF_900177255.1	Streptomyces sp. Amel2xC10	strain=Amel2xC10	78.2038	22.3	[20 - 24.8%]	0.1964	0
GCF_002005225.1	Streptomyces pactum	strain=ACT12	78.2029	22.4	[20.2 - 24.9%]	0.1953	0
GCF_013317105.1	Streptomyces coelicolor	strain=M1154/pAMX4/pGP1416	78.2028	22.5	[20.3 - 25%]	0.1945	0
GCF_008125035.1	Streptomyces coelicolor	strain=A3(2) R4-mCherry-18	78.202	22.3	[20.1 - 24.8%]	0.1961	0
GCF_001417775.1	Streptomyces sp. TP-A0356	strain=TP-A0356	78.2019	22.7	[20.4 - 25.2%]	0.1927	0
GCF_014202475.1	Streptomyces paradoxus	strain=DSM 43350	78.2011	22.2	[20 - 24.7%]	0.1973	0
GCF_009865595.1	Streptomyces sp. SID1328	strain=SID1328	78.2009	22.8	[20.5 - 25.3%]	0.1921	0
GCF_014651115.1	Streptomyces inusitatus	strain=JCM 4988	78.2006	22.6	[20.3 - 25%]	0.1941	0
GCF_000403665.1	Streptomyces lividans 1326	strain=1326	78.1998	22.4	[20.2 - 24.9%]	0.1952	0
GCF_002078175.1	Streptomyces sp. M41(2017)	strain=M41	78.1998	22.7	[20.4 - 25.1%]	0.193	0
GCF_002317005.1	Streptomyces albidoflavus	strain=38	78.1987	23	[20.7 - 25.5%]	0.1902	0
GCF_008124985.1	Streptomyces coelicolor	strain=A3(2) R4-mCherry-15	78.1986	22.4	[20.1 - 24.8%]	0.1961	0
GCF_014534645.1	Streptomyces sp. TRM S81-3	strain=TRM S81-3	78.1984	22.2	[20 - 24.7%]	0.1972	0
GCF_009865085.1	Streptomyces sp. SID8370	strain=SID8370	78.1982	22.6	[20.3 - 25.1%]	0.1937	0
GCF_000686765.1	Streptomyces sp. UNC401CLCol	strain=UNC401CLCol	78.1981	22.1	[19.9 - 24.6%]	0.1981	0
GCF_008868685.1	Streptomyces triticiradicis	strain=NEAU-H2	78.1975	22.9	[20.6 - 25.3%]	0.1915	0
GCF_013376795.1	Streptomyces violascens	strain=YIM 100212	78.1974	22.7	[20.5 - 25.2%]	0.1925	0
GCF_008125015.1	Streptomyces coelicolor	strain=A3(2) R4-mCherry-16	78.1967	22.3	[20.1 - 24.8%]	0.1961	0
GCF_014280945.1	Streptomyces sp. SS06011	strain=SS06011	78.1926	22.4	[20.2 - 24.9%]	0.1952	0
GCF_003709145.1	Streptomyces sp. Tu 4128	strain=Tu 4128	78.1925	22.3	[20 - 24.7%]	0.197	0
GCF_014656135.1	Streptomyces thermodiastaticus	strain=JCM 4840	78.1896	22.5	[20.3 - 25%]	0.1944	0
GCF_003013745.1	Streptomyces sp. 111WW2	strain=111WW2	78.1894	22.4	[20.1 - 24.9%]	0.1955	0
GCF_002155905.1	Streptomyces tricolor	strain=NRRL B-16925	78.1893	22.7	[20.4 - 25.2%]	0.1929	0
GCF_900091315.1	Streptomyces sp. DI166	strain=DI166	78.1887	22.2	[19.9 - 24.6%]	0.1978	0
GCF_000981895.1	Streptomyces odonnellii	strain=NRRL B-24891	78.1871	23	[20.8 - 25.5%]	0.19	0
GCF_014651035.1	Streptomyces lomondensis	strain=JCM 4866	78.1854	22.5	[20.2 - 24.9%]	0.195	0
GCF_003236365.1	Streptomyces sp. NTH33	strain=NTH33	78.1845	22.8	[20.5 - 25.3%]	0.1918	0
GCF_013394065.1	Streptomyces rectiverticillatus	strain=B15-08	78.1837	22.7	[20.4 - 25.2%]	0.1927	0
GCF_009870065.1	Streptomyces sp. SID5785	strain=SID5785	78.1835	22.4	[20.1 - 24.8%]	0.1959	0
GCF_014650915.1	Streptomyces poonensis	strain=JCM 4815	78.1817	22.7	[20.4 - 25.1%]	0.193	0
GCF_009870095.1	Streptomyces sp. SID5606	strain=SID5606	78.1807	22.3	[20 - 24.7%]	0.1968	0
GCF_002237655.1	Streptomyces sp. XY006	strain=XY006	78.1794	22.6	[20.3 - 25%]	0.1942	0
GCF_001767375.1	Streptomyces olivaceus	strain=KLBMP 5084	78.1793	22.4	[20.1 - 24.9%]	0.1955	0
GCF_014646335.1	Streptomyces lasiicapitis	strain=CGMCC 4.7349	78.1789	22.3	[20 - 24.7%]	0.1965	0
GCF_001550225.1	Streptomyces scabiei	strain=95-18	78.1786	23.3	[21 - 25.8%]	0.1877	0
GCF_000719955.1	Streptomyces albidoflavus	strain=NRRL B-1271	78.1779	22.5	[20.3 - 25%]	0.1944	0
GCF_002155915.1	Streptomyces thermovulgaris	strain=NRRL B-12375	78.1768	22.7	[20.4 - 25.2%]	0.1928	0
GCF_001419705.1	Streptomyces prasinus	strain=NRRL B-2712	78.1761	23	[20.8 - 25.5%]	0.19	0
GCF_002154575.1	Streptomyces bobili	strain=NRRL B-1338	78.1752	22.5	[20.2 - 25%]	0.1945	0
GCF_001279455.1	Streptomyces sp. XY152	strain=XY152	78.1748	22.3	[20 - 24.8%]	0.1965	0
GCF_014207295.1	Streptomyces sp. AK010	strain=AK010	78.1741	22.5	[20.2 - 24.9%]	0.1952	0
GCF_009872535.1	Streptomyces sp. SID5789	strain=SID5789	78.1737	22.3	[20 - 24.7%]	0.1967	0
GCF_003550195.1	Streptomyces sp. 19	strain=19	78.1725	22.5	[20.2 - 25%]	0.1947	0
GCF_003112595.1	Streptomyces rubrogriseus	strain=NBRC 15455	78.1719	22.3	[20 - 24.7%]	0.1967	0
GCF_008931305.1	Streptomyces coelicolor A3(2)	strain=CFB_NBC_0001	78.1706	22.5	[20.2 - 25%]	0.1946	0
GCF_001184025.1	Streptomyces sp. NBRC 110468	strain=NBRC 110468	78.1695	22.4	[20.1 - 24.9%]	0.1955	0
GCF_003751175.1	Streptomyces sp. SAI-097	strain=E5N91 SAI-083	78.1692	22.5	[20.2 - 24.9%]	0.195	0
GCF_012044595.1	Streptomyces antibioticus	strain=DSM 41481	78.1689	22.5	[20.2 - 24.9%]	0.1949	0
GCF_013421635.1	Streptomyces sp. UH6	strain=UH6	78.1687	23.4	[21.1 - 25.9%]	0.1868	0
GCF_001577385.1	Streptomyces albidoflavus	strain=SM254	78.1685	22.7	[20.4 - 25.2%]	0.1928	0
GCF_014649295.1	Streptomyces libani subsp. rufus	strain=JCM 4325	78.1678	22.3	[20 - 24.8%]	0.1965	0
GCF_014649235.1	Streptomyces spectabilis	strain=JCM 4308	78.1662	22.4	[20.1 - 24.8%]	0.1958	0
GCF_008704445.1	Streptomyces prasinus	strain=ATCC 13879	78.1654	22.8	[20.6 - 25.3%]	0.1917	0
GCF_001723075.1	Streptomyces niveus	strain=NRRL 2449	78.1651	22.5	[20.2 - 24.9%]	0.1952	0
GCF_014650655.1	Streptomyces anandii JCM 4720	strain=JCM 4720	78.1641	22.3	[20 - 24.8%]	0.1965	0
GCF_004795155.1	Streptomyces sp. LRa12	strain=LRa12	78.164	22.4	[20.1 - 24.8%]	0.1959	0
GCF_002078235.1	Streptomyces viridosporus	strain=NRRL 2414	78.1628	22.5	[20.2 - 24.9%]	0.1948	0
GCF_000718375.1	Streptomyces sp. NRRL F-2305	strain=NRRL F-2305	78.1626	22.4	[20.1 - 24.8%]	0.196	0
GCF_014649895.1	Streptomyces rubiginosus	strain=JCM 4416	78.1625	22.1	[19.9 - 24.6%]	0.1981	0
GCF_002939475.1	Streptomyces cinnamoneus	strain=DSM 41675	78.162	22.4	[20.2 - 24.9%]	0.1953	0
GCF_002556545.1	Streptomyces formicae	strain=KY5	78.1603	22.5	[20.2 - 24.9%]	0.1951	0
GCF_000719895.1	Streptomyces sp. NRRL F-2799	strain=NRRL F-2799	78.1599	22.1	[19.8 - 24.5%]	0.1987	0
GCF_000225525.1	Streptomyces zinciresistens K42	strain=K42	78.1589	22.6	[20.3 - 25%]	0.1941	0
GCF_000721955.1	Streptomyces sp. NRRL S-481	strain=NRRL S-481	78.1576	22.9	[20.6 - 25.3%]	0.1916	0
GCF_012922115.1	Streptomyces sp. RLA2-12	strain=RLA2-12	78.1572	22.8	[20.5 - 25.2%]	0.1925	0
GCF_000414115.1	Streptomyces aurantiacus JA 4570	strain=JA 4570	78.157	22.6	[20.3 - 25.1%]	0.1937	0
GCF_000497425.1	Streptomyces niveus NCIMB 11891	strain=NCIMB 11891	78.1564	22.1	[19.9 - 24.6%]	0.1979	0
GCF_001417675.1	Streptomyces sp. NBRC 110030	strain=NBRC 110030	78.1555	22.4	[20.1 - 24.8%]	0.1959	0
GCF_004368985.1	Streptomyces coelicolor	strain=O-10.1	78.1555	22.3	[20.1 - 24.8%]	0.1962	0
GCF_003675325.1	Streptomyces sp. Z022	strain=Z022	78.1549	22.5	[20.2 - 25%]	0.1946	0
GCF_004196145.1	Streptomyces albidoflavus	strain=FXJ8.031	78.1542	22.5	[20.2 - 25%]	0.1946	0
GCF_006715605.1	Streptomyces sp. SLBN-109	strain=193411	78.1537	22.6	[20.3 - 25.1%]	0.1937	0
GCF_000972395.1	Streptomyces sp. WM6391	strain=WM6391	78.1533	22.4	[20.1 - 24.8%]	0.1959	0
GCF_014655475.1	Streptomyces viridodiastaticus	strain=JCM 4536	78.153	22.2	[19.9 - 24.6%]	0.1976	0
GCF_009862445.1	Streptomyces sp. SID7813	strain=SID7813	78.1527	22.5	[20.2 - 25%]	0.1946	0
GCF_004196155.1	Streptomyces albidoflavus	strain=CGMCC 4.1615	78.1522	22.5	[20.2 - 25%]	0.1946	0
GCF_009377175.1	Streptomyces adustus	strain=NBRC 109810	78.1521	22.6	[20.4 - 25.1%]	0.1934	0
GCF_001653115.1	Streptomyces sp. F-3		78.1513	22.5	[20.2 - 24.9%]	0.1949	0
GCF_003947455.1	Streptomyces sp. WAC 04229	strain=WAC 04229	78.1506	22.1	[19.8 - 24.6%]	0.1983	0
GCF_000829695.1	Streptomyces sp. NBRC 110035	strain=NBRC 110035	78.1501	22.7	[20.4 - 25.1%]	0.1932	0
GCF_000725125.1	Streptomyces toyocaensis	strain=NRRL 15009	78.1493	22.2	[19.9 - 24.7%]	0.1973	0
GCF_001970135.1	Streptomyces sp. M1013	strain=M1013	78.1486	22.4	[20.1 - 24.9%]	0.1955	0
GCF_008124915.1	Streptomyces coelicolor A3(2)	strain=ICSSB 1010	78.1486	22.3	[20.1 - 24.8%]	0.1961	0
GCF_009865205.1	Streptomyces sp. SID2999	strain=SID2999	78.1486	22.3	[20 - 24.7%]	0.1969	0
GCF_000373225.1	Streptomyces sp. LaPpAH-202	strain=LaPpAH-202	78.1485	22.5	[20.2 - 24.9%]	0.1952	0
GCF_009865125.1	Streptomyces sp. SID8371	strain=SID8371	78.1484	22.5	[20.2 - 24.9%]	0.1952	0
GCF_000156475.1	Streptomyces albidoflavus	strain=J1074	78.1469	22.9	[20.6 - 25.3%]	0.1915	0
GCF_000721455.1	Streptomyces sp. NRRL F-6628	strain=NRRL F-6628	78.1465	22.6	[20.3 - 25%]	0.1942	0
GCF_001514125.1	Streptomyces longwoodensis	strain=DSM 41677	78.1458	22.5	[20.3 - 25%]	0.1945	0
GCF_014203545.1	Streptomyces netropsis	strain=CECT 3265	78.1456	22.7	[20.4 - 25.1%]	0.1933	0
GCF_007113425.2	Streptomyces sp. RLB3-17	strain=RLB3-17	78.1443	22.7	[20.4 - 25.2%]	0.1929	0
GCF_009829585.1	Streptomyces tendae	strain=UTMC 3329	78.1439	22.3	[20.1 - 24.8%]	0.1961	0
GCF_003671685.1	Streptomyces sp. E5N298	strain=E5N298	78.1433	22.7	[20.4 - 25.2%]	0.1927	0
GCF_009865175.1	Streptomyces sp. SID337	strain=SID337	78.1422	22.3	[20 - 24.7%]	0.1969	0
GCF_001514265.1	Streptomyces resistomycificus	strain=DSM 40133	78.1421	22.3	[20 - 24.7%]	0.197	0
GCF_001513975.1	Streptomyces curacoi	strain=DSM 40107	78.1415	22.3	[20 - 24.7%]	0.1966	0
GCF_013046785.1	Streptomyces sp. jing01	strain=jing01	78.14	22.4	[20.2 - 24.9%]	0.1952	0
GCF_001906585.1	Streptomyces kebangsaanensis	strain=SUK12	78.1399	22.6	[20.3 - 25%]	0.1939	0
GCF_001572115.1	Streptomyces scabiei	strain=84-232	78.1397	23.2	[20.9 - 25.7%]	0.1886	0
GCF_900171555.1	Streptomyces albidoflavus	strain=R-53649	78.1385	22.8	[20.5 - 25.2%]	0.1925	0
GCF_007176755.1	Streptomyces sp. 1-11	strain=1-11	78.1372	22.3	[20.1 - 24.8%]	0.1964	0
GCF_014203505.1	Streptomyces eurocidicus	strain=CECT 3259	78.1371	22.9	[20.6 - 25.4%]	0.1909	0
GCF_004078575.1	Streptomyces albidoflavus	strain=BSII#1	78.1368	22.9	[20.6 - 25.3%]	0.1914	0
GCF_004803895.1	Streptomyces hawaiiensis	strain=ATCC 12236	78.1367	22.4	[20.2 - 24.9%]	0.1954	0
GCF_900215615.1	Streptomyces sp. Ag82_G6-1	strain=Ag82_G6-1	78.1367	22.6	[20.3 - 25%]	0.1941	0
GCF_014649995.1	Streptomyces griseoflavus	strain=JCM 4479	78.1361	22.3	[20 - 24.7%]	0.1968	0
GCF_014650795.1	Streptomyces coelescens	strain=JCM 4739	78.1357	22.3	[20.1 - 24.8%]	0.1962	0
GCF_011007525.1	Streptomyces coelicoflavus	strain=F13	78.1356	22.4	[20.2 - 24.9%]	0.1952	0
GCF_001270025.1	Streptomyces azureus	strain=ATCC 14921	78.1352	22.5	[20.2 - 24.9%]	0.1949	0
GCF_014649815.1	Streptomyces mutabilis	strain=JCM 4400	78.135	22.3	[20 - 24.7%]	0.1967	0
GCF_010993835.1	Streptomyces sp. OM5714	strain=OM5714	78.1349	22.5	[20.2 - 25%]	0.1947	0
GCF_002188355.1	Streptomyces sp. CS227	strain=CS227	78.1348	22.5	[20.2 - 25%]	0.1946	0
GCF_001550235.1	Streptomyces scabiei	strain=96-08	78.1338	23.3	[21 - 25.7%]	0.1879	0
GCF_002803065.1	Streptomyces sp. CB01635	strain=CB01635	78.1338	22.1	[19.8 - 24.6%]	0.1983	0
GCF_014649355.1	Streptomyces althioticus	strain=JCM 4344	78.1338	22.2	[19.9 - 24.6%]	0.1979	0
GCF_014649835.1	Streptomyces pilosus	strain=JCM 4403	78.1334	22.4	[20.1 - 24.8%]	0.1961	0
GCF_004563805.1	Streptomyces sp. 4R-3d	strain=4R-3d	78.1331	22.1	[19.8 - 24.6%]	0.1983	0
GCF_000719785.1	Streptomyces sp. NRRL S-1314	strain=NRRL S-1314	78.1329	22.2	[19.9 - 24.6%]	0.1977	0
GCF_002317025.1	Streptomyces albidoflavus	strain=138	78.1323	23	[20.7 - 25.4%]	0.1904	0
GCF_003428925.1	Streptomyces koyangensis	strain=VK-A60T	78.132	22.7	[20.5 - 25.2%]	0.1925	0
GCF_014656255.1	Streptomyces achromogenes subsp. rubradiris	strain=JCM 4955	78.1311	22.4	[20.1 - 24.8%]	0.196	0
GCF_014203495.1	Streptomyces albaduncus	strain=CECT 3226	78.1309	22.3	[20 - 24.7%]	0.1967	0
GCF_002803075.1	Streptomyces sp. CB01373	strain=CB01373	78.1303	22.5	[20.2 - 24.9%]	0.1951	0
GCF_000764715.1	Streptomyces avermitilis MA-4680 = NBRC 14893	strain=NBRC 14893	78.1291	22.7	[20.5 - 25.2%]	0.1927	0
GCF_014651155.1	Streptomyces anthocyanicus	strain=JCM 5058	78.1288	22.3	[20 - 24.8%]	0.1965	0
GCF_009862865.1	Streptomyces sp. SID5469	strain=SID5469	78.1282	22.8	[20.5 - 25.2%]	0.1925	0
GCF_002317035.1	Streptomyces albidoflavus	strain=143	78.1281	22.9	[20.6 - 25.4%]	0.1909	0
GCF_004195955.1	Streptomyces albidoflavus	strain=CR25	78.1279	22.5	[20.2 - 25%]	0.1947	0
GCF_015244315.1	Streptomyces olivaceus	strain=SCSIO T05	78.1277	22.5	[20.2 - 25%]	0.1946	0
GCF_000720835.1	Streptomyces achromogenes subsp. achromogenes	strain=NRRL B-2120	78.1268	22.3	[20.1 - 24.8%]	0.1963	0
GCF_014650035.1	Streptomyces lucensis JCM 4490	strain=JCM 4490	78.1261	22.4	[20.1 - 24.8%]	0.1958	0
GCF_000720135.1	Streptomyces sp. NRRL S-1022	strain=NRRL S-1022	78.1211	22.4	[20.2 - 24.9%]	0.1954	0
GCF_014650615.1	Streptomyces albaduncus	strain=JCM 4715	78.1194	22.2	[20 - 24.7%]	0.1972	0
GCF_014654675.1	Streptomyces spiralis	strain=JCM 3302	78.1189	22.6	[20.3 - 25%]	0.1942	0
GCF_000721435.1	Streptomyces sp. NRRL F-5527	strain=NRRL F-5527	78.1187	22.2	[19.9 - 24.6%]	0.1976	0
GCF_007113405.2	Streptomyces sp. RLB1-8	strain=RLB1-8	78.1184	22.8	[20.5 - 25.2%]	0.1922	0
GCF_007896905.1	Streptomyces albidoflavus	strain=77	78.1184	22.8	[20.5 - 25.2%]	0.1923	0
GCF_003671755.1	Streptomyces sp. E5N91	strain=E5N91	78.1167	22.7	[20.4 - 25.1%]	0.1933	0
GCF_013913525.1	Streptomyces griseoaurantiacus	strain=MBK6	78.1167	22.7	[20.4 - 25.2%]	0.1927	0
GCF_004364835.1	Streptomyces sp. BK141	strain=BK141	78.1148	22.4	[20.1 - 24.8%]	0.1959	0
GCF_000721365.1	Streptomyces sp. NRRL F-5650	strain=NRRL F-5650	78.1146	22.5	[20.2 - 25%]	0.1946	0
GCF_000009765.2	Streptomyces avermitilis MA-4680 = NBRC 14893	strain=MA-4680	78.1139	22.8	[20.5 - 25.2%]	0.1925	0
GCF_013363465.1	Streptomyces odorifer	strain=KAI-180	78.1129	22.6	[20.3 - 25.1%]	0.1938	0
GCF_007896895.1	Streptomyces misionensis	strain=66	78.1128	22.8	[20.5 - 25.3%]	0.1919	0
GCF_003935055.1	Streptomyces alboflavus	strain=313	78.111	22.5	[20.3 - 25%]	0.1945	0
GCF_002154415.1	Streptomyces angustmyceticus	strain=NRRL B-2347	78.1104	22.8	[20.5 - 25.3%]	0.1918	0
GCF_004195735.1	Streptomyces albidoflavus	strain=DSM 40455	78.1093	22.5	[20.3 - 25%]	0.1943	0
GCF_009831155.1	Streptomyces sp. XHT-2	strain=XHT-2	78.1085	22.3	[20 - 24.7%]	0.1966	0
GCF_000342345.1	Streptomyces gancidicus BKS 13-15	strain=BKS 13-15	78.1082	22.1	[19.9 - 24.6%]	0.198	0
GCF_900105605.1	Streptomyces sp. 2231.1	strain=2231.1	78.107	22.5	[20.2 - 24.9%]	0.1951	0
GCF_000717845.1	Streptomyces violaceoruber	strain=NRRL S-12	78.1067	22.4	[20.1 - 24.9%]	0.1956	0
GCF_014650475.1	Streptomyces albogriseolus	strain=JCM 4616	78.1063	22.1	[19.8 - 24.6%]	0.1983	0
GCF_014649515.1	Streptomyces flavoviridis	strain=JCM 4372	78.1061	22.4	[20.1 - 24.9%]	0.1955	0
GCF_010523235.1	Streptomyces sp. 604F	strain=604F	78.1059	22.7	[20.4 - 25.1%]	0.1933	0
GCF_014649075.1	Streptomyces cacaoi subsp. asoensis	strain=JCM 4185	78.1058	22.4	[20.1 - 24.8%]	0.1958	0
GCF_001431765.1	Streptomyces sp. FR-008	strain=FR-008	78.1045	22.8	[20.5 - 25.2%]	0.1921	0
GCF_014650495.1	Streptomyces cinnamoneus	strain=JCM 4633	78.1044	22.6	[20.3 - 25%]	0.1941	0
GCF_000818175.1	Streptomyces sp. AcH 505	strain=AcH 505	78.1035	22.2	[20 - 24.7%]	0.1973	0
GCF_900215595.1	Streptomyces sp. 1222.2	strain=1222.2	78.1022	22.6	[20.4 - 25.1%]	0.1935	0
GCF_014656015.1	Streptomyces griseoaurantiacus	strain=JCM 4763	78.1008	22.6	[20.3 - 25%]	0.1939	0
GCF_003391135.1	Streptomyces olivoreticuli subsp. olivoreticuli	strain=ATCC 31159	78.0997	22.6	[20.4 - 25.1%]	0.1936	0
GCF_000404005.1	Streptomyces sp. FXJ7.023	strain=FXJ7.023	78.0984	22.3	[20 - 24.7%]	0.1968	0
GCF_007595705.1	Streptomyces sp. SAJ15	strain=SAJ15	78.0977	22.9	[20.7 - 25.4%]	0.1909	0
GCF_900236475.1	Streptomyces chartreusis NRRL 3882		78.0966	22.4	[20.2 - 24.9%]	0.1953	0
GCF_900236505.1	Streptomyces chartreusis NRRL 3882		78.0966	22.4	[20.2 - 24.9%]	0.1953	0
GCF_000720215.1	Streptomyces sp. NRRL S-475	strain=NRRL S-475	78.0944	22.5	[20.2 - 24.9%]	0.1952	0
GCF_000719435.1	Streptomyces albidoflavus	strain=NRRL F-5618	78.0943	22.5	[20.3 - 25%]	0.1944	0
GCF_002017835.1	Streptomyces avermitilis	strain=MJM 7007	78.0943	22.8	[20.5 - 25.3%]	0.1919	0
GCF_010669165.1	Streptomyces aureoverticillatus	strain=HN6	78.0935	22.5	[20.3 - 25%]	0.1944	0
GCF_010548525.1	Streptomyces sp. SID14478	strain=SID14478	78.0929	22.3	[20.1 - 24.8%]	0.1962	0
GCF_012034295.1	Streptomyces sp. C1-2	strain=C1-2	78.0929	22.8	[20.5 - 25.2%]	0.1925	0
GCF_001550215.1	Streptomyces scabiei	strain=85-08	78.0926	23.2	[20.9 - 25.7%]	0.1886	0
GCF_008704495.1	Streptomyces kanamyceticus	strain=ATCC 12853	78.0923	22.4	[20.2 - 24.9%]	0.1954	0
GCF_011765715.1	Streptomyces sp. 2BBP-J2	strain=2BBP-J2	78.0923	22	[19.8 - 24.5%]	0.1992	0
GCF_014656175.1	Streptomyces werraensis	strain=JCM 4860	78.0923	22.2	[19.9 - 24.6%]	0.1978	0
GCF_004196055.1	Streptomyces albidoflavus	strain=CR16	78.0917	22.5	[20.3 - 25%]	0.1945	0
GCF_004196125.1	Streptomyces albidoflavus	strain=CR13	78.0916	22.4	[20.2 - 24.9%]	0.1953	0
GCF_000720475.1	Streptomyces aureocirculatus	strain=NRRL ISP-5386	78.0913	22.8	[20.5 - 25.3%]	0.1919	0
GCF_009755605.1	Streptomyces sp. p1417	strain=p1417	78.0909	22.7	[20.4 - 25.2%]	0.1929	0
GCF_004195775.1	Streptomyces albidoflavus	strain=DSM 40233	78.0908	22.4	[20.2 - 24.9%]	0.1953	0
GCF_005405965.1	Streptomyces avermitilis	strain=NBRC 14893	78.0904	22.9	[20.6 - 25.3%]	0.1914	0
GCF_000720185.1	Streptomyces sp. NRRL S-340	strain=NRRL S-340	78.0903	22.7	[20.5 - 25.2%]	0.1926	0
GCF_009862985.1	Streptomyces sp. SID5464	strain=SID5464	78.0901	22.3	[20.1 - 24.8%]	0.1963	0
GCF_004195755.1	Streptomyces albidoflavus	strain=NBRC 13083	78.0891	22.6	[20.3 - 25.1%]	0.1936	0
GCF_002188365.1	Streptomyces sp. CS113	strain=CS113	78.0888	22.5	[20.2 - 24.9%]	0.1952	0
GCF_002920635.1	Streptomyces sp. Ru72	strain=Ru72	78.0884	22.3	[20.1 - 24.8%]	0.1961	0
GCF_900091785.1	Streptomyces sp. BvitLS-983	strain=BvitLS-983	78.0884	22.8	[20.5 - 25.2%]	0.1922	0
GCF_014647975.1	Streptomyces fumigatiscleroticus	strain=JCM 3101	78.0876	22.5	[20.2 - 25%]	0.1945	0
GCF_000719265.1	Streptomyces roseoverticillatus	strain=NRRL B-3500	78.0869	22.7	[20.4 - 25.2%]	0.1929	0
GCF_004196035.1	Streptomyces albidoflavus	strain=CR19	78.0868	22.5	[20.2 - 24.9%]	0.195	0
GCF_004125245.1	Streptomyces lydicus	strain=ATCC 25470	78.0862	22.5	[20.2 - 24.9%]	0.1949	0
GCF_000226455.1	Streptomyces chartreusis NRRL 12338	strain=NRRL 12338	78.0856	22.3	[20.1 - 24.8%]	0.1963	0
GCF_001469455.2	Streptomyces sp. AVP053U2	strain=AVP053U2	78.0827	22.7	[20.4 - 25.1%]	0.1933	0
GCF_000415505.1	Streptomyces afghaniensis 772	strain=772	78.0809	22.8	[20.5 - 25.3%]	0.1918	0
GCF_007679265.1	Streptomyces collinus	strain=DE0114	78.0808	22.3	[20 - 24.7%]	0.197	0
GCF_010548515.1	Streptomyces sp. SID14446	strain=SID14446	78.0801	22.6	[20.4 - 25.1%]	0.1934	0
GCF_014649175.1	Streptomyces matensis	strain=JCM 4277	78.08	22.2	[19.9 - 24.7%]	0.1974	0
GCF_014650335.1	Streptomyces hiroshimensis	strain=JCM 4586	78.0794	22.6	[20.3 - 25.1%]	0.1936	0
GCF_009865275.1	Streptomyces sp. SID4915	strain=SID4915	78.0791	22.8	[20.5 - 25.2%]	0.1921	0
GCF_014649435.1	Streptomyces chromofuscus	strain=JCM 4354	78.079	22.6	[20.3 - 25%]	0.1941	0
GCF_003387455.1	Streptomyces sp. 2221.1	strain=2221.1	78.0781	22.5	[20.2 - 25%]	0.1947	0
GCF_008042115.1	Streptomyces sp. me109	strain=me109	78.078	22.9	[20.7 - 25.4%]	0.1908	0
GCF_002027195.1	Streptomyces sp. GKU 895	strain=GKU 895	78.0777	22.3	[20.1 - 24.8%]	0.1961	0
GCF_000299175.2	Streptomyces sp. SM8	strain=SM8	78.0776	22.8	[20.5 - 25.2%]	0.1924	0
GCF_009834105.1	Streptomyces sp. GF20	strain=GF20	78.0776	22.7	[20.4 - 25.1%]	0.1932	0
GCF_007113485.2	Streptomyces sp. S1D4-23	strain=S1D4-23	78.0771	22.7	[20.5 - 25.2%]	0.1926	0
GCF_000955965.1	Streptomyces variegatus	strain=NRRL B-16380	78.0762	22.3	[20 - 24.7%]	0.1968	0
GCF_001672315.1	Streptomyces sp. H-KF8	strain=H-KF8	78.076	22.9	[20.6 - 25.3%]	0.1916	0
GCF_009865585.1	Streptomyces sp. SID161	strain=SID161	78.0757	22.8	[20.5 - 25.3%]	0.192	0
GCF_014649455.1	Streptomyces coeruleorubidus	strain=JCM 4359	78.0755	22.4	[20.1 - 24.8%]	0.196	0
GCF_014655595.1	Streptomyces griseocarneus	strain=JCM 4580	78.0754	22.5	[20.3 - 25%]	0.1944	0
GCF_001418465.1	Streptomyces kanamyceticus	strain=NRRL B-2535	78.0752	22.6	[20.3 - 25%]	0.1941	0
GCF_009846825.1	Streptomyces sp. FR-008	strain=FR-008	78.0752	22.7	[20.4 - 25.1%]	0.1934	0
GCF_014648635.1	Streptomyces cinerochromogenes	strain=JCM 3385	78.0749	22.3	[20 - 24.8%]	0.1965	0
GCF_000495635.1	Streptomyces sp. GBA 94-10	strain=GBA 94-10	78.0732	22.7	[20.4 - 25.1%]	0.1933	0
GCF_001723055.1	Streptomyces niveus	strain=NRRL 2466	78.0726	22.3	[20 - 24.8%]	0.1965	0
GCF_001905725.1	Streptomyces sp. CB02400	strain=CB02400	78.0723	22.4	[20.1 - 24.8%]	0.1957	0
GCF_004196095.1	Streptomyces albidoflavus	strain=CR15	78.0714	22.4	[20.2 - 24.9%]	0.1953	0
GCF_001735805.1	Streptomyces fodineus	strain=TW1S1	78.0713	22.3	[20 - 24.7%]	0.1967	0
GCF_007677905.1	Streptomyces incarnatus	strain=DE0205	78.0701	22.3	[20 - 24.7%]	0.1969	0
GCF_014646115.1	Streptomyces camponoticapitis	strain=CGMCC 4.7275	78.07	22.2	[19.9 - 24.6%]	0.1978	0
GCF_001550315.1	Streptomyces sp. 96-12	strain=96-12	78.0697	23.2	[20.9 - 25.7%]	0.1883	0
GCF_004010035.1	Streptomyces sp. S10(2018)	strain=S10(2018)	78.0691	22.8	[20.5 - 25.3%]	0.1918	0
GCF_001484565.1	Streptomyces sp. CdTB01	strain=CdTB01	78.0681	22.4	[20.2 - 24.9%]	0.1954	0
GCF_012273515.1	Streptomyces sp. RPA4-2	strain=RPA4-2	78.0674	22.8	[20.5 - 25.2%]	0.1922	0
GCF_001044185.1	Streptomyces sp. HNS054	strain=HNS054	78.0673	22.1	[19.8 - 24.6%]	0.1983	0
GCF_009865385.1	Streptomyces sp. SID486	strain=SID486	78.0671	22.6	[20.3 - 25%]	0.1939	0
GCF_007679425.1	Streptomyces incarnatus	strain=DE0106	78.0663	22.3	[20 - 24.7%]	0.197	0
GCF_007113545.2	Streptomyces sp. RLB3-6	strain=RLB3-6	78.0661	22.8	[20.5 - 25.2%]	0.1923	0
GCF_000725625.1	Streptomyces sp. NRRL F-6676	strain=NRRL F-6676	78.0643	22.6	[20.4 - 25.1%]	0.1935	0
GCF_000805335.1	Streptomyces sp. CT34	strain=CT34	78.0641	22.7	[20.5 - 25.2%]	0.1926	0
GCF_004195745.1	Streptomyces albidoflavus	strain=NBRC 100770	78.064	22.6	[20.3 - 25%]	0.194	0
GCF_006540305.1	Streptomyces sp. 6-11-2	strain=6-11-2	78.0636	22.5	[20.2 - 25%]	0.1945	0
GCF_003041235.1	Streptomyces sp. A244	strain=A244	78.0628	22.3	[20 - 24.7%]	0.1968	0
GCF_011820545.1	Streptomyces sp. DSM 40868	strain=DSM 40868	78.0612	22.5	[20.2 - 24.9%]	0.1947	0
GCF_004196045.1	Streptomyces albidoflavus	strain=CR46	78.061	22.5	[20.3 - 25%]	0.1945	0
GCF_002335465.1	Streptomyces olivochromogenes	strain=NBRC 3561	78.0607	22.6	[20.4 - 25.1%]	0.1935	0
GCF_011170145.1	Streptomyces gougerotii	strain=NBRC 13043	78.0591	22.6	[20.3 - 25.1%]	0.1938	0
GCF_004195965.1	Streptomyces albidoflavus	strain=Ma1	78.0588	22.5	[20.3 - 25%]	0.1943	0
GCF_005405985.1	Streptomyces avermitilis	strain=ATCC 31267	78.0587	22.9	[20.6 - 25.4%]	0.1911	0
GCF_002920575.1	Streptomyces sp. Ru73	strain=Ru73	78.0585	22.7	[20.4 - 25.1%]	0.1931	0
GCF_004295505.1	Streptomyces tsukubensis	strain=VKM Ac-2618D	78.058	22.6	[20.3 - 25.1%]	0.1938	0
GCF_000444875.1	Streptomyces collinus Tu 365	strain=Tu 365	78.0569	22.4	[20.1 - 24.8%]	0.1958	0
GCF_000717635.1	Streptomyces sp. NRRL B-12105	strain=NRRL B-12105	78.0555	22.6	[20.4 - 25.1%]	0.1934	0
GCF_003663895.1	Streptomyces sp. 74	strain=74	78.0551	22.6	[20.3 - 25.1%]	0.1937	0
GCF_004195935.1	Streptomyces albidoflavus	strain=CR33	78.0549	22.5	[20.2 - 25%]	0.1947	0
GCF_007113585.2	Streptomyces sp. S1D4-20	strain=S1D4-20	78.0545	22.8	[20.5 - 25.2%]	0.1923	0
GCF_014650955.1	Streptomyces tauricus	strain=JCM 4837	78.0542	22.6	[20.4 - 25.1%]	0.1934	0
GCF_001550295.1	Streptomyces scabiei	strain=96-15	78.0541	23.2	[20.9 - 25.7%]	0.1882	0
GCF_000720755.1	Streptomyces flaveus	strain=NRRL WC-3505	78.054	22.5	[20.2 - 24.9%]	0.1951	0
GCF_004195895.1	Streptomyces albidoflavus	strain=Ma24	78.0537	22.5	[20.3 - 25%]	0.1945	0
GCF_000373625.1	Streptomyces sp. LaPpAH-108	strain=LaPpAH-108	78.0527	22.2	[20 - 24.7%]	0.1971	0
GCF_000974985.2	Streptomyces mangrovisoli	strain=MUSC 149	78.0527	22.7	[20.4 - 25.1%]	0.1932	0
GCF_014650015.1	Streptomyces griseoloalbus	strain=JCM 4480	78.0527	22.3	[20 - 24.7%]	0.1967	0
GCF_009865265.1	Streptomyces sp. SID4917	strain=SID4917	78.0524	23.2	[20.9 - 25.6%]	0.1889	0
GCF_014650995.1	Streptomyces viridiviolaceus	strain=JCM 4855	78.0511	22.4	[20.1 - 24.8%]	0.196	0
GCF_001514135.1	Streptomyces avermitilis	strain=DSM 46492	78.0508	22.6	[20.3 - 25%]	0.1939	0
GCF_000719495.1	Streptomyces albidoflavus	strain=NRRL F-5621	78.0502	22.6	[20.3 - 25%]	0.1939	0
GCF_900091995.1	Streptomyces sp. MnatMP-M17	strain=MnatMP-M17	78.0492	23.1	[20.8 - 25.5%]	0.1896	0
GCF_009873275.1	Streptomyces sp. SID5914	strain=SID5914	78.0483	22.7	[20.4 - 25.2%]	0.1928	0
GCF_002300485.1	Streptomyces sp. Ag82_O1-15	strain=Ag82_O1-15	78.0476	22.5	[20.3 - 25%]	0.1943	0
GCF_001550245.1	Streptomyces scabiei	strain=84-34	78.0474	23.3	[21 - 25.7%]	0.1881	0
GCF_000968255.1	Streptomyces avermitilis MA-4680 = NBRC 14893	strain=MA-4680	78.0472	22.7	[20.4 - 25.2%]	0.1928	0
GCF_014648775.1	Streptomyces abikoensis	strain=JCM 4002	78.047	22.5	[20.2 - 24.9%]	0.195	0
GCF_002891435.1	Streptomyces sp. 13K301	strain=13K301	78.0455	22.4	[20.1 - 24.8%]	0.1957	0
GCF_009862265.1	Streptomyces sp. SID8352	strain=SID8352	78.0448	22.5	[20.2 - 25%]	0.1946	0
GCF_002844215.1	Streptomyces sp. EAG2	strain=EAG2	78.0447	22.6	[20.3 - 25%]	0.194	0
GCF_000373685.1	Streptomyces sp. PsTaAH-124	strain=PsTaAH-124	78.0438	22.3	[20 - 24.7%]	0.1968	0
GCF_008312835.1	Streptomyces marokkonensis	strain=OANH409	78.0436	22.2	[20 - 24.7%]	0.1972	0
GCF_900110755.1	Streptomyces sp. yr375	strain=YR375	78.0434	22.3	[20.1 - 24.8%]	0.1962	0
GCF_001514115.1	Streptomyces olivochromogenes	strain=DSM 40451	78.0426	22.7	[20.4 - 25.1%]	0.1934	0
GCF_013433285.1	Streptomyces sp. TRM44567	strain=TRM44567	78.0421	22.5	[20.3 - 25%]	0.1945	0
GCF_000725635.1	Streptomyces sp. NRRL B-3253	strain=NRRL B-3253	78.0417	22.6	[20.3 - 25%]	0.1941	0
GCF_014650435.1	Streptomyces tendae	strain=JCM 4610	78.0406	22.3	[20 - 24.7%]	0.1966	0
GCF_000725795.1	Streptomyces seoulensis	strain=NRRL B-24310	78.0392	22	[19.7 - 24.4%]	0.1993	0
GCF_007113565.2	Streptomyces sp. S1A1-7	strain=S1A1-7	78.0392	22.8	[20.5 - 25.2%]	0.1925	0
GCF_001279005.1	Streptomyces caelestis	strain=NRRL B-24567	78.0384	22.4	[20.1 - 24.8%]	0.1959	0
GCF_001509565.1	Streptomyces albidoflavus	strain=NRRL WC-3066	78.0376	22.6	[20.3 - 25.1%]	0.1938	0
GCF_010548675.1	Streptomyces bauhiniae	strain=SID7754	78.0364	22.2	[20 - 24.7%]	0.197	0
GCF_014649575.1	Streptomyces griseoincarnatus	strain=JCM 4381	78.0364	22.2	[20 - 24.7%]	0.1973	0
GCF_000721235.1	Streptomyces olivaceus	strain=NRRL B-3009	78.0361	22.3	[20.1 - 24.8%]	0.1963	0
GCF_004196225.1	Streptomyces sp. SCA2-2	strain=SCA2-2	78.0355	22.6	[20.3 - 25%]	0.194	0
GCF_000725785.1	Streptomyces flavovariabilis	strain=NRRL B-16367	78.0346	22.3	[20 - 24.7%]	0.1968	0
GCF_014701115.1	Streptomyces glomeroaurantiacus	strain=JCM 4677	78.0343	22.9	[20.6 - 25.3%]	0.1915	0
GCF_002286695.1	Streptomyces albireticuli	strain=NRRL B-1670	78.0336	22.9	[20.7 - 25.4%]	0.1909	0
GCF_000424945.1	Streptomyces sp. 142MFCol3.1	strain=142MFCol3.1	78.0335	22.4	[20.1 - 24.8%]	0.1959	0
GCF_002148965.1	Streptomyces swartbergensis	strain=HMC13	78.0316	22.6	[20.3 - 25%]	0.1942	0
GCF_001974775.1	Streptomyces sp. WAC00263	strain=WAC00263	78.0307	22.7	[20.5 - 25.2%]	0.1925	0
GCF_001865315.1	Streptomyces sampsonii	strain=KJ40	78.0304	22.7	[20.5 - 25.2%]	0.1927	0
GCF_000827005.1	Streptomyces albus	strain=DSM 41398	78.0302	22.9	[20.6 - 25.4%]	0.1912	0
GCF_000717375.1	Streptomyces albidoflavus	strain=NRRL B-2307	78.0301	22.6	[20.3 - 25%]	0.194	0
GCF_006715785.1	Streptomyces puniciscabiei	strain=DSM 41929	78.0287	22.5	[20.2 - 24.9%]	0.1948	0
GCF_001280065.1	Streptomyces sp. NRRL B-1140	strain=NRRL B-1140	78.0286	22.5	[20.2 - 24.9%]	0.1949	0
GCF_003112535.1	Streptomyces rishiriensis	strain=NBRC 13407	78.0277	22.4	[20.2 - 24.9%]	0.1953	0
GCF_000204605.1	Streptomyces griseoaurantiacus M045	strain=M045	78.0268	22.6	[20.3 - 25%]	0.1941	0
GCF_001514285.1	Streptomyces sp. DSM 15324	strain=DSM 15324	78.0268	22.7	[20.4 - 25.1%]	0.1932	0
GCF_000719745.1	Streptomyces sp. NRRL F-6677	strain=NRRL F-6677	78.0265	22.6	[20.4 - 25.1%]	0.1935	0
GCF_013363555.1	Streptomyces fungicidicus	strain=CAI-93	78.0261	22.5	[20.2 - 24.9%]	0.195	0
GCF_004124335.1	Streptomyces sp. N1	strain=N1	78.0253	22.7	[20.4 - 25.1%]	0.1932	0
GCF_900102095.1	Streptomyces jietaisiensis	strain=CGMCC 4.1859	78.0253	22.5	[20.2 - 24.9%]	0.1948	0
GCF_003688775.1	Streptomyces sp. LaPpAH-201	strain=LaPpAH-201	78.0238	22.4	[20.1 - 24.8%]	0.1958	0
GCF_013363585.1	Streptomyces sp. CAI-78	strain=CAI-78	78.0232	22.7	[20.4 - 25.1%]	0.193	0
GCF_007113465.1	Streptomyces sp. S1A1-3	strain=S1A1-3	78.0228	22.8	[20.5 - 25.2%]	0.1924	0
GCF_014203475.1	Streptomyces spectabilis	strain=CECT 3146	78.0228	22.4	[20.2 - 24.9%]	0.1953	0
GCF_004217355.1	Streptomyces sp. BK022	strain=BK022	78.0225	21.9	[19.7 - 24.4%]	0.1999	0
GCF_014650275.1	Streptomyces mirabilis	strain=JCM 4551	78.0216	22.5	[20.2 - 24.9%]	0.1949	0
GCF_001482415.1	Streptomyces silvensis	strain=ATCC 53525	78.0208	22.7	[20.4 - 25.2%]	0.1929	0
GCF_014649195.1	Streptomyces bellus	strain=JCM 4292	78.0206	22.4	[20.2 - 24.9%]	0.1953	0
GCF_001865795.1	Streptomyces albidoflavus	strain=OsiLf-2	78.0187	22.7	[20.4 - 25.1%]	0.1933	0
GCF_000377545.1	Streptomyces sp. CNY228	strain=CNY228	78.0186	22.4	[20.2 - 24.9%]	0.1953	0
GCF_001753425.1	Streptomyces albus	strain=BK3-25	78.0185	22.9	[20.6 - 25.4%]	0.1912	0
GCF_000718775.1	Streptomyces sp. NRRL S-31	strain=NRRL S-31	78.0177	22.4	[20.1 - 24.8%]	0.196	0
GCF_900104815.1	Streptomyces misionensis	strain=DSM 40306	78.0176	22.4	[20.2 - 24.9%]	0.1953	0
GCF_001279545.1	Streptomyces sp. NRRL B-3648	strain=NRRL B-3648	78.0154	22.3	[20.1 - 24.8%]	0.1963	0
GCF_008705135.1	Streptomyces coeruleorubidus	strain=ATCC 13740	78.0154	22.5	[20.2 - 25%]	0.1946	0
GCF_002727115.1	Streptomyces cinnamoneus	strain=ATCC 21532	78.015	22.8	[20.5 - 25.2%]	0.1924	0
GCF_001517125.1	Streptomyces canus	strain=C-509	78.0141	22.3	[20.1 - 24.8%]	0.1962	0
GCF_000297155.3	Streptomyces tsukubensis NRRL18488	strain=NRRL18488	78.0129	23.2	[20.9 - 25.7%]	0.1883	0
GCF_001636945.1	Streptomyces sp. FXJ1.172	strain=FXJ1.172	78.0125	22.2	[19.9 - 24.6%]	0.1976	0
GCF_014852675.1	Streptomyces sp. ID01-12c	strain=ID01-12c	78.0112	22.6	[20.3 - 25%]	0.194	0
GCF_002846455.1	Streptomyces sp. 5112.2	strain=5112.2	78.0085	22.4	[20.1 - 24.9%]	0.1955	0
GCF_014281095.1	Streptomyces sp. CBG9	strain=CBG9	78.0083	22.8	[20.5 - 25.2%]	0.1922	0
GCF_004195765.1	Streptomyces albidoflavus	strain=CGMCC 4.1677	78.0079	22.5	[20.2 - 24.9%]	0.1949	0
GCF_000611795.1	Streptomyces sp. Tu 6176	strain=Tu 6176	78.0074	22.7	[20.4 - 25.2%]	0.1929	0
GCF_004784475.1	Streptomyces bauhiniae	strain=Bv016	78.0074	21.8	[19.5 - 24.2%]	0.2012	0
GCF_003626645.1	Streptomyces klenkii	strain=KCTC 29202	78.0057	22.6	[20.3 - 25.1%]	0.1938	0
GCF_012273655.1	Streptomyces sp. LD120	strain=LD120	78.0053	22.7	[20.4 - 25.2%]	0.1929	0
GCF_002920615.1	Streptomyces sp. Ru62	strain=Ru62	78.0041	22.4	[20.1 - 24.9%]	0.1956	0
GCF_003386845.1	Streptomyces sp. Ag82_O1-9	strain=Ag82_O1-9	78.0034	22.4	[20.1 - 24.8%]	0.1958	0
GCF_000245355.1	Streptomyces hygroscopicus subsp. jinggangensis 5008	strain=5008	78.0033	22.5	[20.2 - 24.9%]	0.1951	0
GCF_007113445.1	Streptomyces sp. RLB3-5	strain=RLB3-5	78.0021	22.7	[20.5 - 25.2%]	0.1925	0
GCF_014650055.1	Streptomyces malachitofuscus	strain=JCM 4493	78.0018	22.2	[20 - 24.7%]	0.1972	0
GCF_001418175.1	Streptomyces hirsutus	strain=NRRL B-3040	78.0014	22.7	[20.4 - 25.1%]	0.1931	0
GCF_006715825.1	Streptomyces sp. SLBN-192	strain=4-17	78.0014	22.5	[20.2 - 24.9%]	0.1948	0
GCF_000717875.1	Streptomyces sp. NRRL S-455	strain=NRRL S-455	78.0011	22.4	[20.2 - 24.9%]	0.1954	0
GCF_002910725.2	Streptomyces sp. SM17	strain=SM17	78.001	22.7	[20.5 - 25.2%]	0.1927	0
GCF_900105245.1	Streptomyces sp. 1222.5	strain=1222.5	78.001	22.4	[20.1 - 24.9%]	0.1955	0
GCF_003970715.1	Streptomyces luteoverticillatus	strain=CGMCC 15060	77.9994	22.8	[20.5 - 25.3%]	0.1919	0
GCF_004196135.1	Streptomyces albidoflavus	strain=D62	77.9994	22.6	[20.3 - 25%]	0.1941	0
GCF_007113665.2	Streptomyces sp. S1D4-14	strain=S1D4-14	77.9994	22.8	[20.5 - 25.2%]	0.1922	0
GCF_001866645.1	Streptomyces colonosanans	strain=MUSC 93	77.9993	22.4	[20.1 - 24.8%]	0.1957	0
GCF_000716615.1	Streptomyces sp. NRRL F-6674	strain=NRRL F-6674	77.9992	22.6	[20.4 - 25.1%]	0.1934	0
GCF_001426425.1	Streptomyces sp. Root1310	strain=Root1310	77.9991	22.4	[20.1 - 24.9%]	0.1955	0
GCF_009176265.1	Streptomyces angustmyceticus	strain=NBRC 3934	77.9989	22.5	[20.2 - 25%]	0.1947	0
GCF_003143935.1	Streptomyces sp. Act143	strain=Act143	77.9984	22.2	[20 - 24.7%]	0.1972	0
GCF_008016805.1	Streptomyces lavendulae	strain=YAKB-15	77.9981	22.3	[20 - 24.7%]	0.1965	0
GCF_007113525.2	Streptomyces sp. RLB1-9	strain=RLB1-9	77.9969	22.8	[20.5 - 25.2%]	0.1924	0
GCF_014649615.1	Streptomyces griseorubens	strain=JCM 4383	77.9968	22.2	[19.9 - 24.6%]	0.1979	0
GCF_006539505.1	Streptomyces spinoverrucosus	strain=NBRC 14228	77.9965	22.3	[20 - 24.7%]	0.1966	0
GCF_001282115.1	Streptomyces sp. NRRL B-24085	strain=NRRL B-24085	77.9959	22.5	[20.2 - 24.9%]	0.1951	0
GCF_004195995.1	Streptomyces albidoflavus	strain=CR47	77.9958	22.5	[20.3 - 25%]	0.1944	0
GCF_000720295.1	Streptomyces sp. NRRL WC-3725	strain=NRRL WC-3725	77.9955	22.5	[20.3 - 25%]	0.1943	0
GCF_000718785.1	Streptomyces sp. NRRL WC-3626	strain=NRRL WC-3626	77.9954	22.1	[19.8 - 24.5%]	0.1986	0
GCF_010548725.1	Streptomyces sp. SID8014	strain=SID8014	77.9953	22.6	[20.3 - 25.1%]	0.1937	0
GCF_900215305.1	Streptomyces sp. OK228	strain=OK228	77.9953	22.8	[20.5 - 25.2%]	0.1922	0
GCF_001905855.1	Streptomyces sp. CB01883	strain=CB01883	77.9937	22.4	[20.1 - 24.8%]	0.1958	0
GCF_014204745.1	Streptomyces collinus	strain=DSM 40129	77.9937	22.3	[20.1 - 24.8%]	0.1961	0
GCF_004000395.1	Streptomyces sp. B29(2018)	strain=B29(2018)	77.9936	22.6	[20.3 - 25.1%]	0.1938	0
GCF_014650255.1	Streptomyces violarus	strain=JCM 4534	77.9933	22.2	[19.9 - 24.7%]	0.1974	0
GCF_014205055.1	Streptomyces luteogriseus	strain=DSM 40483	77.9921	22.5	[20.2 - 25%]	0.1945	0
GCF_000349325.1	Streptomyces davaonensis JCM 4913	strain=JCM 4913	77.9913	22.1	[19.9 - 24.6%]	0.198	0
GCF_001746365.1	Streptomyces sp. LUP30	strain=LUP30	77.99	22.5	[20.2 - 25%]	0.1946	0
GCF_000717745.1	Streptomyces violens	strain=NRRL ISP-5597	77.9898	22.6	[20.3 - 25.1%]	0.1938	0
GCF_004195855.1	Streptomyces albidoflavus	strain=FXJ.2339	77.9882	22.5	[20.3 - 25%]	0.1943	0
GCF_014203845.1	Streptomyces scabiei	strain=SAI-025	77.9877	22.7	[20.4 - 25.1%]	0.1932	0
GCF_003751985.1	Streptomyces sp. PanSC9	strain=PanSC9	77.9876	22.5	[20.2 - 24.9%]	0.1948	0
GCF_900129855.1	Streptomyces sp. 3214.6	strain=3214.6	77.9874	22.6	[20.3 - 25.1%]	0.1937	0
GCF_014647695.1	Streptomyces humiferus	strain=JCM 3037	77.9832	22.4	[20.1 - 24.9%]	0.1955	0
GCF_002150735.1	Streptomyces africanus	strain=NRRL B-24243	77.9824	22.6	[20.3 - 25%]	0.1941	0
GCF_013363485.1	Streptomyces sp. KAI-27	strain=KAI-27	77.9823	22.7	[20.4 - 25.1%]	0.1934	0
GCF_014651075.1	Streptomyces djakartensis	strain=JCM 4957	77.9809	22.5	[20.2 - 24.9%]	0.1948	0
GCF_004104505.1	Streptomyces sp. M2	strain=M2	77.9802	22.2	[20 - 24.7%]	0.1972	0
GCF_000158955.1	Streptomyces viridochromogenes DSM 40736	strain=DSM 40736	77.9798	22.4	[20.1 - 24.8%]	0.1961	0
GCF_014216335.1	Streptomyces rutgersensis	strain=NBH77	77.9797	22.7	[20.4 - 25.1%]	0.1932	0
GCF_001418415.1	Streptomyces hirsutus	strain=NRRL B-2713	77.979	22.8	[20.5 - 25.2%]	0.1925	0
GCF_002573955.1	Streptomyces sp. Ru87	strain=Ru87	77.9789	22.8	[20.5 - 25.3%]	0.1918	0
GCF_004196215.1	Streptomyces albidoflavus	strain=FXJ6.189	77.9786	22.5	[20.3 - 25%]	0.1944	0
GCF_000495755.1	Streptomyces sp. PVA_94-07	strain=PVA 94-07	77.977	22.7	[20.4 - 25.2%]	0.1928	0
GCF_013009255.1	Streptomyces sp. Z423-1	strain=Z423-1	77.977	22.6	[20.3 - 25%]	0.1939	0
GCF_000718625.1	Streptomyces lavenduligriseus	strain=NRRL ISP-5487	77.9764	22.4	[20.1 - 24.8%]	0.1957	0
GCF_003846265.1	Streptomyces sp. ADI96-15	strain=ADI96-15	77.9754	22.4	[20.1 - 24.9%]	0.1956	0
GCF_001704195.1	Streptomyces sampsonii	strain=KJ40	77.974	22.7	[20.5 - 25.2%]	0.1927	0
GCF_007113505.2	Streptomyces sp. S1A1-8	strain=S1A1-8	77.9721	22.8	[20.5 - 25.2%]	0.1924	0
GCF_003865155.1	Streptomyces rimosus subsp. paromomycinus	strain=NBRC 15454	77.9713	23	[20.7 - 25.5%]	0.1903	0
GCF_003932715.1	Streptomyces tsukubensis	strain=NRRL 18488	77.9693	22.7	[20.4 - 25.2%]	0.1929	0
GCF_003846285.1	Streptomyces sp. ADI98-12	strain=ADI98-12	77.9692	22.4	[20.1 - 24.8%]	0.1958	0
GCF_000719865.1	Streptomyces albus subsp. albus	strain=NRRL F-4971	77.9691	22.6	[20.3 - 25.1%]	0.1938	0
GCF_000717055.1	Streptomyces iakyrus	strain=NRRL ISP-5482	77.9672	22.3	[20 - 24.7%]	0.1969	0
GCF_001419685.1	Streptomyces puniciscabiei	strain=NRRL B-24456	77.9667	22.6	[20.3 - 25%]	0.1942	0
GCF_014280995.1	Streptomyces sp. CBG33	strain=CBG33	77.9663	22.7	[20.5 - 25.2%]	0.1927	0
GCF_000800535.1	Streptomyces sp. M10	strain=M10	77.9657	22.7	[20.4 - 25.1%]	0.1932	0
GCF_011170125.1	Streptomyces diastaticus subsp. diastaticus	strain=NBRC 13412	77.9645	22.6	[20.4 - 25.1%]	0.1935	0
GCF_014656035.1	Streptomyces griseoluteus	strain=JCM 4765	77.9636	21.9	[19.7 - 24.4%]	0.1998	0
GCF_001418165.1	Streptomyces prasinus	strain=NRRL B-12521	77.9634	23	[20.7 - 25.5%]	0.1902	0
GCF_014205255.1	Streptomyces caelestis	strain=DSM 40084	77.963	22.4	[20.1 - 24.9%]	0.1956	0
GCF_000797385.1	Streptomyces sp. CNQ431	strain=CNQ431	77.9626	22.5	[20.2 - 25%]	0.1945	0
GCF_003752045.1	Streptomyces ossamyceticus	strain=SAI-001	77.9623	22.8	[20.5 - 25.2%]	0.1924	0
GCF_004187715.1	Streptomyces sp. F001	strain=F001	77.9618	22.4	[20.1 - 24.8%]	0.1956	0
GCF_004328625.1	Streptomyces seoulensis	strain=KCTC 9819	77.9615	22.1	[19.9 - 24.6%]	0.1981	0
GCF_001611795.1	Streptomyces qaidamensis	strain=S10	77.9611	22.3	[20 - 24.7%]	0.1968	0
GCF_013010335.1	Streptomyces sp. N502	strain=N502	77.9601	22.4	[20.1 - 24.9%]	0.1955	0
GCF_003259585.1	Streptomyces sp. PsTaAH-130	strain=PsTaAH-130	77.96	22.2	[19.9 - 24.6%]	0.1977	0
GCF_009862035.1	Streptomyces sp. SID8366	strain=SID8366	77.96	22.2	[19.9 - 24.6%]	0.1977	0
GCF_000721105.1	Streptomyces cellulosae	strain=NRRL B-2687	77.9595	22.4	[20.1 - 24.9%]	0.1956	0
GCF_013085465.1	Streptomyces cacaoi subsp. asoensis	strain=H2S5	77.9595	22.4	[20.2 - 24.9%]	0.1952	0
GCF_001513985.1	Streptomyces griseorubiginosus	strain=DSM 40125	77.9582	22.5	[20.2 - 24.9%]	0.1951	0
GCF_004341025.1	Streptomyces sp. BK205	strain=BK205	77.9576	22.4	[20.2 - 24.9%]	0.1953	0
GCF_011170105.1	Streptomyces rutgersensis	strain=NBRC 12819	77.9562	22.6	[20.4 - 25.1%]	0.1934	0
GCF_004195945.1	Streptomyces albidoflavus	strain=CR10	77.9557	22.4	[20.2 - 24.9%]	0.1954	0
GCF_002754555.1	Streptomyces sp. 94	strain=94	77.9541	22.7	[20.4 - 25.1%]	0.193	0
GCF_003633975.1	Streptomyces sp. 42	strain=42	77.953	22.5	[20.3 - 25%]	0.1943	0
GCF_015321285.1	Streptomyces albidoflavus	strain=ANT_B131	77.9527	22.4	[20.1 - 24.9%]	0.1955	0
GCF_014649115.1	Streptomyces eurythermus	strain=JCM 4206	77.9517	22.3	[20.1 - 24.8%]	0.1964	0
GCF_001418335.1	Streptomyces aurantiacus	strain=NRRL ISP-5412	77.9516	22.7	[20.5 - 25.2%]	0.1926	0
GCF_012273535.1	Streptomyces sp. RLB1-33	strain=RLB1-33	77.9501	22.5	[20.3 - 25%]	0.1945	0
GCF_003584815.1	Streptomyces scabiei	strain=ST129	77.9488	23	[20.7 - 25.5%]	0.1901	0
GCF_900206255.1	Streptomyces sp. TLI_55	strain=TLI_55	77.9481	22.3	[20 - 24.7%]	0.1965	0
GCF_004195845.1	Streptomyces albidoflavus	strain=CGMCC 4.1681	77.945	22.5	[20.2 - 24.9%]	0.1948	0
GCF_009834145.1	Streptomyces sp. HF10	strain=HF10	77.9442	22.4	[20.1 - 24.8%]	0.1957	0
GCF_009604455.1	Streptomyces sp. RB17	strain=RB17	77.9437	22.4	[20.1 - 24.9%]	0.1956	0
GCF_014648995.1	Streptomyces massasporeus	strain=JCM 4139	77.9417	22.4	[20.1 - 24.8%]	0.1957	0
GCF_900105755.1	Streptomyces sp. Ag109_O5-10	strain=Ag109_O5-10	77.9413	22.5	[20.2 - 24.9%]	0.1948	0
GCF_000716535.1	Streptomyces flaveolus	strain=NRRL B-1589	77.9411	22.5	[20.2 - 24.9%]	0.195	0
GCF_900460115.1	Streptomyces griseus	strain=NCTC7807	77.9411	22.7	[20.4 - 25.1%]	0.1931	0
GCF_000340845.1	Streptomyces hygroscopicus subsp. jinggangensis TL01	strain=TL01	77.9407	22.4	[20.2 - 24.9%]	0.1952	0
GCF_004195885.1	Streptomyces albidoflavus	strain=NBRC 12790	77.9398	22.5	[20.3 - 25%]	0.1944	0
GCF_004346005.1	Streptomyces sp. BK308	strain=BK308	77.9397	22.2	[19.9 - 24.6%]	0.1978	0
GCF_001905005.1	Streptomyces sp. CB02923	strain=CB02923	77.9396	22.7	[20.4 - 25.1%]	0.1933	0
GCF_014650735.1	Streptomyces canarius	strain=JCM 4733	77.9386	22.1	[19.9 - 24.6%]	0.1981	0
GCF_002754435.1	Streptomyces sp. 76	strain=76	77.9382	22.6	[20.3 - 25%]	0.194	0
GCF_002846625.1	Streptomyces sp. OK885	strain=OK885	77.938	22.6	[20.3 - 25.1%]	0.1936	0
GCF_014648915.1	Streptomyces phaeofaciens	strain=JCM 4125	77.9339	22.4	[20.1 - 24.8%]	0.1958	0
GCF_014650835.1	Streptomyces galilaeus	strain=JCM 4757	77.9335	22.2	[19.9 - 24.6%]	0.1976	0
GCF_014649655.1	Streptomyces humidus	strain=JCM 4386	77.9306	22.4	[20.2 - 24.9%]	0.1954	0
GCF_014203595.1	Streptomyces echinatus	strain=CECT 3313	77.9303	22.3	[20 - 24.7%]	0.1967	0
GCF_900230275.1	Streptomyces sp. OV198	strain=OV198	77.9299	22.6	[20.3 - 25%]	0.1939	0
GCF_014650295.1	Streptomyces caelestis	strain=JCM 4566	77.9292	22.3	[20 - 24.7%]	0.1968	0
GCF_006715185.1	Streptomyces sp. SLBN-115	strain=RJA2910	77.929	22.4	[20.1 - 24.8%]	0.1961	0
GCF_900091845.1	Streptomyces sp. SolWspMP-5a-2	strain=SolWspMP-5a-2	77.9285	22.5	[20.2 - 24.9%]	0.1952	0
GCF_003429565.1	Streptomyces triticagri	strain=NEAU-YY421	77.9278	22.1	[19.8 - 24.5%]	0.1987	0
GCF_009863095.1	Streptomyces sp. SID4950	strain=SID4950	77.9272	22.5	[20.2 - 24.9%]	0.1952	0
GCF_014645835.1	Streptomyces albiflavescens	strain=CGMCC 4.7111	77.9271	22.4	[20.1 - 24.9%]	0.1955	0
GCF_009735685.1	Streptomyces sp. TRM66187	strain=TRM 66187	77.9261	22.9	[20.6 - 25.3%]	0.1913	0
GCF_004196115.1	Streptomyces albidoflavus	strain=FXJ8.008	77.9258	22.5	[20.2 - 25%]	0.1945	0
GCF_004784465.1	Streptomyces griseoluteus	strain=JCM 4765	77.9253	21.9	[19.6 - 24.3%]	0.2002	0
GCF_014650235.1	Streptomyces violaceochromogenes	strain=JCM 4530	77.9247	22.2	[19.9 - 24.6%]	0.1976	0
GCF_003595235.1	Streptomyces griseorubiginosus	strain=3E-1	77.9241	22.6	[20.3 - 25.1%]	0.1938	0
GCF_002846295.1	Streptomyces sp. 59	strain=59	77.9232	22.4	[20.1 - 24.8%]	0.1957	0
GCF_000154965.1	Streptomyces sviceus ATCC 29083	strain=ATCC 29083	77.9222	22.4	[20.1 - 24.8%]	0.1961	0
GCF_009862925.1	Streptomyces sp. SID5470	strain=SID5470	77.9222	22.4	[20.1 - 24.8%]	0.1961	0
GCF_001270635.1	Streptomyces antibioticus	strain=NRRL B-2032	77.9217	22.5	[20.2 - 24.9%]	0.1952	0
GCF_000698945.1	Streptomyces wadayamensis	strain=A23	77.9212	22.4	[20.1 - 24.8%]	0.1959	0
GCF_009709555.1	Streptomyces sp. TRM63209	strain=TRM63209	77.9196	22.4	[20.1 - 24.9%]	0.1956	0
GCF_009862625.1	Streptomyces sp. SID69	strain=SID69	77.9179	22.4	[20.1 - 24.8%]	0.1957	0
GCF_009872555.1	Streptomyces sp. SID5643	strain=SID5643	77.9168	22.2	[20 - 24.7%]	0.1971	0
GCF_013371965.1	Streptomyces sp. CAI-17	strain=CAI-17	77.9168	22.6	[20.3 - 25.1%]	0.1938	0
GCF_009863175.1	Streptomyces sp. SID4934	strain=SID4934	77.9165	22.7	[20.4 - 25.1%]	0.1934	0
GCF_900091885.1	Streptomyces sp. ScaeMP-6W	strain=ScaeMP-6W	77.9165	22.6	[20.4 - 25.1%]	0.1934	0
GCF_000373565.1	Streptomyces sp. HmicA12	strain=HmicA12	77.9146	22.1	[19.8 - 24.5%]	0.1985	0
GCF_001896135.2	Streptomyces phaeoluteigriseus	strain=DSM 41896	77.9131	22.4	[20.1 - 24.8%]	0.1957	0
GCF_002802945.1	Streptomyces sp. TSRI0384-2	strain=TSRI0384-2	77.9127	22.5	[20.2 - 24.9%]	0.195	0
GCF_010820575.1	Streptomyces tendae	strain=VITAKN	77.9127	22.2	[20 - 24.7%]	0.1971	0
GCF_003865135.1	Streptomyces chrestomyceticus JCM 4735	strain=NBRC 13444	77.9118	22.8	[20.5 - 25.2%]	0.1924	0
GCF_009864845.1	Streptomyces sp. SID8379	strain=SID8379	77.9111	22.1	[19.8 - 24.5%]	0.1985	0
GCF_003048205.2	Streptomyces chartreusis	strain=WZS021	77.911	22.5	[20.2 - 25%]	0.1945	0
GCF_014646275.1	Streptomyces kronopolitis	strain=CGMCC 4.7323	77.9105	22.3	[20.1 - 24.8%]	0.1963	0
GCF_000725655.1	Streptomyces sp. NRRL S-1896	strain=NRRL S-1896	77.9099	22.6	[20.3 - 25%]	0.194	0
GCF_014191845.1	Streptomyces violarus	strain=CECT 3237	77.9092	22.2	[20 - 24.7%]	0.1973	0
GCF_008806595.1	Streptomyces sp. HIT-DPA4	strain=HIT-DPA4	77.9062	22.1	[19.9 - 24.6%]	0.1979	0
GCF_008634025.1	Streptomyces albofaciens JCM 4342	strain=ATCC 23873	77.9027	22.9	[20.7 - 25.4%]	0.1909	0
GCF_000722015.1	Streptomyces sp. NRRL S-474	strain=NRRL S-474	77.9026	22.5	[20.2 - 24.9%]	0.1948	0
GCF_002154505.1	Streptomyces carpinensis	strain=NRRL B-16921	77.9014	22.6	[20.3 - 25.1%]	0.1936	0
GCF_004342785.1	Streptomyces sp. BK387	strain=BK387	77.9012	22.3	[20 - 24.7%]	0.1966	0
GCF_009769735.1	Streptomyces sp. BA2	strain=BA2	77.9	22.2	[19.9 - 24.6%]	0.1976	0
GCF_900112965.1	Streptomyces mirabilis	strain=OK461	77.8996	22.5	[20.2 - 24.9%]	0.1948	0
GCF_004125265.1	Streptomyces lydicus	strain=ATCC 31975	77.8959	22.7	[20.5 - 25.2%]	0.1926	0
GCF_001509485.1	Streptomyces sp. NRRL F-4489	strain=NRRL F-4489	77.8956	22.6	[20.3 - 25%]	0.194	0
GCF_005869865.1	Streptomyces tibetensis	strain=XZ 46	77.8953	22.4	[20.2 - 24.9%]	0.1952	0
GCF_007655005.1	Streptomyces tibetensis	strain=XZ 46	77.8953	22.4	[20.2 - 24.9%]	0.1952	0
GCF_004195835.1	Streptomyces albidoflavus	strain=FXJ8.011	77.8948	22.6	[20.3 - 25.1%]	0.1938	0
GCF_014650115.1	Streptomyces olivaceoviridis	strain=JCM 4499	77.8914	22.2	[19.9 - 24.6%]	0.1975	0
GCF_009834125.1	Streptomyces sp. GS7	strain=GS7	77.891	22.7	[20.4 - 25.1%]	0.1933	0
GCF_002154555.1	Streptomyces murinus	strain=NRRL B-2286	77.8908	22.5	[20.2 - 25%]	0.1946	0
GCF_002940705.1	Streptomyces sp. 46	strain=46	77.89	22.5	[20.2 - 24.9%]	0.1952	0
GCF_001590865.1	Streptomyces sp. NBRC 110611	strain=NBRC 110611	77.8898	22.9	[20.6 - 25.3%]	0.1913	0
GCF_009827025.1	Streptomyces sp. HUCO-GS316	strain=HUCO-GS316	77.8898	22.1	[19.8 - 24.5%]	0.1984	0
GCF_000383595.1	Streptomyces bottropensis ATCC 25435	strain=ATCC 25435	77.8894	22.5	[20.3 - 25%]	0.1944	0
GCF_001514065.1	Streptomyces antibioticus	strain=DSM 40234	77.8892	22.3	[20 - 24.7%]	0.1966	0
GCF_000383635.1	Streptomyces sp. 303MFCol5.2	strain=303MFCol5.2	77.8888	22.2	[19.9 - 24.6%]	0.1979	0
GCF_003945525.1	Streptomyces sp. WAC 01438	strain=WAC 01438	77.8886	22.4	[20.1 - 24.8%]	0.1961	0
GCF_000332625.1	Streptomyces viridochromogenes Tue57	strain=Tue57	77.8878	22.3	[20 - 24.7%]	0.1968	0
GCF_014257025.1	Streptomyces sp. PSKA01	strain=PSKA01	77.8871	22	[19.7 - 24.4%]	0.1994	0
GCF_005048155.1	Streptomyces piniterrae	strain=jys28	77.8863	22.7	[20.4 - 25.2%]	0.1928	0
GCF_003046555.1	Streptomyces sp. VMFN-G11Ma	strain=VMFN-G11Ma	77.886	22.1	[19.9 - 24.6%]	0.1981	0
GCF_006516935.1	Streptomyces griseorubiginosus	strain=BTU6	77.8839	22.5	[20.2 - 24.9%]	0.1948	0
GCF_000721945.1	Streptomyces sp. NRRL WC-3774	strain=NRRL WC-3774	77.8798	22.4	[20.1 - 24.8%]	0.196	0
GCF_014083905.1	Streptomyces lincolnensis	strain=B48	77.8793	22.6	[20.3 - 25%]	0.1942	0
GCF_000718945.1	Streptomyces sp. NRRL S-813	strain=NRRL S-813	77.8787	22.5	[20.3 - 25%]	0.1944	0
GCF_001514055.1	Streptomyces corchorusii	strain=DSM 40340	77.8781	22.3	[20.1 - 24.8%]	0.1963	0
GCF_000717895.1	Streptomyces sp. NRRL WC-3744	strain=NRRL WC-3744	77.878	22.4	[20.2 - 24.9%]	0.1953	0
GCF_004115015.1	Streptomyces sp. MG	strain=MG	77.8775	22.2	[20 - 24.7%]	0.1972	0
GCF_001885705.1	Streptomyces cinnamoneus	strain=ATCC 12686	77.877	22.9	[20.6 - 25.3%]	0.1915	0
GCF_002754595.1	Streptomyces sp. 93	strain=93	77.877	22.7	[20.4 - 25.2%]	0.1928	0
GCF_003675345.1	Streptomyces albus	strain=ZD11	77.8765	22.9	[20.6 - 25.4%]	0.1912	0
GCF_000707925.2	Streptomyces rimosus R6-500	strain=R6-500	77.8764	22.6	[20.3 - 25%]	0.1941	0
GCF_900079405.2	Streptomyces sp. F-1		77.8755	22.3	[20 - 24.7%]	0.1967	0
GCF_003977835.1	Streptomyces sp. WAC 01420	strain=WAC 01420	77.8749	22.3	[20 - 24.7%]	0.1966	0
GCF_001005405.1	Streptomyces scabiei	strain=NRRL B-16523	77.8735	22.8	[20.6 - 25.3%]	0.1917	0
GCF_002156095.1	Streptomyces sp. NRRL B-24085	strain=NRRL B-24085	77.8728	22.4	[20.2 - 24.9%]	0.1953	0
GCF_001485125.1	Streptomyces scabiei	strain=S58	77.8702	22.7	[20.4 - 25.1%]	0.1931	0
GCF_000721525.1	Streptomyces sp. NRRL F-3307	strain=NRRL F-3307	77.8697	22.5	[20.2 - 24.9%]	0.1951	0
GCF_001969965.1	Streptomyces sparsogenes DSM 40356	strain=DSM 40356	77.8685	22.5	[20.2 - 24.9%]	0.1949	0
GCF_001513965.1	Streptomyces cellostaticus	strain=DSM 40189	77.8682	22.3	[20 - 24.7%]	0.1968	0
GCF_003634225.1	Streptomyces sp. 3212.4	strain=3212.4	77.8675	22.4	[20.2 - 24.9%]	0.1952	0
GCF_000719285.1	Streptomyces bicolor	strain=NRRL B-5348	77.8661	22.5	[20.2 - 24.9%]	0.1949	0
GCF_001513955.1	Streptomyces pseudovenezuelae	strain=DSM 40212	77.8644	22.2	[19.9 - 24.6%]	0.1977	0
GCF_001514195.1	Streptomyces griseorubiginosus	strain=DSM 40469	77.8642	22.5	[20.3 - 25%]	0.1944	0
GCF_014930355.1	Streptomyces sp. ND05-3B	strain=ND05-3B	77.864	22.5	[20.2 - 24.9%]	0.1948	0
GCF_003259365.1	Streptomyces sp. PsTaAH-137	strain=PsTaAH-137	77.8635	22	[19.7 - 24.4%]	0.1998	0
GCF_013363625.1	Streptomyces coelicolor	strain=CAI-140	77.8625	22.3	[20.1 - 24.8%]	0.1963	0
GCF_012034305.1	Streptomyces sp. AA8	strain=AA8	77.8609	23	[20.7 - 25.4%]	0.1905	0
GCF_014648935.1	Streptomyces diastaticus subsp. diastaticus	strain=JCM 4128	77.8604	22.5	[20.2 - 24.9%]	0.1949	0
GCF_007856155.1	Streptomyces qinzhouensis	strain=SSL-25	77.8598	22.7	[20.4 - 25.1%]	0.193	0
GCF_009862305.1	Streptomyces sp. SID8367	strain=SID8367	77.8596	22	[19.7 - 24.4%]	0.1998	0
GCF_014648075.1	Streptomyces ruber	strain=JCM 3131	77.8595	22.8	[20.5 - 25.2%]	0.1924	0
GCF_001189035.1	Streptomyces stelliscabiei	strain=P3825	77.859	22.6	[20.3 - 25%]	0.194	0
GCF_014649375.1	Streptomyces aurantiogriseus	strain=JCM 4346	77.8583	22.5	[20.3 - 25%]	0.1943	0
GCF_002090335.1	Streptomyces sp. MOE7	strain=MOE7	77.8578	22.6	[20.3 - 25.1%]	0.1938	0
GCF_009862685.1	Streptomyces sp. SID685	strain=SID685	77.8571	22.7	[20.4 - 25.1%]	0.193	0
GCF_002846315.1	Streptomyces sp. 73	strain=73	77.8566	22.4	[20.1 - 24.8%]	0.1958	0
GCF_000340335.1	Streptomyces bottropensis ATCC 25435	strain=ATCC 25435	77.8565	22.4	[20.1 - 24.9%]	0.1955	0
GCF_001729485.1	Streptomyces lydicus	strain=103	77.8564	22.6	[20.3 - 25.1%]	0.1938	0
GCF_003386245.1	Streptomyces sp. 67	strain=67	77.854	22.4	[20.1 - 24.9%]	0.1955	0
GCF_009870085.1	Streptomyces sp. SID5476	strain=SID5476	77.8532	22.4	[20.1 - 24.9%]	0.1955	0
GCF_000720485.1	Streptomyces ochraceiscleroticus	strain=NRRL ISP-5594	77.8529	22.5	[20.2 - 24.9%]	0.1949	0
GCF_014873495.1	Streptomyces stelliscabiei	strain=DSM 41803	77.8521	22.6	[20.3 - 25%]	0.1939	0
GCF_003933965.1	Streptomyces sp. RP5T	strain=RP5T	77.8491	22.4	[20.1 - 24.8%]	0.1958	0
GCF_001447075.1	Streptomyces hygroscopicus subsp. limoneus	strain=KCTC 1717	77.849	22.5	[20.2 - 24.9%]	0.195	0
GCF_009650765.1	Streptomyces sp. SUK 48	strain=SUK 48	77.849	22.4	[20.1 - 24.8%]	0.1958	0
GCF_014651195.1	Streptomyces spinoverrucosus	strain=JCM 5077	77.849	22.3	[20 - 24.7%]	0.1969	0
GCF_001428885.1	Streptomyces sp. Root264	strain=Root264	77.8478	22.5	[20.2 - 24.9%]	0.195	0
GCF_012275145.1	Streptomyces sp. S1D4-11	strain=S1D4-11	77.846	22.6	[20.3 - 25%]	0.1941	0
GCF_001704635.1	Streptomyces sparsogenes	strain=ATCC 25498	77.845	22.5	[20.2 - 25%]	0.1947	0
GCF_003443735.1	Streptomyces sp. CC0208	strain=CC0208	77.845	22.4	[20.1 - 24.8%]	0.196	0
GCF_015160855.1	Streptomyces ferrugineus	strain=CCTCC AA2014009	77.845	22.3	[20 - 24.8%]	0.1964	0
GCF_001280015.1	Streptomyces sp. MMG1121	strain=MMG1121	77.844	22.1	[19.9 - 24.6%]	0.198	0
GCF_013044505.1	Streptomyces sp. S3(2020)	strain=S3(2020)	77.842	22.3	[20 - 24.7%]	0.1967	0
GCF_000091305.1	Streptomyces scabiei 87.22	strain=87.22	77.8412	22.8	[20.5 - 25.2%]	0.1924	0
GCF_002155765.1	Streptomyces scabiei	strain=NRRL B-24093	77.8406	22.8	[20.5 - 25.2%]	0.1925	0
GCF_010119355.1	Streptomyces sp. TR1341	strain=TR1341	77.8369	22.4	[20.1 - 24.8%]	0.1961	0
GCF_003344445.1	Streptomyces lincolnensis	strain=LC-G	77.8362	22.5	[20.3 - 25%]	0.1945	0
GCF_004122735.1	Streptomyces sioyaensis	strain=DSM 40032	77.832	22.4	[20.2 - 24.9%]	0.1954	0
GCF_014649675.1	Streptomyces janthinus	strain=JCM 4387	77.8318	22.3	[20 - 24.7%]	0.1968	0
GCF_001418475.1	Streptomyces ossamyceticus	strain=NRRL B-3822	77.8307	22.9	[20.6 - 25.4%]	0.1912	0
GCF_014650155.1	Streptomyces purpurascens	strain=JCM 4509	77.8302	22.3	[20 - 24.7%]	0.1966	0
GCF_004363835.1	Streptomyces sp. BK561	strain=BK561	77.83	22.6	[20.3 - 25%]	0.1943	0
GCF_014493765.1	Streptomyces sp. TRM66268-LWL	strain=TRM66268-LWL	77.8299	22.4	[20.2 - 24.9%]	0.1952	0
GCF_000719365.1	Streptomyces sp. NRRL S-1448	strain=NRRL S-1448	77.8287	22.6	[20.4 - 25.1%]	0.1935	0
GCF_007280585.1	Streptomyces sp. MZ03-48	strain=MZ03-48	77.8263	22.8	[20.5 - 25.3%]	0.192	0
GCF_000718835.1	Streptomyces rimosus subsp. rimosus	strain=NRRL WC-3876	77.8258	22.6	[20.3 - 25.1%]	0.1938	0
GCF_006229535.1	Streptomyces rimosus	strain=WT5260	77.8258	22.6	[20.3 - 25.1%]	0.1937	0
GCF_004343295.1	Streptomyces sp. BK042	strain=BK042	77.8257	22.3	[20 - 24.7%]	0.1966	0
GCF_003032475.1	Streptomyces sp. P3	strain=P3	77.8247	22.6	[20.3 - 25.1%]	0.1938	0
GCF_000738715.1	Streptomyces scabiei	strain=NCPPB 4066	77.8239	22.6	[20.4 - 25.1%]	0.1935	0
GCF_007280575.1	Streptomyces sp. MZ03-37	strain=MZ03-37	77.8238	22.7	[20.4 - 25.2%]	0.1928	0
GCF_900215565.1	Streptomyces sp. Ag109_G2-15	strain=Ag109_G2-15	77.8217	22.4	[20.1 - 24.9%]	0.1955	0
GCF_013423905.1	Streptomyces sp. NEAU-sy36	strain=NEAU-sy36	77.8209	22.4	[20.2 - 24.9%]	0.1954	0
GCF_001008135.1	Streptomyces stelliscabiei	strain=NRRL B-24447	77.8208	22.7	[20.5 - 25.2%]	0.1926	0
GCF_003096915.1	Streptomyces sp. 3212.2	strain=3212.2	77.8207	22.7	[20.4 - 25.2%]	0.1928	0
GCF_000715845.1	Streptomyces monomycini	strain=NRRL B-24309	77.8198	22.9	[20.6 - 25.4%]	0.1912	0
GCF_014495685.1	Streptomyces sp. TRM68367	strain=TRM68367	77.8198	22.5	[20.2 - 24.9%]	0.195	0
GCF_004122755.1	Streptomyces sp. TM32	strain=TM32	77.8182	22.4	[20.2 - 24.9%]	0.1953	0
GCF_003955715.1	Streptomyces aquilus	strain=GGCR-6	77.8156	22.4	[20.1 - 24.8%]	0.1958	0
GCF_000720725.1	Streptomyces rimosus subsp. rimosus	strain=NRRL WC-3904	77.8147	22.7	[20.4 - 25.1%]	0.1933	0
GCF_002156075.1	Streptomyces scabiei	strain=NRRL B-2795	77.8147	23	[20.7 - 25.5%]	0.1901	0
GCF_000707965.1	Streptomyces rimosus	strain=R6-500MV9-R8	77.8144	22.5	[20.3 - 25%]	0.1943	0
GCF_900105465.1	Streptomyces sp. PAN_FS17	strain=PAN_FS17	77.8143	22.4	[20.2 - 24.9%]	0.1953	0
GCF_000707945.1	Streptomyces rimosus	strain=R6-500MV9	77.813	22.6	[20.3 - 25%]	0.194	0
GCF_003550155.1	Streptomyces sp. 3212.5	strain=3212.5	77.813	22.4	[20.1 - 24.9%]	0.1955	0
GCF_000383615.1	Streptomyces canus 299MFChir4.1	strain=299MFChir4.1	77.8128	22.1	[19.8 - 24.5%]	0.1988	0
GCF_008042075.1	Streptomyces sp. uw30	strain=uw30	77.8112	22.3	[20 - 24.8%]	0.1964	0
GCF_001984445.1	Streptomyces lydicus	strain=GS93	77.8108	22.6	[20.3 - 25%]	0.1942	0
GCF_002155725.1	Streptomyces scabiei	strain=NRRL B-2801	77.8106	22.7	[20.4 - 25.2%]	0.1929	0
GCF_014138855.1	Streptomyces costaricanus	strain=DSM 41827	77.8102	22.4	[20.1 - 24.8%]	0.1958	0
GCF_001685355.1	Streptomyces lincolnensis	strain=NRRL 2936	77.8094	22.5	[20.2 - 25%]	0.1946	0
GCF_003024195.1	Streptomyces dioscori	strain=A217	77.8083	22.6	[20.4 - 25.1%]	0.1936	0
GCF_001866665.1	Streptomyces monashensis	strain=MUSC 1	77.8072	22.3	[20 - 24.7%]	0.1967	0
GCF_004364215.1	Streptomyces sp. BK161	strain=BK161	77.8065	22.3	[20.1 - 24.8%]	0.1964	0
GCF_000725565.1	Streptomyces peucetius	strain=NRRL WC-3868	77.8046	22.5	[20.2 - 25%]	0.1945	0
GCF_006715395.1	Streptomyces sp. SLBN-31	strain=SLBN-31	77.8046	22.5	[20.3 - 25%]	0.1943	0
GCF_008064995.1	Streptomyces rochei	strain=7434AN4	77.8046	22.4	[20.1 - 24.9%]	0.1955	0
GCF_002242805.1	Streptomyces diastatochromogenes	strain=DSM 40608	77.8045	22.3	[20 - 24.7%]	0.1967	0
GCF_003143855.1	Streptomyces sp. NWU339	strain=NWU339	77.8041	22.3	[20 - 24.7%]	0.1969	0
GCF_005222485.1	Streptomyces griseoviridis	strain=K61	77.8024	22.4	[20.1 - 24.8%]	0.196	0
GCF_003963535.1	Streptomyces cyaneochromogenes	strain=MK-45	77.8022	22.6	[20.3 - 25%]	0.194	0
GCF_001280045.1	Streptomyces sp. NRRL WC-3723	strain=NRRL WC-3723	77.8013	22.5	[20.2 - 24.9%]	0.1948	0
GCF_000829715.2	Streptomyces lydicamycinicus	strain=NBRC 110027	77.8005	22.3	[20.1 - 24.8%]	0.1963	0
GCF_009184865.1	Streptomyces sp. GY16	strain=GY16	77.8005	22.5	[20.2 - 25%]	0.1945	0
GCF_008704715.1	Streptomyces chartreusis	strain=ATCC 14922	77.8004	22.4	[20.2 - 24.9%]	0.1953	0
GCF_009796285.1	Streptomyces sp. T44	strain=T44	77.7985	22.2	[19.9 - 24.6%]	0.1976	0
GCF_000331185.1	Streptomyces rimosus subsp. rimosus ATCC 10970	strain=ATCC 10970	77.7974	22.6	[20.3 - 25.1%]	0.1937	0
GCF_009862935.1	Streptomyces sp. SID5471	strain=SID5471	77.7974	22.6	[20.3 - 25.1%]	0.1937	0
GCF_000818195.1	Streptomyces sp. 150FB	strain=150FB	77.7971	22.4	[20.2 - 24.9%]	0.1952	0
GCF_000719255.1	Streptomyces varsoviensis	strain=NRRL B-3589	77.7965	22.8	[20.5 - 25.2%]	0.1922	0
GCF_001279065.1	Streptomyces rimosus subsp. rimosus	strain=NRRL WC-3869	77.7963	22.6	[20.3 - 25%]	0.1943	0
GCF_013364195.1	Streptomyces sp. NA04227	strain=NA04227	77.7955	23	[20.7 - 25.4%]	0.1905	0
GCF_004104485.1	Streptomyces sp. endophyte_N2	strain=endophyte_N2	77.7942	22.4	[20.1 - 24.8%]	0.1957	0
GCF_900105275.1	Streptomyces sp. KS_5	strain=KS_5	77.7942	22.4	[20.2 - 24.9%]	0.1952	0
GCF_013363615.1	Streptomyces sp. CAI-85	strain=CAI-85	77.7939	22.3	[20 - 24.7%]	0.1965	0
GCF_011044995.1	Streptomyces sp. YC504	strain=YC504	77.7935	22.4	[20.1 - 24.8%]	0.196	0
GCF_000716845.1	Streptomyces capuensis	strain=NRRL B-12337	77.7924	22.6	[20.3 - 25%]	0.1943	0
GCF_000958545.1	Streptomyces sp. FxanaA7	strain=FxanaA7	77.7923	22.4	[20.1 - 24.9%]	0.1956	0
GCF_014930405.1	Streptomyces sp. NE06-02F	strain=NE06-02F	77.7922	22.5	[20.2 - 24.9%]	0.1949	0
GCF_015163075.1	Streptomyces sp. 3R004	strain=3R004	77.7922	22.2	[20 - 24.7%]	0.1971	0
GCF_014930365.1	Streptomyces sp. NE06-02D	strain=NE06-02D	77.792	22.5	[20.2 - 24.9%]	0.1948	0
GCF_003610145.1	Streptomyces sp. 2112.5	strain=2112.5	77.7918	22.7	[20.4 - 25.2%]	0.1928	0
GCF_014205035.1	Streptomyces nodosus	strain=DSM 40109	77.7894	22.4	[20.1 - 24.8%]	0.1959	0
GCF_000719185.1	Streptomyces rimosus subsp. rimosus	strain=NRRL B-2660	77.7883	22.5	[20.2 - 25%]	0.1947	0
GCF_001279985.1	Streptomyces sp. AS58	strain=AS58	77.7875	22.2	[20 - 24.7%]	0.1971	0
GCF_000721155.1	Streptomyces lavendulae subsp. lavendulae	strain=NRRL B-2775	77.785	22.5	[20.2 - 25%]	0.1946	0
GCF_014930415.1	Streptomyces sp. ND05-13A	strain=ND05-13A	77.7823	22.5	[20.2 - 24.9%]	0.1949	0
GCF_900102245.1	Streptomyces sp. KS_16	strain=KS_16	77.7822	22.7	[20.4 - 25.1%]	0.1931	0
GCF_001279775.1	Streptomyces sp. MMG1533	strain=MMG1533	77.782	22.3	[20 - 24.8%]	0.1965	0
GCF_001418645.1	Streptomyces neyagawaensis	strain=NRRL B-3092	77.7818	23	[20.7 - 25.5%]	0.19	0
GCF_012273495.1	Streptomyces sp. RPA4-5	strain=RPA4-5	77.7805	22.5	[20.3 - 25%]	0.1945	0
GCF_003261055.1	Streptomyces sp. ZFG47	strain=ZFG47	77.7795	22.4	[20.1 - 24.8%]	0.1957	0
GCF_014852655.1	Streptomyces sp. ID-01-6.2a	strain=ID-01-6.2a	77.7783	22.4	[20.2 - 24.9%]	0.1952	0
GCF_014648955.1	Streptomyces gougerotii	strain=JCM 4136	77.7782	22.4	[20.2 - 24.9%]	0.1952	0
GCF_009862765.1	Streptomyces sp. SID6137	strain=SID6137	77.778	22.7	[20.4 - 25.2%]	0.1929	0
GCF_009811555.1	Streptomyces caniferus	strain=NBRC 15389	77.7778	22.6	[20.3 - 25.1%]	0.1938	0
GCF_000720805.1	Streptomyces violaceoruber	strain=NRRL S-981	77.7756	22.5	[20.2 - 25%]	0.1946	0
GCF_003688995.1	Streptomyces shenzhenensis	strain=193	77.7752	22	[19.8 - 24.5%]	0.1991	0
GCF_013870495.1	Streptomyces sp. W18L9	strain=W18L9	77.7746	22.9	[20.6 - 25.3%]	0.1914	0
GCF_000718015.1	Streptomyces catenulae	strain=NRRL B-2342	77.773	22.3	[20.1 - 24.8%]	0.1962	0
GCF_900105235.1	Streptomyces sp. 2133.1	strain=2133.1	77.7716	22.7	[20.4 - 25.1%]	0.1931	0
GCF_000718865.1	Streptomyces rimosus subsp. rimosus	strain=NRRL WC-3882	77.7699	22.6	[20.3 - 25%]	0.1941	0
GCF_001704275.1	Streptomyces noursei ATCC 11455	strain=ATCC 11455	77.7693	22.7	[20.4 - 25.1%]	0.1932	0
GCF_000745715.1	Streptomyces mirabilis	strain=OV308	77.7692	22.1	[19.8 - 24.5%]	0.1985	0
GCF_001550325.1	Streptomyces europaeiscabiei	strain=89-04	77.7692	23.2	[20.9 - 25.6%]	0.189	0
GCF_005786655.1	Streptomyces montanus	strain=NEAU-C151	77.7685	22.2	[20 - 24.7%]	0.1971	0
GCF_001866675.1	Streptomyces sp. MUSC 14	strain=MUSC 14	77.7677	22.3	[20 - 24.7%]	0.1967	0
GCF_000411315.1	Streptomyces sp. HGB0020	strain=HGB0020	77.767	22.3	[20 - 24.7%]	0.1968	0
GCF_001279365.1	Streptomyces sp. NRRL F-5755	strain=NRRL F-5755	77.7663	22.6	[20.3 - 25%]	0.1939	0
GCF_000717345.1	Streptomyces lydicus	strain=NRRL ISP-5461	77.7636	22.4	[20.1 - 24.8%]	0.196	0
GCF_900187385.1	Streptomyces sp. 2114.4	strain=2114.4	77.7636	22.7	[20.4 - 25.1%]	0.1931	0
GCF_004342105.1	Streptomyces sp. BK674	strain=BK674	77.763	22.3	[20 - 24.7%]	0.1967	0
GCF_000725465.1	Streptomyces bicolor	strain=NRRL B-3897	77.7624	22.5	[20.2 - 24.9%]	0.195	0
GCF_008704655.1	Streptomyces rimosus	strain=ATCC 10970	77.7622	22.6	[20.4 - 25.1%]	0.1935	0
GCF_000717815.1	Streptomyces rimosus subsp. rimosus	strain=NRRL WC-3924	77.7596	22.5	[20.2 - 25%]	0.1945	0
GCF_000383655.1	Streptomyces sp. 351MFTsu5.1	strain=351MFTsu5.1	77.7591	22.2	[19.9 - 24.6%]	0.1979	0
GCF_003947555.1	Streptomyces sp. WAC 05379	strain=WAC 05379	77.7578	22.4	[20.2 - 24.9%]	0.1954	0
GCF_003977875.1	Streptomyces sp. WAC 01325	strain=WAC 01325	77.7575	22.4	[20.1 - 24.8%]	0.1961	0
GCF_003933295.1	Streptomyces griseofuscus	strain=64	77.7567	22.2	[20 - 24.7%]	0.1971	0
GCF_003752655.1	Streptomyces griseorubiginosus	strain=SAI-142	77.7565	22.3	[20.1 - 24.8%]	0.1964	0
GCF_000718305.1	Streptomyces niger	strain=NRRL B-3857	77.7555	22.5	[20.2 - 24.9%]	0.1948	0
GCF_000717285.1	Streptomyces rimosus subsp. rimosus	strain=NRRL ISP-5260	77.755	22.5	[20.3 - 25%]	0.1945	0
GCF_000725475.1	Streptomyces durhamensis	strain=NRRL B-3309	77.754	22.3	[20 - 24.8%]	0.1965	0
GCF_000972385.1	Streptomyces sp. WM6386	strain=WM6386	77.7514	22.1	[19.8 - 24.5%]	0.1984	0
GCF_900105915.1	Streptomyces sp. 2224.1	strain=2224.1	77.7514	22.7	[20.5 - 25.2%]	0.1926	0
GCF_900114955.1	Streptomyces sp. cf124	strain=CF124	77.7498	22.5	[20.2 - 24.9%]	0.195	0
GCF_007994955.1	Streptomyces sp. ISID311	strain=ISID311	77.7492	22.5	[20.2 - 24.9%]	0.1948	0
GCF_001541145.1	Streptomyces albus subsp. albus	strain=NRRL F-4371	77.7484	22.6	[20.3 - 25.1%]	0.1936	0
GCF_900221035.1	Streptomyces sp. 2323.1	strain=2323.1	77.7462	22.5	[20.2 - 25%]	0.1946	0
GCF_001514305.1	Streptomyces sp. RV15	strain=RV15	77.7454	22.2	[19.9 - 24.6%]	0.1975	0
GCF_000719505.1	Streptomyces sp. NRRL B-3229	strain=NRRL B-3229	77.7446	22.4	[20.1 - 24.8%]	0.1959	0
GCF_900290235.1	Streptomyces sp. MA5143a		77.7445	22.4	[20.1 - 24.8%]	0.1959	0
GCF_002114065.1	Streptomyces griseofuscus	strain=NG1-7	77.7434	22.4	[20.2 - 24.9%]	0.1954	0
GCF_000716515.1	Streptomyces rimosus subsp. rimosus	strain=NRRL B-16073	77.7433	22.5	[20.3 - 25%]	0.1943	0
GCF_000718675.1	Streptomyces rimosus subsp. rimosus	strain=NRRL WC-3930	77.7431	22.6	[20.3 - 25.1%]	0.1938	0
GCF_001279375.1	Streptomyces rimosus subsp. rimosus	strain=NRRL WC-3898	77.743	22.6	[20.3 - 25%]	0.1942	0
GCF_001279025.1	Streptomyces sp. NRRL WC-3701	strain=NRRL WC-3701	77.7425	22.6	[20.3 - 25%]	0.1943	0
GCF_014649495.1	Streptomyces filipinensis	strain=JCM 4369	77.7411	22.3	[20 - 24.7%]	0.197	0
GCF_001418655.1	Streptomyces phaeochromogenes	strain=NRRL B-1248	77.7394	22.6	[20.3 - 25%]	0.194	0
GCF_013363715.1	Streptomyces sp. CAI-21	strain=CAI-21	77.7394	22.6	[20.3 - 25.1%]	0.1936	0
GCF_900105525.1	Streptomyces sp. 2314.4	strain=2314.4	77.7384	22.5	[20.2 - 24.9%]	0.195	0
GCF_002300315.1	Streptomyces sp. 2321.6	strain=2321.6	77.7375	22.7	[20.4 - 25.1%]	0.1931	0
GCF_007050945.1	Streptomyces sp. IB201691-2A2	strain=IB201691-2A2	77.7371	22.3	[20.1 - 24.8%]	0.1961	0
GCF_014649775.1	Streptomyces longisporoflavus	strain=JCM 4396	77.7369	22.2	[19.9 - 24.6%]	0.1976	0
GCF_001419765.1	Streptomyces torulosus	strain=NRRL B-3889	77.7349	22.8	[20.5 - 25.2%]	0.1923	0
GCF_001507395.1	Streptomyces rimosus subsp. rimosus	strain=NRRL WC-3897	77.7339	22.5	[20.3 - 25%]	0.1943	0
GCF_003384795.1	Streptomyces sp. 75	strain=75	77.7337	22.3	[20 - 24.7%]	0.1967	0
GCF_002754515.1	Streptomyces sp. 1121.2	strain=1121.2	77.7335	22.7	[20.4 - 25.2%]	0.1929	0
GCF_004320085.1	Streptomyces kasugaensis	strain=AM-2504	77.7324	22.6	[20.3 - 25%]	0.1942	0
GCF_003947265.1	Streptomyces sp. WAC 00631	strain=WAC 00631	77.7321	22.6	[20.3 - 25%]	0.1942	0
GCF_009862525.1	Streptomyces sp. SID7810	strain=SID7810	77.7318	22.8	[20.5 - 25.2%]	0.1922	0
GCF_014650635.1	Streptomyces albulus	strain=JCM 4718	77.7297	22.5	[20.2 - 25%]	0.1947	0
GCF_014930395.1	Streptomyces sp. ND05-01C	strain=ND05-01C	77.7269	22.5	[20.2 - 25%]	0.1946	0
GCF_001514035.1	Streptomyces yokosukanensis	strain=DSM 40224	77.7265	22.2	[20 - 24.7%]	0.1973	0
GCF_013055795.1	Streptomyces sp. I05A-00742	strain=I05A-00742	77.7234	22.7	[20.4 - 25.2%]	0.1928	0
GCF_001270585.1	Streptomyces griseoflavus	strain=NRRL B-1830	77.7227	22.5	[20.2 - 25%]	0.1946	0
GCF_003574445.1	Streptomyces sp. YIM 130001	strain=YIM 130001	77.7225	22.1	[19.9 - 24.6%]	0.1981	0
GCF_007827595.1	Streptomyces sp. BK340	strain=BK340	77.7205	22.2	[19.9 - 24.6%]	0.1975	0
GCF_014852565.1	Streptomyces sp. ID-03-3A	strain=ID-03-3A	77.7203	22.4	[20.2 - 24.9%]	0.1953	0
GCF_000373585.1	Streptomyces sp. MspMP-M5	strain=MspMP-M5	77.7198	22.3	[20.1 - 24.8%]	0.1961	0
GCF_009862225.1	Streptomyces sp. SID8354	strain=SID8354	77.7198	22.3	[20.1 - 24.8%]	0.1961	0
GCF_003814525.1	Streptomyces sp. SAI-083	strain=W SAI-097	77.719	22.2	[19.9 - 24.7%]	0.1974	0
GCF_000716455.1	Streptomyces sp. NRRL B-11253	strain=NRRL B-11253	77.718	22.5	[20.3 - 25%]	0.1945	0
GCF_001279105.1	Streptomyces rimosus subsp. rimosus	strain=NRRL WC-3873	77.718	22.6	[20.3 - 25%]	0.1941	0
GCF_003994395.1	Streptomyces griseoviridis	strain=F1-27	77.7174	22.4	[20.1 - 24.8%]	0.196	0
GCF_001642695.1	Streptomyces chilikensis	strain=RC 1830	77.7173	22.8	[20.5 - 25.2%]	0.1922	0
GCF_001279015.1	Streptomyces rimosus subsp. rimosus	strain=NRRL WC-3909	77.7172	22.6	[20.3 - 25%]	0.1941	0
GCF_000280865.1	Streptomyces auratus AGR0001	strain=AGR0001	77.7158	22.4	[20.2 - 24.9%]	0.1953	0
GCF_014647875.1	Streptomyces brasiliensis	strain=JCM 3086	77.7158	22	[19.7 - 24.4%]	0.1995	0
GCF_008704855.1	Streptomyces platensis	strain=ATCC 23948	77.7151	22.5	[20.3 - 25%]	0.1943	0
GCF_004684805.1	Streptomyces palmae	strain=JCM 31289	77.7131	22.8	[20.5 - 25.3%]	0.1919	0
GCF_000720715.1	Streptomyces rimosus subsp. rimosus	strain=NRRL WC-3900	77.7129	22.6	[20.3 - 25%]	0.1942	0
GCF_003933485.1	Streptomyces griseofuscus	strain=199	77.7125	22.3	[20.1 - 24.8%]	0.1963	0
GCF_003947575.1	Streptomyces sp. WAC 06783	strain=WAC 06783	77.7125	22.6	[20.3 - 25%]	0.194	0
GCF_014284355.1	Streptomyces sp. AC536	strain=AC536	77.7112	23.3	[21 - 25.7%]	0.1882	0
GCF_001418585.1	Streptomyces griseoruber	strain=NRRL B-1818	77.7105	22.8	[20.5 - 25.3%]	0.1921	0
GCF_010548375.1	Streptomyces sp. SID13726	strain=SID13726	77.7084	22.3	[20.1 - 24.8%]	0.1962	0
GCF_001542625.1	Streptomyces griseochromogenes	strain=ATCC 14511	77.7081	22.3	[20 - 24.7%]	0.1969	0
GCF_014650195.1	Streptomyces umbrinus	strain=JCM 4521	77.7074	22.4	[20.1 - 24.8%]	0.1959	0
GCF_000375625.1	Streptomyces sp. FxanaC1	strain=FxanaC1	77.7047	22.2	[20 - 24.7%]	0.1971	0
GCF_009865035.1	Streptomyces sp. SID8375	strain=SID8375	77.7047	22.2	[20 - 24.7%]	0.1971	0
GCF_000718815.1	Streptomyces sp. NRRL WC-3703	strain=NRRL WC-3703	77.7042	22.5	[20.3 - 25%]	0.1945	0
GCF_014650315.1	Streptomyces chartreusis	strain=JCM 4570	77.7035	22.3	[20 - 24.8%]	0.1965	0
GCF_002119195.1	Streptomyces platensis	strain=DSM 40041	77.7012	22.3	[20 - 24.7%]	0.1969	0
GCF_000718715.1	Streptomyces rimosus subsp. rimosus	strain=NRRL WC-3874	77.7009	22.6	[20.3 - 25%]	0.194	0
GCF_003947585.1	Streptomyces sp. WAC 06725	strain=WAC 06725	77.7006	22.7	[20.5 - 25.2%]	0.1926	0
GCF_000720175.1	Streptomyces sp. NRRL S-337	strain=NRRL S-337	77.7003	22.7	[20.4 - 25.1%]	0.1932	0
GCF_014295035.1	Streptomyces sp. AC541	strain=AC541	77.6994	23.1	[20.8 - 25.6%]	0.1894	0
GCF_003584825.1	Streptomyces europaeiscabiei	strain=ST1229	77.6988	23	[20.7 - 25.4%]	0.1906	0
GCF_014673495.1	Streptomyces griseofuscus	strain=DSM 40191	77.6982	22.4	[20.2 - 24.9%]	0.1952	0
GCF_000720605.1	Streptomyces rimosus subsp. rimosus	strain=NRRL WC-3558	77.6981	22.5	[20.3 - 25%]	0.1944	0
GCF_000497445.1	Streptomyces roseochromogenus subsp. oscitans DS 12.976	strain=DS 12.976	77.6971	22.4	[20.2 - 24.9%]	0.1952	0
GCF_001514205.1	Streptomyces griseoruber	strain=DSM 40281	77.6959	22.5	[20.2 - 24.9%]	0.1948	0
GCF_003550115.1	Streptomyces sp. 2233.2	strain=2233.2	77.695	22.7	[20.4 - 25.1%]	0.1931	0
GCF_001514045.1	Streptomyces canus	strain=DSM 40275	77.6936	22.1	[19.9 - 24.6%]	0.198	0
GCF_000935125.1	Streptomyces natalensis ATCC 27448	strain=ATCC 27448	77.6931	22.5	[20.2 - 24.9%]	0.1952	0
GCF_000718295.1	Streptomyces capuensis	strain=NRRL B-3501	77.6925	22.6	[20.3 - 25%]	0.1942	0
GCF_014656275.1	Streptomyces ederensis	strain=JCM 4958	77.6924	22.3	[20 - 24.7%]	0.1969	0
GCF_001550375.1	Streptomyces europaeiscabiei	strain=96-14	77.6921	23.1	[20.8 - 25.5%]	0.1898	0
GCF_009811635.1	Streptomyces tubercidicus	strain=NBRC 13090	77.6918	22.7	[20.4 - 25.2%]	0.1929	0
GCF_001279075.1	Streptomyces rimosus subsp. rimosus	strain=NRRL WC-3875	77.6898	22.6	[20.3 - 25%]	0.1942	0
GCF_900104865.1	Streptomyces sp. 2112.2	strain=2112.2	77.6889	22.5	[20.2 - 24.9%]	0.1951	0
GCF_000721045.1	Streptomyces rimosus subsp. rimosus	strain=NRRL B-2626	77.6878	22.5	[20.3 - 25%]	0.1945	0
GCF_008905045.1	Streptomyces sp. TRM68295	strain=TRM68295	77.684	22.6	[20.3 - 25%]	0.1942	0
GCF_002797835.1	Streptomyces sp. 2333.5	strain=2333.5	77.6838	22.5	[20.2 - 24.9%]	0.1951	0
GCF_014138905.1	Streptomyces phaeogriseichromatogenes	strain=DSM 40710	77.6836	22.5	[20.2 - 24.9%]	0.1949	0
GCF_000720255.1	Streptomyces griseus subsp. griseus	strain=NRRL WC-3645	77.6795	22.3	[20 - 24.7%]	0.1967	0
GCF_009862025.1	Streptomyces sp. SID4946	strain=SID4946	77.6791	22.4	[20.1 - 24.8%]	0.196	0
GCF_900091985.1	Streptomyces sp. DconLS	strain=DconLS	77.6791	22.4	[20.1 - 24.8%]	0.196	0
GCF_004794665.1	Streptomyces sp. S816	strain=S816	77.6778	22.5	[20.2 - 24.9%]	0.1948	0
GCF_000720565.1	Streptomyces rimosus subsp. rimosus	strain=NRRL WC-3925	77.6773	22.6	[20.3 - 25%]	0.1942	0
GCF_004343515.1	Streptomyces sp. BK335	strain=BK335	77.6771	22.1	[19.8 - 24.5%]	0.1986	0
GCF_001509475.1	Streptomyces regalis	strain=NRRL 3151	77.6762	22.4	[20.2 - 24.9%]	0.1952	0
GCF_003389455.1	Streptomyces sp. NEAU-D10	strain=NEAU-D10	77.6755	22.6	[20.3 - 25%]	0.1939	0
GCF_900091975.1	Streptomyces sp. LamerLS-31b	strain=LamerLS-31b	77.6747	22.3	[20 - 24.7%]	0.1968	0
GCF_013375055.1	Streptomyces chartreusis	strain=NA02069	77.6743	22.5	[20.2 - 25%]	0.1946	0
GCF_014650595.1	Streptomyces alanosinicus	strain=JCM 4714	77.6742	22	[19.7 - 24.4%]	0.1993	0
GCF_004341055.1	Streptomyces sp. BK329	strain=BK329	77.6733	22.4	[20.1 - 24.8%]	0.1957	0
GCF_900142595.1	Streptomyces yunnanensis	strain=CGMCC 4.3555	77.6733	22.5	[20.2 - 24.9%]	0.1951	0
GCF_000716745.1	Streptomyces rimosus subsp. rimosus	strain=NRRL B-8076	77.6699	22.6	[20.3 - 25.1%]	0.1938	0
GCF_000746395.1	Streptomyces mirabilis	strain=YR139	77.6684	22.3	[20.1 - 24.8%]	0.1962	0
GCF_009377205.1	Streptomyces phyllanthi	strain=TISTR 2346	77.6684	22.6	[20.3 - 25.1%]	0.1936	0
GCF_000980885.2	Streptomyces malaysiense	strain=MUSC 136	77.6683	22.3	[20 - 24.7%]	0.1965	0
GCF_009811575.1	Streptomyces glebosus	strain=NBRC 13786	77.6666	22.6	[20.4 - 25.1%]	0.1935	0
GCF_001005085.2	Streptomyces humi	strain=MUSC 119	77.6662	22.3	[20.1 - 24.8%]	0.1963	0
GCF_009208535.1	Streptomyces mobaraensis	strain=US-43	77.6662	22.9	[20.6 - 25.4%]	0.1911	0
GCF_002261115.1	Streptomyces kasugaensis	strain=BCRC 12349	77.666	22.4	[20.2 - 24.9%]	0.1953	0
GCF_000220705.2	Streptomyces xinghaiensis S187	strain=S187	77.6642	22.6	[20.4 - 25.1%]	0.1936	0
GCF_900105775.1	Streptomyces sp. 2112.3	strain=2112.3	77.6636	22.7	[20.4 - 25.2%]	0.1928	0
GCF_000718635.1	Streptomyces varsoviensis	strain=NRRL ISP-5346	77.6624	22.8	[20.5 - 25.2%]	0.1924	0
GCF_004368645.1	Streptomyces sp. BK447	strain=BK447	77.6618	22.2	[19.9 - 24.6%]	0.1977	0
GCF_002891315.1	Streptomyces noursei	strain=JCM 4701	77.6594	22.7	[20.4 - 25.1%]	0.1931	0
GCF_000988945.1	Streptomyces europaeiscabiei	strain=NRRL B-24443	77.659	22.8	[20.5 - 25.3%]	0.192	0
GCF_009811615.1	Streptomyces libani subsp. rufus	strain=NBRC 15424	77.657	22.5	[20.2 - 24.9%]	0.1952	0
GCF_000717805.1	Streptomyces sp. NRRL WC-3702	strain=NRRL WC-3702	77.6552	22.5	[20.2 - 25%]	0.1946	0
GCF_008704995.1	Streptomyces nodosus	strain=ATCC 14899	77.6544	22.4	[20.1 - 24.9%]	0.1956	0
GCF_013030945.1	Streptomyces morookaense	strain=DSM 40503	77.652	22.4	[20.1 - 24.9%]	0.1956	0
GCF_000720765.1	Streptomyces sp. NRRL S-646	strain=NRRL S-646	77.6519	22.2	[19.9 - 24.6%]	0.1976	0
GCF_001279095.1	Streptomyces rimosus subsp. rimosus	strain=NRRL WC-3899	77.6494	22.6	[20.3 - 25%]	0.1941	0
GCF_009862845.1	Streptomyces sp. SID6139	strain=SID6139	77.6494	22.7	[20.4 - 25.1%]	0.1932	0
GCF_000718315.1	Streptomyces griseofuscus	strain=NRRL B-5429	77.6469	22.3	[20 - 24.8%]	0.1965	0
GCF_000720995.1	Streptomyces celluloflavus	strain=NRRL B-2493	77.6441	22.3	[20.1 - 24.8%]	0.1963	0
GCF_000718755.1	Streptomyces rimosus subsp. rimosus	strain=NRRL WC-3560	77.6428	22.5	[20.2 - 24.9%]	0.195	0
GCF_000719605.1	Streptomyces sp. NRRL S-1813	strain=NRRL S-1813	77.6416	22.4	[20.1 - 24.8%]	0.1958	0
GCF_000816025.1	Streptomyces sp. 769	strain=769	77.6415	22.5	[20.3 - 25%]	0.1944	0
GCF_009862505.1	Streptomyces sp. SID7805	strain=SID7805	77.6414	22.3	[20.1 - 24.8%]	0.1963	0
GCF_002754455.1	Streptomyces sp. 2233.5	strain=2233.5	77.6413	22.7	[20.4 - 25.2%]	0.1929	0
GCF_002754715.1	Streptomyces sp. 70	strain=70	77.6382	22.4	[20.1 - 24.9%]	0.1955	0
GCF_004337435.2	Streptomyces sp. KM273126	strain=KM273126	77.6358	22.5	[20.3 - 25%]	0.1944	0
GCF_900090095.1	Streptomyces sp. SceaMP-e96	strain=SceaMP-e96	77.6352	22.3	[20 - 24.8%]	0.1965	0
GCF_001418565.1	Streptomyces graminilatus	strain=NRRL B-59124	77.6345	22.7	[20.4 - 25.2%]	0.1928	0
GCF_000342125.1	Streptomyces mobaraensis NBRC 13819 = DSM 40847	strain=DSM 40847	77.6331	22.9	[20.6 - 25.3%]	0.1915	0
GCF_900103585.1	Streptomyces sp. cf386	strain=CF386	77.6323	22.5	[20.2 - 24.9%]	0.1949	0
GCF_004023625.1	Streptomyces cavernae	strain=SYSU K10008	77.6307	22.5	[20.3 - 25%]	0.1944	0
GCF_009863085.1	Streptomyces sp. SID4951	strain=SID4951	77.6304	22.3	[20 - 24.8%]	0.1965	0
GCF_004028635.1	Streptomyces cyaneus	strain=CGMCC 4.1671	77.6301	22.4	[20.1 - 24.8%]	0.1961	0
GCF_001187435.1	Streptomyces caatingaensis	strain=CMAA 1322	77.6291	22.7	[20.4 - 25.1%]	0.1931	0
GCF_002705665.1	Streptomyces sp. SceaMP-e96	strain=SceaMP-e96	77.6276	22.3	[20 - 24.8%]	0.1965	0
GCF_009865475.1	Streptomyces sp. SID2888	strain=SID2888	77.6265	22.4	[20.1 - 24.8%]	0.1959	0
GCF_008087005.1	Streptomyces sp. WAC01526	strain=WAC01526	77.6234	22.5	[20.3 - 25%]	0.1944	0
GCF_014284425.1	Streptomyces sp. AC563	strain=AC563	77.6222	23.2	[20.9 - 25.6%]	0.1887	0
GCF_002291145.1	Streptomyces sp. SA15	strain=SA15	77.6194	22.3	[20.1 - 24.8%]	0.1963	0
GCF_001279345.1	Streptomyces rimosus subsp. pseudoverticillatus	strain=NRRL WC-3896	77.6174	22.6	[20.3 - 25%]	0.194	0
GCF_003814935.1	Streptomyces sp. Ag82_G5-5	strain=Ag82_G5-5	77.6128	22.2	[19.9 - 24.7%]	0.1974	0
GCF_002082195.1	Streptomyces gilvosporeus	strain=F607	77.61	22.5	[20.2 - 24.9%]	0.1948	0
GCF_014656235.1	Streptomyces glebosus	strain=JCM 4954	77.6073	22.4	[20.1 - 24.9%]	0.1956	0
GCF_000718855.1	Streptomyces lavendulae subsp. lavendulae	strain=NRRL WC-3532	77.6056	22.5	[20.3 - 25%]	0.1943	0
GCF_003112515.1	Streptomyces fragilis	strain=NBRC 12862	77.6017	22.5	[20.2 - 24.9%]	0.1951	0
GCF_001746295.1	Streptomyces sp. LUP47B	strain=LUP47b	77.6014	22.1	[19.8 - 24.5%]	0.1987	0
GCF_000819545.1	Streptomyces nodosus	strain=ATCC 14899	77.6007	22.4	[20.1 - 24.8%]	0.1957	0
GCF_014253015.1	Streptomyces sp. TYQ1024	strain=TYQ1024	77.5956	22.8	[20.5 - 25.3%]	0.192	0
GCF_000718165.1	Streptomyces fulvoviolaceus	strain=NRRL B-2870	77.5952	22.1	[19.9 - 24.6%]	0.198	0
GCF_014650715.1	Streptomyces bluensis	strain=JCM 4729	77.5921	22.1	[19.8 - 24.6%]	0.1983	0
GCF_002803155.1	Streptomyces sp. CB02959	strain=CB02959	77.5908	22.5	[20.2 - 24.9%]	0.1951	0
GCF_002705975.1	Streptomyces sp. AmelKG-E11A	strain=AmelKG-E11A	77.5902	22.8	[20.5 - 25.3%]	0.192	0
GCF_009865305.1	Streptomyces sp. SID4919	strain=SID4919	77.5902	22.8	[20.5 - 25.3%]	0.192	0
GCF_003851665.1	Streptomyces albulus	strain=NBRC 14147	77.5884	22.3	[20.1 - 24.8%]	0.1962	0
GCF_014645815.1	Streptomyces fuscichromogenes	strain=CGMCC 4.7110	77.5883	22.3	[20 - 24.8%]	0.1964	0
GCF_009811595.1	Streptomyces libani subsp. libani	strain=NBRC 13452	77.587	22.5	[20.2 - 24.9%]	0.1949	0
GCF_001270495.1	Streptomyces viridochromogenes	strain=NRRL 3413	77.5868	22.2	[20 - 24.7%]	0.1973	0
GCF_014654785.1	Streptomyces mashuensis	strain=JCM 4059	77.5854	22.3	[20 - 24.8%]	0.1965	0
GCF_014656295.1	Streptomyces sulfonofaciens	strain=JCM 5069	77.5796	22.9	[20.6 - 25.4%]	0.1909	0
GCF_014648695.1	Streptomyces albospinus	strain=JCM 3399	77.579	22.4	[20.2 - 24.9%]	0.1954	0
GCF_002761895.1	Streptomyces sp. JV178	strain=JV178	77.5773	22.5	[20.2 - 24.9%]	0.1951	0
GCF_004125275.1	Streptomyces lydicus	strain=SW_ACT1	77.5773	22.6	[20.3 - 25%]	0.1942	0
GCF_004196335.1	Streptomyces rimosus	strain=M527	77.5767	22.6	[20.3 - 25%]	0.194	0
GCF_014656115.1	Streptomyces morookaense	strain=JCM 4793	77.576	22.3	[20 - 24.7%]	0.1967	0
GCF_000772895.1	Streptomyces galbus	strain=KCCM 41354	77.5748	22.5	[20.2 - 25%]	0.1947	0
GCF_014649275.1	Streptomyces libani subsp. libani	strain=JCM 4322	77.5728	22.3	[20 - 24.7%]	0.1969	0
GCF_001270485.1	Streptomyces viridochromogenes	strain=NRRL 3416	77.5721	22.2	[20 - 24.7%]	0.1971	0
GCF_000403765.2	Streptomyces albulus CCRC 11814	strain=CCRC 11814	77.5703	22.3	[20 - 24.7%]	0.1968	0
GCF_001514235.1	Streptomyces caeruleatus	strain=NRRL B-24802	77.5693	22.4	[20.2 - 24.9%]	0.1952	0
GCF_000935185.3	Streptomyces albulus	strain=CK-15	77.5614	22.4	[20.1 - 24.8%]	0.1957	0
GCF_000695235.1	Streptomyces albulus	strain=NK660	77.5587	22.4	[20.1 - 24.8%]	0.1959	0
GCF_000952035.2	Streptomyces lydicus	strain=A02	77.5586	22.5	[20.3 - 25%]	0.1945	0
GCF_000720685.1	Streptomyces rimosus subsp. rimosus	strain=NRRL WC-3877	77.5575	22.6	[20.3 - 25%]	0.194	0
GCF_001905345.1	Streptomyces uncialis	strain=DCA2648	77.5552	23	[20.7 - 25.4%]	0.1906	0
GCF_001047325.1	Streptomyces viridochromogenes	strain=NRRL 3414	77.5544	22.3	[20 - 24.7%]	0.197	0
GCF_003122345.2	Streptomyces xinghaiensis	strain=OlgR	77.5503	22.5	[20.2 - 24.9%]	0.1948	0
GCF_001270575.1	Streptomyces decoyicus	strain=NRRL 2666	77.5502	22.6	[20.3 - 25.1%]	0.1938	0
GCF_001294335.1	Streptomyces chattanoogensis	strain=NRRL ISP-5002	77.5479	22.3	[20 - 24.7%]	0.1969	0
GCF_001953885.1	Streptomyces sp. IMTB 2501	strain=IMTB 2501	77.5454	22.3	[20 - 24.7%]	0.1967	0
GCF_001756925.1	Streptomyces fradiae	strain=Olg4R	77.5441	22.6	[20.3 - 25.1%]	0.1938	0
GCF_000720595.1	Streptomyces rimosus subsp. rimosus	strain=NRRL WC-3927	77.5428	22.5	[20.3 - 25%]	0.1943	0
GCF_002217755.1	Streptomyces hyaluromycini	strain=NBRC 110483	77.5405	22.2	[19.9 - 24.6%]	0.1976	0
GCF_003674045.1	Streptomyces griseocarneus	strain=132	77.5379	22.5	[20.3 - 25%]	0.1943	0
GCF_000504065.1	Streptomyces albulus PD-1	strain=PD-1	77.5328	22.2	[20 - 24.7%]	0.197	0
GCF_000738695.1	Streptomyces scabiei	strain=NCPPB 4086	77.5328	22.7	[20.4 - 25.1%]	0.1932	0
GCF_000718895.1	Streptomyces rimosus subsp. rimosus	strain=NRRL WC-3880	77.5307	22.6	[20.3 - 25%]	0.1942	0
GCF_013364335.1	Streptomyces sp. NA00687	strain=NA00687	77.5307	23.1	[20.8 - 25.6%]	0.1894	0
GCF_002966105.1	Streptomyces xinghaiensis	strain=OlgR2-7A	77.5299	22.5	[20.2 - 24.9%]	0.1948	0
GCF_001553435.1	Streptomyces hygroscopicus subsp. hygroscopicus	strain=NBRC 16556	77.5285	22.4	[20.1 - 24.8%]	0.196	0
GCF_006547165.1	Streptomyces ipomoeae	strain=B12321	77.5249	22.6	[20.4 - 25.1%]	0.1934	0
GCF_002155735.1	Streptomyces scabiei	strain=NRRL B-2796	77.5235	23	[20.8 - 25.5%]	0.1899	0
GCF_001425805.1	Streptomyces sp. Root369	strain=Root369	77.5211	22	[19.8 - 24.5%]	0.1989	0
GCF_900110735.1	Streptomyces radiopugnans	strain=CGMCC 4.3519	77.5197	22	[19.7 - 24.5%]	0.1992	0
GCF_003814765.1	Streptomyces sp. TLI_185	strain=TLI_185	77.5152	22.3	[20.1 - 24.8%]	0.1963	0
GCF_001570645.1	Streptomyces hygroscopicus subsp. hygroscopicus	strain=NBRC 100766	77.5148	22.3	[20 - 24.8%]	0.1965	0
GCF_005768555.2	Streptomyces sporangiiformans	strain=NEAU-SSA 1	77.5126	22.4	[20.1 - 24.8%]	0.196	0
GCF_009377235.1	Streptomyces sp. K1PN6	strain=K1PN6	77.5092	22.4	[20.1 - 24.9%]	0.1955	0
GCF_001553455.1	Streptomyces hygroscopicus subsp. hygroscopicus	strain=NBRC 13472	77.5064	22.4	[20.2 - 24.9%]	0.1953	0
GCF_006547185.1	Streptomyces ipomoeae	strain=88-35	77.506	22.7	[20.4 - 25.1%]	0.1933	0
GCF_003568675.1	Streptomyces sporangiiformans	strain=NEAU-SSA 1	77.5046	22.4	[20.1 - 24.8%]	0.1961	0
GCF_001553475.1	Streptomyces hygroscopicus subsp. hygroscopicus	strain=NBRC 12859	77.5044	22.4	[20.1 - 24.8%]	0.1957	0
GCF_014655715.1	Streptomyces lanatus	strain=JCM 4588	77.5035	22.1	[19.8 - 24.5%]	0.1984	0
GCF_000721665.1	Streptomyces rimosus subsp. rimosus	strain=NRRL WC-3929	77.4989	22.6	[20.3 - 25%]	0.1941	0
GCF_001652895.1	Streptomyces sp. NBRC 109436	strain=NBRC 109436	77.4987	22.4	[20.1 - 24.8%]	0.1958	0
GCF_003994375.1	Streptomyces lydicus	strain=WYEC 108	77.4963	22.6	[20.3 - 25%]	0.1942	0
GCF_003173275.1	Streptomyces sp. NEAU-S7GS2	strain=NEAU-S7GS2	77.4961	22.5	[20.2 - 24.9%]	0.1948	0
GCF_011045025.1	Streptomyces sp. YC419	strain=YC419	77.496	22.2	[19.9 - 24.7%]	0.1974	0
GCF_000700005.2	Streptomyces xinghaiensis	strain=ATCC 19609	77.4926	22.5	[20.2 - 24.9%]	0.1948	0
GCF_000716805.1	Streptomyces yerevanensis	strain=NRRL B-16943	77.4911	22.2	[19.9 - 24.6%]	0.1976	0
GCF_011045015.1	Streptomyces sp. HC44	strain=HC44	77.4866	22.4	[20.1 - 24.9%]	0.1955	0
GCF_003851625.1	Streptomyces sp. NL15-2K	strain=NL15-2K	77.485	22.3	[20 - 24.7%]	0.1969	0
GCF_009377185.1	Streptomyces spongiae	strain=NBRC 106415	77.4841	22.5	[20.2 - 25%]	0.1946	0
GCF_012034935.1	Streptomyces sp. PLAI1-29	strain=PLAI1-29	77.4785	22.8	[20.5 - 25.3%]	0.1919	0
GCF_001514145.1	Streptomyces canus	strain=DSM 40017	77.476	22.1	[19.8 - 24.6%]	0.1983	0
GCF_000317595.1	Streptomyces ipomoeae 91-03	strain=91-03	77.4684	22.9	[20.7 - 25.4%]	0.1907	0
GCF_000721535.1	Streptomyces hygroscopicus subsp. hygroscopicus	strain=NRRL B-1477	77.4677	22.2	[20 - 24.7%]	0.1972	0
GCF_014653855.1	Streptomyces capitiformicae	strain=CGMCC 4.7403	77.4606	22.5	[20.2 - 24.9%]	0.1949	0
GCF_003814875.1	Streptomyces sp. Ag109_O5-1	strain=Ag109_O5-1	77.4528	22.3	[20.1 - 24.8%]	0.1962	0
GCF_006547175.1	Streptomyces ipomoeae	strain=78-51	77.4224	22.7	[20.4 - 25.1%]	0.193	0
GCF_013414305.1	Streptomyces sp. Rer75	strain=Rer75	77.421	22	[19.7 - 24.4%]	0.1996	0
GCF_001705785.1	Streptomyces hygroscopicus subsp. hygroscopicus	strain=OsiSh-2	77.4202	22.3	[20 - 24.7%]	0.1968	0
GCF_014647675.1	Streptomyces flaveus	strain=JCM 3035	77.42	22	[19.8 - 24.5%]	0.1989	0
GCF_008386495.1	Streptomyces sp. TRM68348	strain=TRM68348	77.4153	22.5	[20.2 - 24.9%]	0.195	0
GCF_001190165.1	Streptomyces fradiae	strain=olg1-1	77.4143	22.5	[20.2 - 25%]	0.1946	0
GCF_003384865.1	Streptomyces sp. 3212.3	strain=3212.3	77.4134	22.1	[19.9 - 24.6%]	0.198	0
GCF_003721215.1	Streptomyces sp. NEAU-LD23	strain=NEAU-LD23	77.413	22	[19.7 - 24.4%]	0.1993	0
GCF_001507435.1	Streptomyces sp. NRRL F-5122	strain=NRRL F-5122	77.4096	22.1	[19.8 - 24.5%]	0.1988	0
GCF_014712245.1	Streptomyces sp. 5-10	strain=5-10	77.4017	22	[19.8 - 24.5%]	0.1992	0
GCF_001280005.1	Streptomyces sp. NRRL WC-3618	strain=NRRL WC-3618	77.4003	22.2	[20 - 24.7%]	0.1973	0
GCF_002154675.1	Streptomyces reticuliscabiei	strain=NRRL B-24446	77.3916	22.3	[20.1 - 24.8%]	0.1961	0
GCF_000802245.2	Streptomyces pluripotens	strain=MUSC 135	77.3824	21.9	[19.6 - 24.3%]	0.2002	0
GCF_014646095.1	Streptomyces lacrimifluminis	strain=CGMCC 4.7272	77.3814	22.3	[20 - 24.7%]	0.197	0
GCF_001417735.1	Streptomyces sp. NBRC 110028	strain=NBRC 110028	77.373	22	[19.7 - 24.4%]	0.1997	0
GCF_008974245.1	Streptomyces abyssomicinicus	strain=CHI39	77.3716	22.5	[20.2 - 25%]	0.1946	0
GCF_002811705.1	Streptomyces barkulensis	strain=RC 1831	77.3714	22.2	[19.9 - 24.6%]	0.1977	0
GCF_900105265.1	Streptomyces sp. 3213.3	strain=3213	77.3556	22.1	[19.9 - 24.6%]	0.198	0
GCF_000376565.1	Streptomyces hokutonensis	strain=R1-NS-10	77.3474	22	[19.7 - 24.5%]	0.1993	0
GCF_000158915.1	Streptomyces himastatinicus ATCC 53653	strain=ATCC 53653	77.3384	21.8	[19.5 - 24.2%]	0.2015	0
GCF_000716435.1	Streptomyces xylophagus	strain=NRRL B-12029	77.3297	22.1	[19.8 - 24.5%]	0.1988	0
GCF_002843305.1	Streptomyces barkulensis	strain=RC 1831	77.3286	22.1	[19.8 - 24.5%]	0.1984	0
GCF_900114215.1	Streptomyces pini	strain=PL19	77.3189	21.8	[19.5 - 24.2%]	0.2013	0
GCF_005938145.1	Streptomyces sp. DASNCL29	strain=DASNCL29	77.3166	22.1	[19.8 - 24.5%]	0.1986	0
GCF_000331005.1	Streptomyces turgidiscabies Car8	strain=Car8	77.3163	22.7	[20.4 - 25.1%]	0.1933	0
GCF_010548275.1	Streptomyces sp. SID12488	strain=SID12488	77.3157	22.2	[19.9 - 24.6%]	0.1977	0
GCF_010550245.1	Streptomyces sp. SID12501	strain=SID12501	77.3082	22.4	[20.1 - 24.8%]	0.196	0
GCF_009296025.1	Streptomyces tsukubensis	strain=AT3	77.2827	22.8	[20.6 - 25.3%]	0.1917	0
GCF_001650215.1	Streptomyces sp. RTd22	strain=RTd22	77.2817	21.8	[19.5 - 24.2%]	0.2012	0
GCF_001983975.1	Streptomyces autolyticus	strain=CGMCC0516	77.2807	22	[19.8 - 24.5%]	0.1992	0
GCF_002224125.1	Streptomyces sp. NBS 14/10	strain=NBS 14/10	77.2806	22.3	[20 - 24.7%]	0.1969	0
GCF_000968685.2	Streptomyces antioxidans	strain=MUSC 164	77.2742	21.8	[19.6 - 24.3%]	0.2011	0
GCF_001485145.1	Streptomyces turgidiscabies	strain=T45	77.2736	22.2	[19.9 - 24.6%]	0.1979	0
GCF_009709575.1	Streptomyces sp. TRM43335	strain=TRM43335	77.2672	22.2	[20 - 24.7%]	0.1971	0
GCF_013364155.1	Streptomyces sp. NA02950	strain=NA02950	77.2656	22	[19.8 - 24.5%]	0.1992	0
GCF_000716605.1	Streptomyces sp. NRRL F-525	strain=NRRL F-525	77.2571	22.3	[20 - 24.7%]	0.1966	0
GCF_000816465.3	Streptomyces pluripotens	strain=MUSC 137	77.2557	21.9	[19.6 - 24.3%]	0.2003	0
GCF_002591335.1	Streptomyces malaysiensis	strain=DSM 4137	77.2531	22	[19.8 - 24.5%]	0.199	0
GCF_005405945.1	Streptomyces violaceusniger	strain=NBRC 13459	77.2493	22.1	[19.8 - 24.5%]	0.1985	0
GCF_000092385.1	Streptomyces bingchenggensis BCW-1	strain=BCW-1	77.2381	22.2	[19.9 - 24.6%]	0.1976	0
GCF_900105695.1	Streptomyces melanosporofaciens	strain=DSM 40318	77.2368	21.9	[19.7 - 24.4%]	0.2	0
GCF_014076605.1	Streptomyces sp. GMR22	strain=GMR22	77.2359	22	[19.8 - 24.5%]	0.1991	0
GCF_001509775.1	Streptomyces violaceusniger	strain=NRRL F-8817	77.2341	21.8	[19.5 - 24.2%]	0.2015	0
GCF_002154605.1	Streptomyces milbemycinicus	strain=NRRL 5739	77.2105	22.3	[20.1 - 24.8%]	0.1963	0
GCF_002954775.1	Streptomyces geranii	strain=A301	77.2083	22.2	[19.9 - 24.6%]	0.1979	0
GCF_000367365.1	Streptomyces prunicolor NBRC 13075	strain=NBRC 13075	77.2053	22.1	[19.9 - 24.6%]	0.1983	0
GCF_002155885.1	Streptomyces rhizosphaericus	strain=NRRL B-24304	77.2038	22.3	[20 - 24.7%]	0.1968	0
GCF_002007125.1	Streptomyces tsukubensis	strain=F601	77.2002	22.6	[20.4 - 25.1%]	0.1935	0
GCF_000718985.1	Streptomyces megasporus	strain=NRRL B-16372	77.1905	21.9	[19.6 - 24.3%]	0.2006	0
GCF_002812405.1	Streptomyces sp. M56	strain=M56	77.1886	22	[19.7 - 24.4%]	0.1995	0
GCF_000590515.1	Streptomyces sp. PRh5	strain=PRh5	77.1788	22	[19.7 - 24.4%]	0.1993	0
GCF_001640565.1	Streptomyces sp. RTd22	strain=RTd22	77.17	21.8	[19.5 - 24.2%]	0.2012	0
GCF_000938975.1	Streptomyces iranensis		77.1687	22	[19.7 - 24.4%]	0.1994	0
GCF_000967025.1	Streptomyces sp. NRRL B-1568	strain=NRRL B-1568	77.1624	22.5	[20.2 - 25%]	0.1946	0
GCF_002021875.1	Streptomyces hygroscopicus	strain=XM201	77.1617	22	[19.7 - 24.4%]	0.1998	0
GCF_012726235.1	Streptomyces sp. HNM0574	strain=HNM0574	77.1585	21.9	[19.6 - 24.3%]	0.2004	0
GCF_000816485.1	Streptomyces sp. MUSC 125	strain=MUSC 125	77.1453	21.8	[19.5 - 24.2%]	0.2015	0
GCF_010892295.1	Streptomyces rhizosphaericus	strain=0250	77.1161	22.1	[19.8 - 24.5%]	0.1984	0
GCF_002891865.1	Streptomyces malaysiensis	strain=F913	77.1147	22	[19.7 - 24.4%]	0.1995	0
GCF_003675955.1	Streptomyces rapamycinicus NRRL 5491	strain=NRRL 5491	77.1128	22	[19.8 - 24.5%]	0.1989	0
GCF_000721265.1	Streptomyces sp. NRRL F-5126	strain=NRRL F-5126	77.1122	21.6	[19.4 - 24.1%]	0.2029	0
GCF_005405925.1	Streptomyces antimycoticus	strain=NBRC 12839	77.1113	21.9	[19.7 - 24.4%]	0.2001	0
GCF_000147815.2	Streptomyces violaceusniger Tu 4113	strain=Tu 4113	77.1099	21.9	[19.6 - 24.3%]	0.2002	0
GCF_014205315.1	Streptomyces rapamycinicus	strain=DSM 41530	77.1094	22	[19.7 - 24.4%]	0.1994	0
GCF_009864805.1	Streptomyces sp. SID8382	strain=SID8382	77.1051	22.1	[19.9 - 24.6%]	0.198	0
GCF_013345665.1	Streptomyces samsunensis	strain=SA31	77.0942	21.9	[19.7 - 24.4%]	0.2	0
GCF_009862885.1	Streptomyces sp. SID5468	strain=SID5468	77.0916	21.8	[19.6 - 24.3%]	0.2008	0
GCF_900092015.1	Streptomyces sp. MnatMP-M27	strain=MnatMP-M27	77.09	22.3	[20.1 - 24.8%]	0.1961	0
GCF_002794255.1	Streptomyces carminius	strain=TRM SA0054	77.0874	22.2	[19.9 - 24.6%]	0.1977	0
GCF_002154275.1	Streptomyces antimycoticus	strain=NRRL B-24289	77.085	22	[19.8 - 24.5%]	0.1992	0
GCF_003949695.1	Streptomyces sp. WAC05858	strain=WAC05858	77.0817	21.9	[19.6 - 24.3%]	0.2007	0
GCF_011800555.1	Streptomyces malaysiensis	strain=DSM 14702	77.0777	22.2	[19.9 - 24.6%]	0.1975	0
GCF_008033485.1	Streptomyces malaysiensis	strain=TY049-057	77.075	22.1	[19.8 - 24.5%]	0.1987	0
GCF_006974005.1	Streptomyces malaysiensis	strain=DSM 4137	77.0689	22	[19.8 - 24.5%]	0.199	0
GCF_005860785.2	Streptomyces sp. So13.3	strain=So13.3	77.0456	21.7	[19.5 - 24.2%]	0.2019	0
GCF_001748165.1	Streptomyces sp. SPMA113	strain=SPMA113	77.0432	21.9	[19.6 - 24.3%]	0.2002	0
GCF_000154905.1	Streptomyces sp. SPB074	strain=SPB074	77.0369	22.9	[20.6 - 25.3%]	0.1913	0
GCF_009936315.1	Streptomyces antimycoticus	strain=NBRC 100767	77.0353	22	[19.7 - 24.4%]	0.1995	0
GCF_009864855.1	Streptomyces sp. SID8380	strain=SID8380	77.0262	23.3	[21 - 25.8%]	0.1878	0
GCF_001748085.1	Streptomyces sp. TP-A0874	strain=TP-A0874	77.0256	21.9	[19.6 - 24.3%]	0.2006	0
GCF_900091825.1	Streptomyces sp. SolWspMP-sol7th	strain=SolWspMP-sol7th	77.0199	23.2	[20.9 - 25.7%]	0.1886	0
GCF_003144095.1	Streptomyces sp. ICBB 8177	strain=ICBB 8177	77.0176	21.9	[19.7 - 24.4%]	0.2	0
GCF_003595545.1	Streptomyces sp. 11-1-2	strain=11-1-2	77.0019	22	[19.8 - 24.5%]	0.199	0
GCF_010548325.1	Streptomyces sp. SID13666	strain=SID13666	77.0018	21.6	[19.3 - 24%]	0.2033	0
GCF_010548345.1	Streptomyces sp. SID13588	strain=SID13588	76.9309	21.6	[19.4 - 24.1%]	0.2028	0
GCF_010548245.1	Streptomyces sp. SID11385	strain=SID11385	76.9254	22.9	[20.6 - 25.4%]	0.1912	0
GCF_003121295.1	Streptomyces orinoci	strain=NRRL B-3379	76.914	22.1	[19.9 - 24.6%]	0.1981	0
GCF_011882225.1	Streptomyces sp. NEAU-H3	strain=NEAU-H3	76.9088	23.1	[20.8 - 25.5%]	0.1896	0
GCF_013302945.1	Streptomyces sp. 8P21H-1	strain=8P21H-1	76.8805	22.6	[20.3 - 25.1%]	0.1938	0
GCF_003268555.1	Streptomyces sp. ST1020	strain=ST1020	76.8584	22.3	[20 - 24.7%]	0.1969	0
GCF_003268535.1	Streptomyces sp. ST1015	strain=ST1015	76.8494	22.1	[19.9 - 24.6%]	0.1981	0
GCF_004795255.1	Streptomyces sp. RKND-216	strain=RKND-216	76.8465	21.5	[19.3 - 23.9%]	0.204	0
GCF_003665095.1	Streptomyces sp. Z26	strain=Z26	76.8319	21.6	[19.4 - 24%]	0.2031	0
GCF_001419795.1	Streptomyces niveiscabiei	strain=NRRL B-24457	76.8224	22.3	[20 - 24.7%]	0.1968	0
GCF_014083985.1	Streptomyces sp. SCUT-3	strain=SCUT-3	76.8204	22.1	[19.8 - 24.5%]	0.1986	0
GCF_000373665.1	Streptomyces sp. BoleA5	strain=BoleA5	76.814	21.6	[19.4 - 24.1%]	0.2029	0
GCF_009864915.1	Streptomyces sp. SID8377	strain=SID8377	76.814	21.6	[19.4 - 24.1%]	0.2029	0
GCF_014489635.1	Streptomyces sp. CRXT-G-22	strain=CRXT-G-22	76.8058	22.4	[20.1 - 24.9%]	0.1955	0
GCF_000426325.1	Streptomyces sp. CNS606	strain=CNS606	76.8037	21.4	[19.1 - 23.8%]	0.2056	0
GCF_900188405.1	Streptomyces glauciniger	strain=CGMCC 4.1858	76.7818	21.5	[19.3 - 23.9%]	0.204	0
GCF_000158855.1	Streptomyces sp. SPB78	strain=SPB78	76.7794	23	[20.7 - 25.4%]	0.1907	0
GCF_003129505.1	Streptomyces sp. V2	strain=V2	76.7738	22	[19.7 - 24.4%]	0.1998	0
GCF_000179215.1	Streptomyces sp. SA3_actF	strain=SA3_actF	76.7628	23.1	[20.8 - 25.6%]	0.1895	0
GCF_000240165.1	Streptomyces cattleya NRRL 8057 = DSM 46488	strain=DSM 46488	76.7287	21.9	[19.6 - 24.3%]	0.2008	0
GCF_900091815.1	Streptomyces sp. DfronAA-171	strain=DfronAA-171	76.7236	22.9	[20.6 - 25.4%]	0.191	0
GCF_000213055.1	Streptomyces sp. Tu6071	strain=Tu6071	76.7163	22.8	[20.6 - 25.3%]	0.1917	0
GCF_000237305.1	Streptomyces cattleya NRRL 8057 = DSM 46488	strain=NRRL 8057	76.7078	21.7	[19.5 - 24.2%]	0.2019	0
GCF_002288075.1	Streptomyces sp. CLI2509	strain=CLI2905	76.6992	22.8	[20.5 - 25.2%]	0.1922	0
GCF_000424825.1	Streptomyces sp. CNH287	strain=CNH287	76.6991	21.3	[19.1 - 23.7%]	0.206	0
GCF_003999195.1	Streptomyces sp. LAM7114	strain=LAM7114	76.6799	21.7	[19.5 - 24.2%]	0.2018	0
GCF_000424845.1	Streptomyces sp. TAA040	strain=TAA040	76.6656	21.5	[19.3 - 24%]	0.2037	0
GCF_013302895.1	Streptomyces albus subsp. chlorinus	strain=NRRL B-24108	76.6559	22	[19.7 - 24.4%]	0.1995	0
GCF_001941265.1	Streptomyces acidiscabies	strain=98-49	76.6413	22.4	[20.1 - 24.8%]	0.1957	0
GCF_001941275.1	Streptomyces acidiscabies	strain=98-48	76.6318	22.1	[19.9 - 24.6%]	0.1982	0
GCF_900091485.1	Streptomyces sp. LcepLS	strain=LcepLS	76.6283	22.7	[20.4 - 25.2%]	0.193	0
GCF_009862405.1	Streptomyces sp. SID4945	strain=SID4945	76.6227	22.8	[20.5 - 25.2%]	0.1922	0
GCF_001723065.1	Streptomyces rubidus	strain=NRRL B-24619	76.6124	22.3	[20 - 24.8%]	0.1964	0
GCF_004123705.1	Streptomyces sp. GZWMJZ-114	strain=GZWMJZ-114	76.5966	22.7	[20.4 - 25.1%]	0.1932	0
GCF_001189015.1	Streptomyces acidiscabies	strain=NCPPB 4445	76.5948	22	[19.7 - 24.4%]	0.1997	0
GCF_900091755.1	Streptomyces sp. TverLS-915	strain=TverLS-915	76.5887	22.9	[20.6 - 25.3%]	0.1916	0
GCF_014156695.1	Streptomyces durbertensis	strain=DSM 104538	76.5871	22.5	[20.2 - 24.9%]	0.1949	0
GCF_001941325.1	Streptomyces acidiscabies	strain=FL01	76.5842	22.1	[19.8 - 24.5%]	0.1985	0
GCF_000719475.1	Streptomyces sp. NRRL F-5630	strain=NRRL F-5630	76.5708	22.8	[20.5 - 25.3%]	0.1918	0
GCF_001751375.1	Streptomyces qinglanensis	strain=SCSIO M10379	76.5591	21.5	[19.2 - 23.9%]	0.2044	0
GCF_013870535.1	Streptomyces sp. PIP175	strain=PIP175	76.5548	22.4	[20.1 - 24.8%]	0.196	0
GCF_007097205.2	Streptomyces alkaliterrae	strain=OF1	76.5543	22	[19.7 - 24.5%]	0.1992	0
GCF_000242715.1	Streptomyces acidiscabies 84-104	strain=84-104	76.5328	22.1	[19.8 - 24.5%]	0.1987	0
GCF_014779715.1	Streptomyces chumphonensis	strain=KK1-2	76.5207	21.4	[19.1 - 23.8%]	0.2054	0
GCF_001418545.1	Streptomyces albus	strain=NRRL B-1335	76.5076	22	[19.7 - 24.4%]	0.1996	0
GCF_013618515.1	Streptomyces alkaliterrae	strain=OF3	76.5022	22.1	[19.8 - 24.5%]	0.1986	0
GCF_000745345.1	Streptomyces yeochonensis CN732	strain=CN732	76.4999	22.7	[20.4 - 25.1%]	0.1934	0
GCF_001941285.1	Streptomyces acidiscabies	strain=85-06	76.4885	22.3	[20 - 24.8%]	0.1964	0
GCF_003584805.1	Streptomyces acidiscabies	strain=ST105	76.4752	22.3	[20 - 24.7%]	0.1968	0
GCF_000411495.1	Streptomyces sp. HPH0547	strain=HPH0547	76.4683	21.8	[19.5 - 24.2%]	0.2013	0
GCF_000179195.1	Streptomyces sp. SA3_actG	strain=SA3_actG	76.4519	22.7	[20.5 - 25.2%]	0.1926	0
GCF_009863225.1	Streptomyces sp. SID4926	strain=SID4926	76.4516	22.7	[20.5 - 25.2%]	0.1926	0
GCF_001949645.1	Streptomyces acidiscabies	strain=a2	76.4514	21.9	[19.6 - 24.3%]	0.2005	0
GCF_000514715.1	Streptomyces sp. CNH099	strain=CNH099	76.4331	21.1	[18.9 - 23.6%]	0.2076	0
GCF_900112845.1	Streptomyces alni	strain=CGMCC 4.3510	76.4315	21.8	[19.5 - 24.2%]	0.2012	0
GCF_000719425.1	Streptomyces sp. NRRL F-5639	strain=NRRL F-5639	76.4181	21.7	[19.5 - 24.2%]	0.2019	0
GCF_001661615.1	Streptomyces albus	strain=NRRL B-12378	76.417	22	[19.7 - 24.4%]	0.1997	0
GCF_014596445.1	Streptomyces sp. CBMA29	strain=CBMA29	76.4153	22	[19.7 - 24.4%]	0.1998	0
GCF_000719735.1	Streptomyces sp. NRRL F-5917	strain=NRRL F-5917	76.4119	21.7	[19.4 - 24.1%]	0.2022	0
GCF_014204855.1	Streptomyces haliclonae	strain=DSM 41968	76.4105	21.7	[19.5 - 24.2%]	0.2017	0
GCF_003265665.1	Streptomyces qinglanensis	strain=172205	76.3901	21.8	[19.5 - 24.2%]	0.2015	0
GCF_013618545.1	Streptomyces alkaliterrae	strain=OF8	76.3893	21.9	[19.6 - 24.3%]	0.2003	0
GCF_900103985.1	Streptomyces guanduensis	strain=CGMCC 4.2022	76.3861	21.9	[19.7 - 24.4%]	0.2	0
GCF_001485105.1	Streptomyces acidiscabies	strain=a10	76.3853	21.9	[19.7 - 24.4%]	0.2	0
GCF_014203645.1	Streptomyces zagrosensis	strain=CECT 8305	76.3823	22.2	[19.9 - 24.6%]	0.1979	0
GCF_900091855.1	Streptomyces sp. DvalAA-14	strain=DvalAA-14	76.377	22.2	[19.9 - 24.6%]	0.1977	0
GCF_009863045.1	Streptomyces sp. SID4948	strain=SID4948	76.3693	22.2	[19.9 - 24.6%]	0.1974	0
GCF_900111245.1	Streptomyces qinglanensis	strain=CGMCC 4.6825	76.3679	21.6	[19.4 - 24.1%]	0.2027	0
GCF_013450295.1	Streptomyces sp. AJS327	strain=AJS327	76.3665	21.8	[19.5 - 24.2%]	0.2017	0
GCF_000813365.1	Streptomyces albus	strain=NBRC 13014	76.3653	21.7	[19.5 - 24.2%]	0.2018	0
GCF_000725885.1	Streptomyces albus subsp. albus	strain=NRRL B-1811	76.3578	21.7	[19.5 - 24.2%]	0.2019	0
GCF_000424765.1	Streptomyces sp. CNT318	strain=CNT318	76.3504	21.3	[19.1 - 23.8%]	0.2057	0
GCF_000716525.1	Streptomyces graminis	strain=NRRL B-1570	76.3433	21.8	[19.5 - 24.2%]	0.2015	0
GCF_000720885.1	Streptomyces albus subsp. albus	strain=NRRL B-2362	76.335	21.7	[19.5 - 24.2%]	0.2019	0
GCF_004768505.1	Streptomyces albus	strain=DSM 40763	76.321	21.9	[19.6 - 24.3%]	0.2004	0
GCF_001418505.1	Streptomyces albus	strain=NRRL B-2465	76.3104	21.9	[19.6 - 24.3%]	0.2007	0
GCF_001418125.1	Streptomyces albus	strain=NRRL B-1685	76.306	22	[19.7 - 24.4%]	0.1998	0
GCF_011044975.1	Streptomyces sp. A7024	strain=A7024	76.3034	21.6	[19.3 - 24%]	0.2034	0
GCF_011006355.1	Streptomyces albus	strain=CAS922	76.297	21.8	[19.6 - 24.3%]	0.2009	0
GCF_009604385.1	Streptomyces sp. RB5	strain=RB5	76.2779	21.6	[19.3 - 24%]	0.2034	0
GCF_000280905.1	Streptomyces sp. AA1529	strain=AA1529	76.2667	21.4	[19.2 - 23.9%]	0.2049	0
GCF_002754675.1	Streptomyces sp. CNZ279	strain=CNZ279	76.2645	21.5	[19.2 - 23.9%]	0.2044	0
GCF_900110255.1	Streptomyces rubidus	strain=CGMCC 4.2026	76.259	21.7	[19.4 - 24.1%]	0.2025	0
GCF_011045075.1	Streptomyces sp. SB3404	strain=SB3404	76.2493	21.7	[19.4 - 24.1%]	0.2026	0
GCF_900142575.1	Streptomyces paucisporeus	strain=CGMCC 4.2025	76.248	21.6	[19.3 - 24%]	0.2032	0
GCF_014207735.1	Streptomyces sp. CNZ298	strain=CNZ298	76.2112	21.5	[19.2 - 23.9%]	0.2045	0
GCF_003945505.1	Streptomyces sp. WAC 06738	strain=WAC 06738	76.1987	21.4	[19.2 - 23.9%]	0.2047	0
GCF_001751255.1	Streptomyces nanshensis	strain=SCSIO 10429	76.1965	21.8	[19.5 - 24.2%]	0.2012	0
GCF_002154495.1	Streptomyces cacaoi subsp. cacaoi	strain=NRRL B-1220	76.1913	21.8	[19.6 - 24.3%]	0.2011	0
GCF_009867075.1	Streptomyces sp. NHF165	strain=NHF165	76.1828	21.8	[19.6 - 24.3%]	0.201	0
GCF_000482585.1	Streptomyces sp. CNQ329	strain=CNQ329	76.1758	21.2	[18.9 - 23.6%]	0.2073	0
GCF_000424785.1	Streptomyces sp. CNT360	strain=CNT360	76.1746	21.5	[19.2 - 23.9%]	0.2042	0
GCF_004217635.1	Streptomyces sp. CNZ288	strain=CNZ288	76.1666	21.6	[19.3 - 24%]	0.2033	0
GCF_001493375.1	Streptomyces specialis	strain=type strain: GW41-1564	76.1564	21.3	[19.1 - 23.8%]	0.2058	0
GCF_013004455.1	Streptomyces cacaoi	strain=DSM 40057	76.1522	21.8	[19.6 - 24.3%]	0.2011	0
GCF_012034175.1	Streptomyces sp. PRB2-1	strain=PRB2-1	76.1452	21.9	[19.7 - 24.4%]	0.2002	0
GCF_013870515.1	Streptomyces sp. CAP 215	strain=CAP 215	76.1429	21.4	[19.2 - 23.9%]	0.2049	0
GCF_000721495.1	Streptomyces sp. NRRL F-5123	strain=NRRL F-5123	76.1355	21.8	[19.5 - 24.2%]	0.2012	0
GCF_002797655.1	Streptomyces sp. CNZ306	strain=CNZ306	76.1334	21.6	[19.3 - 24%]	0.2031	0
GCF_001751345.1	Streptomyces abyssalis	strain=SCSIO 10389	76.1298	21.4	[19.2 - 23.9%]	0.2048	0
GCF_000701285.1	Streptomyces sp. CNQ-525	strain=CNQ-525	76.129	21.3	[19 - 23.7%]	0.2062	0
GCF_000701325.1	Streptomyces sp. URHA0041	strain=URHA0041	76.1288	21.6	[19.3 - 24%]	0.2036	0
GCF_000424805.1	Streptomyces sp. CNQ865	strain=CNQ865	76.119	21.4	[19.1 - 23.8%]	0.2055	0
GCF_000721445.1	Streptomyces sp. NRRL F-5053	strain=NRRL F-5053	76.1157	21.8	[19.6 - 24.3%]	0.2008	0
GCF_000514995.1	Streptomyces sp. CNT371	strain=CNT371	76.1099	21.4	[19.1 - 23.8%]	0.2053	0
GCF_002847285.1	Streptomyces sp. CMB-StM0423	strain=CMB-StM0423	76.1095	21.5	[19.3 - 24%]	0.2038	0
GCF_001011035.1	Streptomyces sp. CNQ-509	strain=CNQ-509	76.1004	21.3	[19.1 - 23.8%]	0.2058	0
GCF_000424965.1	Streptomyces sp. TAA204	strain=TAA204	76.0959	21.3	[19 - 23.7%]	0.2062	0
GCF_007827615.1	Streptomyces sp. CNZ287	strain=CNZ287	76.0954	21.2	[18.9 - 23.6%]	0.2074	0
GCF_007827565.1	Streptomyces sp. CNZ289	strain=CNZ289	76.0845	21.5	[19.3 - 24%]	0.2039	0
GCF_000721305.1	Streptomyces sp. NRRL S-1868	strain=NRRL S-1868	76.0829	21.8	[19.5 - 24.2%]	0.2015	0
GCF_008312845.1	Streptomyces cacaoi	strain=OABC16	76.0824	21.8	[19.5 - 24.2%]	0.2012	0
GCF_000377105.1	Streptomyces sp. CNQ766	strain=CNQ766	76.082	21.3	[19.1 - 23.7%]	0.2061	0
GCF_003259355.1	Streptomyces sp. Amel2xB2	strain=Amel2xB2	76.0813	21.4	[19.2 - 23.9%]	0.2047	0
GCF_006539165.1	Streptomyces cacaoi subsp. cacaoi	strain=NBRC 12748	76.0703	21.8	[19.5 - 24.2%]	0.2015	0
GCF_003323735.1	Streptomyces sp. LHW50302	strain=LHW50302	76.0682	21.7	[19.4 - 24.1%]	0.2023	0
GCF_012726265.1	Streptomyces sp. HNM0575	strain=HNM0575	76.0457	21.9	[19.7 - 24.4%]	0.2	0
GCF_000377165.1	Streptomyces sp. CNY243	strain=CNY243	76.0439	21.4	[19.1 - 23.8%]	0.2053	0
GCF_001751365.1	Streptomyces abyssalis	strain=SCSIO 10390	76.0272	21.4	[19.2 - 23.8%]	0.205	0
GCF_000964305.1	Streptomyces sp. WMMB 714	strain=WMMB 714	76.0034	21.3	[19.1 - 23.7%]	0.2061	0
GCF_900090125.1	Streptomyces sp. WMMB 714	strain=WMMB 714	76.0034	21.3	[19.1 - 23.7%]	0.2061	0
GCF_014645895.1	Streptomyces daqingensis	strain=CGMCC 4.7178	76.0024	21.4	[19.2 - 23.8%]	0.2051	0
GCF_004217425.1	Streptomyces sp. CNZ301	strain=CNZ301	75.9867	21.6	[19.3 - 24%]	0.2032	0
GCF_900107965.1	Streptomyces yanglinensis	strain=CGMCC 4.2023	75.9578	21.8	[19.5 - 24.2%]	0.2015	0
GCF_000377125.1	Streptomyces sp. CNS335	strain=CNS335	75.9542	21.4	[19.1 - 23.8%]	0.2055	0
GCF_005047355.1	Streptomyces sp. NEAU-C40	strain=NEAU-C40	75.9307	21.8	[19.5 - 24.2%]	0.2017	0
GCF_000426165.1	Streptomyces sp. TAA486	strain=TAA486	75.923	21.3	[19 - 23.7%]	0.2065	0
GCF_001418285.1	Streptomyces sp. WMMB 322	strain=WMMB 322	75.8969	21.3	[19.1 - 23.7%]	0.2059	0
GCF_900090145.1	Streptomyces sp. WMMB 322	strain=WMMB 322	75.8969	21.3	[19.1 - 23.7%]	0.2059	0
GCF_002910855.1	Streptomyces sp. SM12	strain=SM12	75.8221	22.5	[20.2 - 25%]	0.1946	0
GCF_014646055.1	Streptomyces tyrosinilyticus	strain=CGMCC 4.7201	75.7716	21.5	[19.2 - 23.9%]	0.2045	0
GCF_002910755.1	Streptomyces sp. SM14	strain=SM14	75.7501	22.4	[20.1 - 24.9%]	0.1956	0
GCF_900116145.1	Streptomyces harbinensis	strain=CGMCC 4.7047	75.7187	20.9	[18.7 - 23.3%]	0.2099	0
GCF_011421595.1	Streptomyces sp. YIM 98790	strain=YIM 98790	75.715	21.8	[19.5 - 24.2%]	0.2016	0
GCF_004305975.1	Streptomyces otsuchiensis	strain=OTB305	75.6948	22.2	[19.9 - 24.6%]	0.1977	0
GCF_013364095.1	Streptomyces harbinensis	strain=NA02264	75.6868	21.2	[18.9 - 23.6%]	0.2075	0
GCF_000993785.3	Streptomyces xiamenensis	strain=MCCC 1A01550	75.6579	21.2	[19 - 23.7%]	0.2067	0
GCF_000297635.1	Streptomyces sp. AA0539	strain=AA0539	75.6563	21	[18.8 - 23.4%]	0.209	0
GCF_000719915.1	Streptomyces sp. NRRL F-2890	strain=NRRL F-2890	75.5983	21.1	[18.9 - 23.6%]	0.2079	0
GCF_004348315.1	Streptomyces sp. 8K308	strain=8K308	75.4537	21.6	[19.4 - 24.1%]	0.2028	0
GCF_003626535.1	Streptomyces hoynatensis	strain=KCTC 29097	75.4413	20.9	[18.7 - 23.4%]	0.2098	0
GCF_001751245.1	Streptomyces oceani	strain=SCSIO 02100	75.4124	21.1	[18.9 - 23.5%]	0.2079	0
GCF_004348415.1	Streptomyces hainanensis	strain=DSM 41900	75.3012	21.4	[19.1 - 23.8%]	0.2056	0
GCF_900112355.1	Streptomyces aidingensis	strain=CGMCC 4.5739	75.2812	21.2	[19 - 23.6%]	0.2071	0
GCF_012033735.1	Streptomyces lonarensis	strain=NCL716	75.2809	22	[19.8 - 24.5%]	0.1992	0
GCF_014141525.1	Streptomyces calidiresistens	strain=DSM 42108	75.2809	22.4	[20.1 - 24.9%]	0.1956	0
GCF_003635085.1	Streptomyces sp. 1114.5	strain=1114.5	75.1973	22.1	[19.8 - 24.5%]	0.1984	0
GCF_000717725.1	Streptomyces pyridomyceticus	strain=NRRL ISP-5024	75.186	22	[19.7 - 24.4%]	0.1998	0
GCF_004193175.1	Streptomyces sp. RFCAC02	strain=RFCAC02	75.1852	21.3	[19 - 23.7%]	0.2062	0
GCF_001083795.1	Streptomyces sp. SBT349	strain=SBT349	75.1809	20.8	[18.6 - 23.3%]	0.2108	0
GCF_012033785.1	Streptomyces bohaiensis	strain=11A07	75.1699	22.2	[19.9 - 24.6%]	0.1979	0
[truncated: 63 more rows]

## Sheet: TableS3
Table S3. List of 761 actinobacterial genomes used in the analysis
Accession*	Species	Infraspecific Names
GCF_000023265.1	Acidimicrobium ferrooxidans	DSM 10331
GCF_003956085.1	Acidipropionibacterium acidipropionici	WGS7
GCF_005890135.1	Acidipropionibacterium jensenii	FAM 19038
GCF_003325455.1	Acidipropionibacterium virtanenii	JS278
GCF_000015025.1	Acidothermus cellulolyticus	11B; ATCC 43068
GCF_001941625.1	Actinoalloteichus fjordicus	ADI127-7
GCF_002234535.1	Actinoalloteichus hoggarensis	DSM 45943
GCF_001747425.1	Actinoalloteichus hymeniacidonis	HPA177(T) (=DSM 45092(T))
GCF_018324685.1	Actinocatenispora sera	NBRC 101916
GCF_016865425.1	Actinocatenispora thailandica	NBRC 105041
GCF_019175365.1	Actinomadura graeca	32-07
GCF_013211575.1	Actinomadura verrucosospora	NRRL:B18236
GCF_009650215.1	Actinomarinicola tropica	SCSIO 58843
GCF_013184985.2	Actinomyces faecalis	ZJ34
GCF_002076915.1	Actinomyces gaoshouyii	pika_114
GCF_900637165.1	Actinomyces howellii	NCTC11636
GCF_003606385.1	Actinomyces lilanjuaniae	2129
GCF_013177295.1	Actinomyces marmotae	zg-325
GCF_016127855.1	Actinomyces naeslundii	FDAARGOS_1037
GCF_016127955.1	Actinomyces oris	FDAARGOS_1051
GCF_900120245.1	Actinomyces pacaensis	Marseille-P2985
GCF_004798665.1	Actinomyces procaprae	dk561
GCF_004102025.1	Actinomyces qiguomingii	410
GCF_001553565.1	Actinomyces radicidentis	CCUG 36733
GCF_014595995.2	Actinomyces respiraculi	ZJ750
GCF_900637295.1	Actinomyces slackii	NCTC11923
GCF_015711475.1	Actinomyces trachealis	zg-993
GCF_900637975.1	Actinomyces viscosus	NCTC10951
GCF_016598775.1	Actinomyces weissii	CCUG 61299
GCF_004010955.1	Actinomyces wuliandei	299
GCF_900104725.1	Actinoplanes derwentensis	DSM 43941
GCF_000494755.1	Actinoplanes friuliensis	DSM 7358
GCF_018324205.1	Actinoplanes ianthinogenes	NBRC 13996
GCF_000284295.1	Actinoplanes missouriensis	431
GCF_003711105.1	Actinoplanes teichomyceticus	ATCC 31121
GCF_900104745.1	Actinopolymorpha singaporensis	DSM 22024
GCF_002263515.1	Actinopolyspora erythraea	YIM 90600
GCF_000023245.1	Actinosynnema mirum	DSM 43827
GCF_002354875.1	Actinosynnema pretiosum	X47
GCF_000724605.1	Actinotignum schaalii	CCUG 27420
GCF_000478885.1	Adlercreutzia equolifaciens	DSM 19450
GCF_011405655.1	Adlercreutzia hattorii	8CFCBH1
GCF_003065605.1	Aeromicrobium chenweiae	592
GCF_900167475.1	Aeromicrobium choanae	9H-4
GCF_001509405.1	Aeromicrobium erythreum	AR18
GCF_000160775.2	Aeromicrobium marinum	DSM 15272
GCF_009649075.1	Aeromicrobium yanjiei	MF47
GCF_900104705.1	Agrococcus carbonis	DSM 22965
GCF_900099705.1	Agrococcus jejuensis	DSM 22002
GCF_018024495.1	Agromyces archimandritae	G127AT
GCF_001660485.1	Agromyces aureus	AR33
GCF_003070885.1	Agromyces badenianii	MF30-A
GCF_900104685.1	Agromyces flavus	CPCC 202695
GCF_008365295.1	Agromyces intestinalis	KACC 19306
GCF_006337065.1	Agromyces laixinhei	HY052
GCF_021442325.1	Agromyces marinus	DSM 26151
GCF_004135405.1	Agromyces protaetiae	FW100M-8
GCF_022811605.1	Agromyces soli	KACC 16215
GCF_900103775.1	Allokutzneria albata	DSM 44149
GCF_009664835.1	Allosaccharopolyspora coralli	E2A
GCF_021391495.1	Amycolatopsis acidiphila	KCTC 39523
GCF_018885265.1	Amycolatopsis aidingensis	YIM 96748
GCF_003312875.1	Amycolatopsis albispora	WP1
GCF_000732925.1	Amycolatopsis japonica	MG417-CF17
GCF_000400635.2	Amycolatopsis keratiniphila	HCCB10007
GCF_000454025.1	Amycolatopsis mediterranei	RB
GCF_000943515.2	Amycolatopsis orientalis	B-37
GCF_013283855.1	Aquiluna borgnonia	15G-AUS-rot
GCF_902386925.1	Arabiibacter massiliensis	MGYG-HGUT-02413
GCF_900637725.1	Arachnia propionica	NCTC12967
GCF_018128325.1	Arachnia rubra	DSMZ 100122
GCF_900475915.1	Arcanobacterium haemolyticum	NCTC8452
GCF_900105865.1	Arcanobacterium phocae	DSM 10002
GCF_016904675.1	Arcanobacterium phocisimile	DSM 26142
GCF_900631605.1	Arthrobacter agilis	NCTC2676_1
GCF_000755585.2	Arthrobacter alpinus	A3
GCF_002849715.1	Arthrobacter crystallopoietes	DSM 20117
GCF_003268655.1	Arthrobacter dokdonellae	Arthrobacter dokdonellae
GCF_018622995.1	Arthrobacter jiangjiafuii	zg-ZUI227
GCF_022637435.1	Arthrobacter sulfonylureivorans	S4-C24
GCF_018866305.1	Arthrobacter sunyaminii	zg-ZUI122
GCF_002355535.1	Aurantimicrobium minutum	KNC
GCF_003194085.1	Aurantimicrobium photophilum	MWH-Mo1
GCF_900101785.1	Auraticoccus monumenti	MON 2.2
GCF_007970665.1	Baekduia soli	BR7-21
GCF_000814825.1	Berryella intestinalis	68-1-3
GCF_000023105.1	Beutenbergia cavernae	DSM 12333
GCF_001263395.1	Bifidobacterium actinocoloniiforme	DSM 22766
GCF_003030905.1	Bifidobacterium adolescentis	1-11
GCF_001025155.1	Bifidobacterium angulatum	DSM 20098 = JCM 7096
GCF_000224965.2	Bifidobacterium animalis subsp. lactis	BLC1
GCF_000304215.1	Bifidobacterium asteroids	PRL2011
GCF_001281425.1	Bifidobacterium breve	BR3
GCF_001025195.1	Bifidobacterium catenulatum	DSM 16992 = JCM 1194 = LMG 11043
GCF_002761235.1	Bifidobacterium choerinum	FMB-1
GCF_000737865.1	Bifidobacterium coryneforme	LMG18911
GCF_014898155.1	Bifidobacterium eulemuris	DSM 100216
GCF_017357045.1	Bifidobacterium imperatoris	JCM 32708
GCF_000706765.1	Bifidobacterium indicum	LMG 11587 = DSM 20214
GCF_014898175.1	Bifidobacterium lemurum	DSM 28807
GCF_000196555.1	Bifidobacterium longum subsp. longum	JCM 1217
GCF_020541885.1	Bifidobacterium pseudocatenulatum	YIT11953
GCF_002282915.1	Bifidobacterium pseudolongum	UMB-MBP-01
GCF_017378515.1	Bifidobacterium saguini	DSMZ 23967
GCF_001042635.1	Bifidobacterium scardovii	JCM 12489 = DSM 13734
GCF_014898195.1	Bifidobacterium subtile	KCTC 3272
GCF_001856685.1	Boudabousia tangfeifanii	VUL4_3
GCF_002216795.1	Brachybacterium avium	VR2415
GCF_000023405.1	Brachybacterium faecium	DSM 4810
GCF_002407065.1	Brachybacterium ginsengisoli	DCY80
GCF_003355475.1	Brachybacterium saurashtrense	DSM 23186
GCF_002407185.1	Brachybacterium vulturis	VM2412
GCF_011617245.1	Brevibacterium atlanticum	WO024
GCF_003932995.1	Brevibacterium aurantiacum	SMQ-1419
GCF_016027415.1	Brevibacterium casei	FDAARGOS_902
GCF_011617705.1	Brevibacterium limosum	o2
GCF_003999335.1	Brevibacterium linens	ATCC 19391
GCF_011462075.1	Brevibacterium luteolum	NEB1784
GCF_017948325.1	Brevibacterium oceani	WW007
GCF_011617465.1	Brevibacterium pigmentatum	YB235
GCF_900105045.1	Brevibacterium sandarakinum	DSM 22082
GCF_900105315.1	Brevibacterium siliguriense	DSM 23676
GCF_002288305.1	Candidatus Nanopelagicus abundans	MMS-IIB-91
GCF_002288005.1	Candidatus Nanopelagicus hibericus	MMS-21-160
GCF_002287885.2	Candidatus Nanopelagicus limnes	MMS-21-122
GCF_002287965.1	Candidatus Planktophila dulcis	MMS-21-155
GCF_002288325.1	Candidatus Planktophila lacus	MMS-IIB-106
GCF_002288365.1	Candidatus Planktophila limnetica	MMS-VB-114
GCF_002288065.1	Candidatus Planktophila sulfonica	MMS-IA-56
GCF_002288185.1	Candidatus Planktophila vernalis	MMS-IIA-15
GCF_002288145.1	Candidatus Planktophila versatilis	MMS-IA-105
GCF_001854225.1	Candidatus Rhodoluna planktonica	MWH-Dar1
GCF_000024025.1	Catenulispora acidiphila	DSM 44928
GCF_000212695.1	Cellulomonas fimi	ATCC 484
GCF_000092865.1	Cellulomonas flavigena	DSM 20109
GCF_000218545.1	Cellulomonas gilvus	ATCC 13127
GCF_020412445.1	Cellulomonas iranensis	ZJW-6
GCF_004798685.1	Cellulomonas shaoxiangyii	Z28
GCF_012931845.1	Cellulomonas taurus	P40-2
GCF_018128265.1	Cellulosimicrobium cellulans	ORNL-0100
GCF_014041995.1	Changpingibacter yushuensis	JY-X040
GCF_013414345.1	Chryseoglobus indicus	CTD02-10-2
GCF_009739655.1	Clavibacter michiganensis subsp. michiganensis	UF1
GCF_014775655.1	Clavibacter zhangzhiyongii	DM1
GCF_002096055.1	Cnuibacter physcomitrellae	XA(T)
GCF_002736145.1	Collinsella aerofaciens	indica
GCF_020735465.1	Collinsella stercoris	DSM 13279; FDAARGOS_1572
GCF_000025265.1	Conexibacter woesei	DSM 14684
GCF_000195315.1	Coriobacterium glomerans	PW2
GCF_902381765.1	Corynebacterium ammoniagenes	MGYG-HGUT-01533
GCF_016728725.1	Corynebacterium amycolatum	FDAARGOS_1108
GCF_014262665.1	Corynebacterium anserum	23H37-10
GCF_001941445.1	Corynebacterium aquilae	DSM 44791; S-613
GCF_000590555.1	Corynebacterium argentoratense	DSM 44202
GCF_000732945.1	Corynebacterium atypicum	R2070
GCF_000022905.1	Corynebacterium aurimucosum	DSM 44827; ATCC 700975
GCF_000344785.1	Corynebacterium callunae	DSM 20147
GCF_000980815.1	Corynebacterium camporealensis	DSM 44610
GCF_000550785.1	Corynebacterium casei	LMG S-19264
GCF_003813965.1	Corynebacterium choanae	200CH
GCF_009734405.1	Corynebacterium comes	2019
GCF_001643015.1	Corynebacterium crudilactis	JZ16
GCF_020886775.1	Corynebacterium cyclohexanicum	ATCC 51369
GCF_900187295.1	Corynebacterium cystitidis	NCTC11863
GCF_001277995.1	Corynebacterium deserti	GIMN1.010
GCF_002843135.1	Corynebacterium diphtheriae bv. mitis	ISS 3319
GCF_000767055.1	Corynebacterium doosanense	CAU 212 = DSM 45436
GCF_000011305.1	Corynebacterium efficiens	YS-314
GCF_004795735.1	Corynebacterium endometrii	LMM-1653
GCF_001021025.1	Corynebacterium epidermidicanis	DSM 45586
GCF_020097615.1	Corynebacterium falsenii	FDAARGOS_1493
GCF_001941465.1	Corynebacterium flavescens	OJ8
GCF_001941485.1	Corynebacterium frankenforstense	DSM 45800; ST18
GCF_000143825.1	Corynebacterium genitalium	ATCC 33030
GCF_003813985.1	Corynebacterium gerontici	W8
GCF_002287505.1	Corynebacterium glaucum	DSM 30827
GCF_016728645.1	Corynebacterium glucuronolyticum	FDAARGOS_1111
GCF_000404185.1	Corynebacterium glutamicum	SCgG2
GCF_000626675.1	Corynebacterium glyciniphilum	AJ 3170
GCF_000341345.1	Corynebacterium halotolerans	YIM 70093 = DSM 44683
GCF_014117265.1	Corynebacterium hindlerae	NML 93-0612
GCF_900187215.1	Corynebacterium imitans	NCTC13015
GCF_014217255.1	Corynebacterium incognita	Marseille-Q3630
GCF_000006605.1	Corynebacterium jeikeium	K411 = NCTC 11915
GCF_009734385.1	Corynebacterium kalinowskii	1959
GCF_016599755.1	Corynebacterium kefirresidentii	FDAARGOS_1055
GCF_000023145.1	Corynebacterium kroppenstedtii	DSM 44385
GCF_000980835.1	Corynebacterium kutscheri	DSM 20755
GCF_001274895.1	Corynebacterium lactis	RW2-5
GCF_003070865.1	Corynebacterium liangguodongii	2184
GCF_011038655.2	Corynebacterium lizhenjunii	ZJ-599
GCF_014490555.1	Corynebacterium lujinxingii	zg-917
GCF_000835165.1	Corynebacterium marinum	DSM 44953
GCF_000442645.1	Corynebacterium maris	DSM 45190
GCF_900478045.1	Corynebacterium minutissimum	NCTC10288
GCF_001020985.1	Corynebacterium mustelae	DSM 45274
GCF_900103625.1	Corynebacterium mycetoides	DSM 20632
GCF_007970465.1	Corynebacterium nuruki	S6-4
GCF_009734425.1	Corynebacterium occultum	2039
GCF_004114895.1	Corynebacterium pelargi	136/3
GCF_001941565.1	Corynebacterium phocae	M408/89/1
GCF_016728665.1	Corynebacterium propinquum	FDAARGOS_1112
GCF_003814005.1	Corynebacterium pseudopelargi	812CH
GCF_001865765.1	Corynebacterium pseudotuberculosis	MEX29
GCF_011038645.2	Corynebacterium qintianiae	MC1420
GCF_900478035.1	Corynebacterium renale	NCTC7448
GCF_000177535.2	Corynebacterium resistens	DSM 45100
GCF_001263755.1	Corynebacterium riegelii	PUDD_83A45
GCF_902702935.1	Corynebacterium rouxii	FRC0190
GCF_007641235.1	Corynebacterium sanguinis	CCUG 58655
GCF_002162115.1	Corynebacterium silvaticum	PO100/5
GCF_001586235.1	Corynebacterium simulans	Wattiau
GCF_000833575.1	Corynebacterium singular	IBS B52218
GCF_001941505.1	Corynebacterium sphenisci	DSM 44792
GCF_001941345.1	Corynebacterium stationis	622=DSM 20302
GCF_016728105.1	Corynebacterium striatum	FDAARGOS_1115
GCF_002355155.1	Corynebacterium suranareeae	N24
GCF_000418365.1	Corynebacterium terpenotabidum	Y-11
GCF_001021045.1	Corynebacterium testudinoris	DSM 44614
GCF_016728365.1	Corynebacterium tuberculostearicum	FDAARGOS_1117
GCF_020616335.1	Corynebacterium uberis	18M0132
GCF_000769635.1	Corynebacterium ulcerans	05146
GCF_900187235.1	Corynebacterium urealyticum	NCTC12011
GCF_000747315.1	Corynebacterium ureicelerivorans	IMMIB RIV-2301
GCF_009026825.1	Corynebacterium urogenitale	LMM-1652
GCF_001021065.1	Corynebacterium uterequi	DSM 45634
GCF_000550805.1	Corynebacterium vitaeruminis	DSM 20294
GCF_003641245.1	Corynebacterium xerosis	GS 1
GCF_003065405.1	Corynebacterium yudongzhengii	2183
GCF_014490575.1	Corynebacterium zhongnanshanii	zg-320
GCF_003611035.1	Cryobacterium soli	GCJ02
GCF_000023845.1	Cryptobacterium curtum	DSM 15641
GCF_017909455.1	Curtobacterium flaccumfaciens pv. flaccumfaciens	BRIP:70614
GCF_022655355.1	Curtobacterium luteum	ATCC 31317
GCF_000376705.1	Cutibacterium acnes	HL096PA1
GCF_000367205.1	Cutibacterium avidum	44067
GCF_900186975.1	Cutibacterium granulosum	NCTC11865
GCF_001717565.1	Cutibacterium modestum	F0672
GCF_019904175.1	Dactylosporangium vinaceum	NRRL B-16297
GCF_001643775.1	Denitrobacterium detoxificans	NPOH1
GCF_902381725.1	Dermabacter jinjuensis	MGYG-HGUT-01448
GCF_001678905.1	Dermabacter vaginalis	AD1-86
GCF_000725405.1	Dermacoccus nishinomiyaensis	M25
GCF_900187045.1	Dermatophilus congolensis	NCTC13039
GCF_900070355.1	Devriesea agamarum	IMP2
GCF_003096075.1	Dietzia lutea	YIM 80766
GCF_003096095.1	Dietzia psychralcaliphila	ILA-1
GCF_001659785.1	Dietzia timorensis	ID05-A0528
GCF_009834925.2	Eggerthella guodeyinii	HF-1101
GCF_021378605.1	Eggerthella lenta	APC055-529-1D
GCF_004322855.1	Egibacter rhizosphaerae	EGI 80759
GCF_004300825.1	Egicoccus halophilus	EGI 80432
GCF_009834025.1	Epidermidibacterium keratini	EPI-7
GCF_003344865.1	Euzebya pacifica	DY32-46
GCF_003971195.1	Flaviflexus ciconiae	H23T48
GCF_003952265.1	Flaviflexus salsibiostraticola	KCTC 33148
GCF_000058485.1	Frankia alni	ACN14A
GCF_000013345.1	Frankia casuarinae	CcI3
GCF_000166135.1	Frankia inefficax	EuI1c
GCF_900105065.1	Friedmanniella luteola	DSM 21741
GCF_003293675.1	Gardnerella leopoldii	UGent 06.41
GCF_000025345.1	Geodermatophilus obscurus	DSM 43160
GCF_003710105.1	Georgenia faecalis	ZLJ0423
GCF_006349365.1	Georgenia wutianyii	Z294
GCF_006352065.1	Georgenia yuyongxinii	Z443
GCF_012277275.1	Gephyromycinifex aptenodytis	NJES-13
GCF_006094275.1	Glutamicibacter creatinolyticus	LGCM 259
GCF_001302565.1	Glutamicibacter halophytocola	KLBMP 5180
GCF_012221945.1	Glutamicibacter mishrai	S5-52
GCF_003687415.1	Glutamicibacter nicotianae	OTC-16
GCF_016894325.1	Glutamicibacter protophormiae	R912
GCF_004011905.1	Gordonia alkanivorans	YC-RL2
GCF_009914515.1	Gordonia amarae	BEN372
GCF_022059885.1	Gordonia amicalis	CEGA1
GCF_000024785.1	Gordonia bronchialis	DSM 43247
GCF_023078355.1	Gordonia hongkongensis	JCM 31934
GCF_003855095.1	Gordonia insulae	MMS17-SY073
GCF_002993285.1	Gordonia iterans	Co17
GCF_014041935.1	Gordonia jinghuaiqii	zg-686
GCF_020735545.1	Gordonia otitidis	FDAARGOS_1600
GCF_001305675.1	Gordonia phthalatica	QH-11
GCF_000247715.1	Gordonia polyisoprenivorans	VH2
GCF_009914535.1	Gordonia pseudoamarae	BEN371
GCF_014070455.1	Gordonia rubripertincta	SD5
GCF_007559005.1	Gordonia zhaorongruii	HY186
GCF_003627055.1	Gryllotalpicola protaetiae	2DFW10M-5
GCF_009708215.1	Haloactinobacterium kanbiaonis	HY164
GCF_000214175.1	Hoyosella subflava	DQS3-9A1
GCF_000348785.1	Ilumatobacter coccineus	YM16-304
GCF_000184685.1	Intrasporangium calvum	DSM 43043
GCF_001636295.1	Isoptericola dokdonensis	DS-3
GCF_000215105.1	Isoptericola variabilis	225
GCF_001889125.1	Janibacter indicus	YFY001
GCF_003721155.3	Janibacter melonis	M714
GCF_900105925.1	Jiangella alkaliphila	DSM 45079
GCF_900475835.1	Jonesia denitrificans	NCTC10816
GCF_001302585.1	Kibdelosporangium phytohabitans	KLBMP1111
GCF_000017305.1	Kineococcus radiotolerans	SRS30216 = ATCC BAA-149
GCF_002082585.1	Kitasatospora albolonga	YIM 101047
GCF_002082605.1	Kitasatospora aureofaciens	DM-1
GCF_000269985.1	Kitasatospora setae	KM-6054
GCF_001482365.1	Kocuria flava	HO-9041
GCF_004328535.1	Kocuria indica	CE7
GCF_001275345.1	Kocuria palustris	MU14/1
GCF_001580365.1	Kocuria turfanensis	HO-9042
GCF_000024345.1	Kribbella flavida	DSM 17836
GCF_014217565.1	Kribbella qitaiheensis	SPB151
GCF_000525635.1	Kutzneria albida	DSM 43870
GCF_000024225.1	Lancefieldella parvulum	DSM 20469
GCF_001293125.1	Lawsonella clevelandensis	X1036
GCF_000470775.1	Leifsonia xyli subsp. cynodontis	DSM 46306
GCF_001701025.1	Lentzea guizhouensis	DHS C013
GCF_011382985.1	Leucobacter coleopterorum	HDW9A
GCF_014396385.1	Leucobacter denitrificans	KACC 14055
GCF_011382965.1	Leucobacter insecticola	HDW9B
GCF_004028235.1	Leucobacter muris	DSM 101948
GCF_004208635.1	Leucobacter triazinivorans	JW-1
GCF_011299575.1	Leucobacter viscericola	HDW9C
GCF_009429125.1	Luteimicrobium xylanilyticum	HY-24
GCF_001190945.1	Luteipulveratus mongoliensis	MN07-A0370
GCF_009930795.1	Marisediminicola antarctica	ZS314
GCF_900104965.1	Marmoricola scoriae	DSM 22127
GCF_011046975.1	Microbacterium amylolyticum	DSM 24221
GCF_015277815.1	Microbacterium atlanticum	WY121
GCF_001974985.1	Microbacterium aurum	KACC 15219
GCF_021398715.1	Microbacterium binotii	Au-Mic3
GCF_008727755.1	Microbacterium caowuchunii	ST-M6
GCF_011751765.2	Microbacterium chengjingii	HY60
GCF_015277855.1	Microbacterium cremeum	NY27
GCF_011047135.1	Microbacterium endophyticum	DSM 27099
GCF_011751745.2	Microbacterium fandaimingii	HY82
GCF_003367705.1	Microbacterium foliorum	NRRL B-24224
GCF_014725695.1	Microbacterium hominis	01094
GCF_003991875.1	Microbacterium lemovicicum	Viu22
GCF_008727775.1	Microbacterium lushaniae	L-031
GCF_015277875.1	Microbacterium luteum	A18JL200
GCF_001975955.2	Microbacterium oleivorans	A9
GCF_009735645.1	Microbacterium oryzae	MB-10
GCF_001887285.1	Microbacterium paludicola	CC3
GCF_900105335.1	Microbacterium paraoxydans	DSM 15019
GCF_004135285.1	Microbacterium protaetiae	DFW100M-13
GCF_900100885.1	Microbacterium pygmaeum	DSM 23142
GCF_021172025.1	Microbacterium resistens	MZT7
GCF_004564075.1	Microbacterium sediminis	YLB-01
GCF_004564355.1	Microbacterium wangchenii	dk512
GCF_012530535.1	Microcella flavibacter	WY83
GCF_019890915.1	Micrococcus luteus	CW.Ay
GCF_007362775.1	Microlunatus elymi	KUDC0627
GCF_000270245.1	Microlunatus phosphovorus	NM-1
GCF_900105785.1	Microlunatus sagamiharensis	DSM 21743
GCF_900105385.1	Microlunatus soli	DSM 21800
GCF_000145235.1	Micromonospora aurantiaca	ATCC 27029
GCF_900089595.1	Micromonospora auratinigra	DSM 44815
GCF_013389765.1	Micromonospora carbonacea	aurantiaca
GCF_900091505.1	Micromonospora chokoriensis	DSM 45160
GCF_900091455.1	Micromonospora coriariae	DSM 44875
GCF_900090295.1	Micromonospora coxensis	DSM 45161
GCF_014764405.1	Micromonospora craniellae	LHW63014
GCF_900090235.1	Micromonospora echinaurantiaca	DSM 43904
GCF_900091445.1	Micromonospora echinofusca	DSM 43913
GCF_900091495.1	Micromonospora echinospora	DSM 43816
GCF_013694245.1	Micromonospora ferruginea	28ISP2-46
GCF_900090285.1	Micromonospora inositola	DSM 43819
GCF_900091425.1	Micromonospora krabiensis	DSM 45344
GCF_000204155.1	Micromonospora maris	AB-18-032
GCF_900089605.1	Micromonospora narathiwatensis	DSM 45248
GCF_900091515.1	Micromonospora purpureochromogenes	DSM 43821
GCF_900090265.1	Micromonospora rifamycinica	DSM 44983
GCF_900090305.1	Micromonospora siamensis	DSM 45097
GCF_009671205.1	Micromonospora terminaliae	DSM 101760
GCF_003612775.1	Micromonospora tulbaghiae	CNY-010
GCF_900091545.1	Micromonospora viridifaciens	DSM 43909
GCF_900090275.1	Micromonospora zamorensis	DSM 45600
GCF_900289045.1	Micropruina glycogenica	1
GCF_900104895.1	Microterricola viridarii	DSM 21772
GCF_018141525.1	Miltoncostaea marina	SCSIO 60955
GCF_018141545.1	Miltoncostaea oceani	SCSIO 61214
GCF_000196535.1	Mobiluncus curtisii	ATCC 43063
GCF_020424085.1	Mycetocola spongiae	MSC19
GCF_003065425.1	Mycetocola zhujimingii	449 = CGMCC 1.16372
GCF_900292015.1	Mycobacterium basiliense	901379
GCF_010728725.1	Mycobacterium branderi	JCM 12687
GCF_000253375.1	Mycobacterium canettii	CIPT 140010059
GCF_010730195.1	Mycobacterium conspicuum	JCM 14738
GCF_010727945.1	Mycobacterium cookii	JCM 12404
GCF_022370635.1	Mycobacterium crocinum	JCM 16369
GCF_019456655.1	Mycobacterium diernhoferi	ATCC 19340
GCF_002157835.1	Mycobacterium dioxanotrophicus	PH-06
GCF_010728155.1	Mycobacterium doricum	JCM 12405
GCF_010730355.1	Mycobacterium florentinum	JCM 14740
GCF_012223425.1	Mycobacterium frederiksbergense	LB 501T
GCF_022370755.1	Mycobacterium goodii	ATCC 700504
GCF_008329645.1	Mycobacterium grossiae	DSM 104744
GCF_000340435.2	Mycobacterium haemophilum	ATCC 29548
GCF_016861545.1	Mycobacterium heckeshornense	JMUB5695
GCF_010730745.1	Mycobacterium heidelbergense	JCM 14842
GCF_019645835.1	Mycobacterium holsaticum	JCM 12374
GCF_000277125.1	Mycobacterium intracellulare	ATCC 13950
GCF_000157895.3	Mycobacterium kansasii	ATCC 12478
GCF_010731835.1	Mycobacterium koreense	JCM 19956
GCF_014263315.1	Mycobacterium kubicae	NJH_MKUB1
GCF_010731535.1	Mycobacterium lacus	JCM 15657
GCF_003253775.1	Mycobacterium leprae	MRHRU-235-G
GCF_000975265.2	Mycobacterium lepromatosis	FJ924
GCF_019645855.1	Mycobacterium malmoense	ATCC 29571
GCF_010731775.1	Mycobacterium mantenii	JCM 18113
GCF_016745295.1	Mycobacterium marinum	MMA1
GCF_002285715.1	Mycobacterium marseillense	FLAC0026
GCF_010731635.1	Mycobacterium noviomagense	JCM 16367
GCF_010726505.1	Mycobacterium novum	JCM 6391
GCF_021183725.1	Mycobacterium ostraviense	FDAARGOS_1613
GCF_019456675.1	Mycobacterium pallens	JCM 16370
GCF_003614435.1	Mycobacterium paragordonae	49061
GCF_016756055.1	Mycobacterium paraintracellulare	M011
GCF_010731655.1	Mycobacterium paraseoulense	JCM 16952
GCF_022430545.1	Mycobacterium paraterrae	DSM 45127
GCF_010730575.1	Mycobacterium parmense	JCM 14742
GCF_003584745.1	Mycobacterium pseudoshottsii	JCM 15466
GCF_022374875.1	Mycobacterium rufum	JCM 16372
GCF_019645875.1	Mycobacterium senegalense	ATCC 35796
GCF_010731595.1	Mycobacterium seoulense	JCM 16018
GCF_002356315.1	Mycobacterium shigaense	JCM 32072
GCF_010730055.1	Mycobacterium shinjukuense	JCM 14233
GCF_010728525.1	Mycobacterium shottsii	JCM 12657
GCF_010727605.1	Mycobacterium simiae	JCM 12377
GCF_018278905.1	Mycobacterium spongiae	FSD4b-SM
GCF_010731715.1	Mycobacterium stomatepiae	JCM 17783
GCF_000195955.2	Mycobacterium tuberculosis	H37Rv
GCF_020616615.1	Mycobacterium ulcerans	JKD8049
GCF_013466425.1	Mycobacterium vicinigordonae	24
GCF_022374935.1	Mycobacterium virginiense	DSM 100883
GCF_004028015.1	Mycobacteroides abscessus	GZ002
GCF_001632805.1	Mycobacteroides chelonae	CCUG 47445
GCF_001605725.1	Mycobacteroides immunogenum	CCUG 47286
GCF_004924335.1	Mycobacteroides salmoniphilum	DSM 43276
GCF_001456355.1	Mycobacteroides saopaulense	EPM10906
GCF_022370835.1	Mycolicibacillus parakoreensis	DSM 45575
GCF_010729485.1	Mycolicibacter hiberniae	JCM 13571
GCF_010731755.1	Mycolicibacter minnesotensis	JCM 17932
GCF_000214155.1	Mycolicibacter sinensis	JDM601
GCF_900187145.1	Mycolicibacter terrae	NCTC10856
GCF_010726245.1	Mycolicibacterium aichiense	JCM 6376
GCF_010727325.1	Mycolicibacterium alvei	JCM 12272
GCF_010731855.1	Mycolicibacterium anyangense	JCM 30275
GCF_010731815.2	Mycolicibacterium arabiense	JCM 18538
GCF_900637195.1	Mycolicibacterium aurum	NCTC10437
GCF_016919645.1	Mycolicibacterium austroafricanum	MYC221
GCF_016313185.1	Mycolicibacterium baixiangningiae	LJ126
GCF_010731295.1	Mycolicibacterium boenickei	JCM 15653
GCF_010731795.1	Mycolicibacterium celeriflavum	JCM 18439
GCF_900637205.1	Mycolicibacterium chitae	NCTC10485
GCF_010729895.1	Mycolicibacterium confluentis	JCM 13671
GCF_010726645.1	Mycolicibacterium duvalii	JCM 6396
GCF_010726955.1	Mycolicibacterium fallax	JCM 6405
GCF_019739075.1	Mycolicibacterium farcinogenes	BKK/CU-MFGFA-001
GCF_014295435.1	Mycolicibacterium fluoranthenivorans	2A
GCF_001307545.1	Mycolicibacterium fortuitum	CT6
GCF_010728925.1	Mycolicibacterium gadium	JCM 12688
GCF_000184435.1	Mycolicibacterium gilvum	Spyr1
GCF_900603025.1	Mycolicibacterium hassiacum	DSM 44199; Mhassiacum
GCF_010731895.1	Mycolicibacterium helvum	JCM 30396
GCF_010731615.1	Mycolicibacterium insubricum	JCM 16366
GCF_010731695.1	Mycolicibacterium litorale	JCM 17423
GCF_010729665.1	Mycolicibacterium madagascariense	JCM 13574
GCF_010727475.1	Mycolicibacterium mageritense	JCM 12375
GCF_015710575.1	Mycolicibacterium mengxianglii	Z-34
GCF_010731575.1	Mycolicibacterium monacense	JCM 15658
GCF_010726085.1	Mycolicibacterium moriokaense	JCM 6375
GCF_005670685.2	Mycolicibacterium mucogenicum	DSM 44124
GCF_018363015.1	Mycolicibacterium neoaurum	MN2019
GCF_003855255.1	Mycolicibacterium nivoides	DL90
GCF_010725485.1	Mycolicibacterium parafortuitum	JCM 6367
GCF_010731115.1	Mycolicibacterium phocaicum	JCM 15301
GCF_010728325.1	Mycolicibacterium poriferae	JCM 12603
GCF_010729305.1	Mycolicibacterium psychrotolerans	JCM 13323
GCF_010725725.1	Mycolicibacterium pulveris	JCM 6370
GCF_900108565.1	Mycolicibacterium rutilum	DSM 45405
GCF_010731875.1	Mycolicibacterium sarraceniae	JCM 30395
GCF_010731735.1	Mycolicibacterium sediminis	JCM 17899
GCF_016919345.1	Mycolicibacterium septicum	PDNC012
GCF_013349145.1	Mycolicibacterium smegmatis	FDAARGOS_679
GCF_900187065.1	Mycolicibacterium thermoresistibile	NCTC10409
GCF_010725885.1	Mycolicibacterium tokaiense	JCM 6373
GCF_001655245.1	Mycolicibacterium vaccae	95051
GCF_000015305.1	Mycolicibacterium vanbaalenii	PYR-1
GCF_003860405.1	Nakamurella antarctica	S14-144
GCF_000024365.1	Nakamurella multipartite	DSM 44233
GCF_900104535.1	Nakamurella panacisegetis	P4-7,KCTC 19426,CECT 7604
GCF_016925535.1	Natronoglycomyces albus	DSM 106290
GCF_016925615.1	Natronosporangium hydrolyticum	DSM 106523
GCF_001887245.1	Neomicrococcus aestuarii	B18
GCF_900637185.1	Nocardia asteroids	NCTC11293
GCF_002209125.2	Nocardia brasiliensis	FDAARGOS_352
GCF_000284035.1	Nocardia cyriacigeorgica	GUH-2
GCF_000009805.1	Nocardia farcinica	IFM 10152
GCF_021183645.1	Nocardia gipuzkoensis	FDAARGOS_1619
GCF_013744875.1	Nocardia huaxiensis	WCH-YHL-001
GCF_019222765.1	Nocardia iowensis	NRRL 5646
GCF_001886715.1	Nocardia mangyaensis	Y48
GCF_007362295.1	Nocardia otitidiscaviarum	NEB252
GCF_002356035.1	Nocardia seriolae	UTF1
GCF_018362975.1	Nocardia tengchongensis	CFH S0057
GCF_002568625.1	Nocardia terpenica	NC_YFY_NT001
GCF_014466955.1	Nocardia wallacei	FMUON74
GCF_021183565.1	Nocardia yamanashiensis	FDAARGOS_1623
GCF_003626895.1	Nocardia yunnanensis	CFH S0054
GCF_011046535.1	Nocardioides anomalus	HKS04
GCF_018459925.1	Nocardioides aquaticus	KCTC 9944
GCF_017309995.1	Nocardioides aromaticivorans	IC177
GCF_003945325.1	Nocardioides baekrokdamisoli	KCTC 39748
GCF_019880385.1	Nocardioides coralli	SCSIO 67246
GCF_008761635.1	Nocardioides cynanchi	SB3-45
GCF_001653335.1	Nocardioides dokdonensis	FR1436
GCF_014127485.1	Nocardioides dongkuii	S-713
GCF_004564375.1	Nocardioides euryhalodurans	MMS17-SY117
GCF_006494775.1	Nocardioides humi	DCY24
GCF_014395785.1	Nocardioides mesophilus	KACC 16243
GCF_020991065.1	Nocardioides okcheonensis	MMS20-HV4-12
GCF_019448235.1	Nocardioides panacisoli	DP1N28-12
GCF_011300215.1	Nocardioides piscis	HDW12A
GCF_019931675.1	Nocardioides rotundus	MCCC 1A10561
GCF_006494815.1	Nocardioides sambongensis	KUDC 5002
GCF_004683965.1	Nocardioides seonyuensis	MMS17-SY207-3
GCF_013466985.1	Nocardioides ungokensis	LMG 28591
GCF_900638215.1	Nocardiopsis dassonvillei	NCTC10488
GCF_002263495.1	Nocardiopsis gilva	YIM 90087
GCF_019397265.1	Nonomuraea coxensis	DSM 45129
GCF_020215645.1	Nonomuraea gerenzanensis	L70
GCF_009497075.1	Nonomuraea nitratireducens	WYY166
GCF_900119915.1	Olsenella timonensis	Marseille-P2300
GCF_000143845.1	Olsenella uli	DSM 7084
GCF_003351765.1	Ornithinimicrobium avium	AMA3305
GCF_007197575.1	Ornithinimicrobium ciconiae	H23M54
GCF_004526345.1	Ornithinimicrobium flavum	CPCC 203535
GCF_008843165.1	Ornithinimicrobium pratense	W204
GCF_021919345.1	Paenarthrobacter nicotinovorans	ATCC 49919
GCF_016694995.1	Paenarthrobacter ureafaciens	CZY1
GCF_900105025.1	Parafannyhessea umbonata	DSM 22620
GCF_900105445.1	Paraoerskovia marina	DSM 22126
GCF_001042675.1	Parascardovia denticolens	DSM 10105 = JCM 12538
GCF_003966955.1	Parolsenella catena	JCM 31932
GCF_900143685.1	Parolsenella massiliensis	Marseille-P3237
GCF_001746855.1	Pauljensenia hongkongensis	HKU8
GCF_900104525.1	Pedococcus dokdonensis	DSM 22329
GCF_017569225.1	Pengzhenrongella sicca	LRZ-2
GCF_900169485.1	Phoenicibacter congonensis	Marseille-P3241
GCF_011764545.1	Phytohabitans flavus	NBRC 107702
GCF_011764565.1	Phytohabitans suffuscus	NBRC 105367
GCF_000785495.1	Pimelobacter simplex	VKM Ac-2033D
GCF_018324255.1	Polymorphospora rubra	NBRC 101157
GCF_002950575.1	Pontimonas salivibrio	CL-TW6
GCF_002240355.1	Prauserella marina	DSM 45268
GCF_003798325.1	Propionibacterium acidifaciens	FDAARGOS_576
GCF_900637915.1	Propionibacterium australiense	NCTC13651
GCF_900087655.1	Propionibacterium freudenreichii	PFRJS14
GCF_011393335.1	Propioniciclava coleopterorum	HDW11
GCF_003627075.1	Protaetiibacter intestinalis	2DFWR-13
GCF_008365275.1	Protaetiibacter larvae	KACC 19322
GCF_000022025.1	Pseudarthrobacter chlorophenolicus	A6
GCF_900105535.1	Pseudarthrobacter equi	IMMIB L-1606
GCF_009911795.1	Pseudarthrobacter psychrotolerans	YJ56
GCF_019263705.2	Pseudonocardia abyssalis	KRD168
GCF_003945385.1	Pseudonocardia autotrophica	NBRC 12743
GCF_013155125.1	Pseudonocardia broussonetiae	Gen 01
GCF_000196675.2	Pseudonocardia dioxanivorans	CB1190
GCF_000950575.1	Psychromicrobium lacuslunae	IHBB 11108
GCF_009646095.1	Raineyella fluvialis	CBA3103
GCF_022845715.1	Raoultibacter timonensis	CE91-St30
GCF_009834205.1	Rathayibacter festucae	VKM Ac-2802
GCF_004011115.1	Rathayibacter iranicus	NCCPB 2253
GCF_004011095.1	Rathayibacter rathayi	DSM 7485
GCF_009834165.1	Rathayibacter tanaceti	VKM Ac-2761
GCF_018800825.1	Rathayibacter toxicus	WAC7056
GCF_001641005.1	Rathayibacter tritici	NCPPB 1953
GCF_000018885.1	Renibacterium salmoninarum	ATCC 33209
GCF_021165915.1	Rhodococcus aetherivorans	CBO21-1
GCF_900478115.1	Rhodococcus coprophilus	NCTC10994
GCF_003013675.1	Rhodococcus equi	DSSKP-R-001
GCF_000696675.2	Rhodococcus erythropolis	R138
GCF_001620305.1	Rhodococcus fascians	D188
GCF_019334125.1	Rhodococcus globerulus	D757
GCF_017068375.1	Rhodococcus koreensis	R85
GCF_020542785.1	Rhodococcus opacus	PD630
GCF_000511305.1	Rhodococcus pyridinivorans	SB3094
GCF_015099595.1	Rhodococcus qingshengii	CS98
GCF_003004765.2	Rhodococcus rhodochrous	EP4
GCF_016804345.1	Rhodococcus ruber	C1
GCF_014217765.1	Rhodococcus triatomae	DSM 44893
GCF_000699505.1	Rhodoluna lacicola	MWH-Ta8
GCF_005845345.1	Rhodoluna limnophila	1B-Mac
GCF_900637985.1	Rothia aeria	NCTC10207
GCF_014705945.2	Rothia amarae	KJZ-9
GCF_000164695.2	Rothia dentocariosa	ATCC 17931
GCF_014217215.1	Rothia nasimurium	E1706032
GCF_014705925.2	Rothia terrae	KJZ-14
GCF_014960965.1	Ruania alkalisoli	RN3S43
GCF_008000995.1	Ruania zhangjianzhongii	HY168
GCF_003568865.1	Rubrobacter indicoceani	SCSIO 08198
GCF_011492965.1	Rubrobacter marinus	SCSIO 52915
GCF_011492945.1	Rubrobacter tropicus	SCSIO 52909
GCF_000014185.1	Rubrobacter xylanophilus	DSM 9941
GCF_000231055.2	Saccharomonospora azurea	NA-128
GCF_000244975.1	Saccharomonospora cyanea	NA-134
GCF_000243395.2	Saccharomonospora glauca	K62
GCF_000244955.1	Saccharomonospora marina	XMU15
GCF_000023865.1	Saccharomonospora viridis	DSM 43017
GCF_000062885.1	Saccharopolyspora erythraea	NRRL 2338
GCF_022828475.1	Saccharopolyspora gregorii	MLY014
GCF_014697215.1	Saccharopolyspora pogona	NRRL30141
GCF_014490055.1	Saccharopolyspora spinosa	CCTCC M206084
GCF_000328705.1	Saccharothrix espanaensis	type strain: DSM 44229
GCF_009498035.1	Saccharothrix syringae	NRRL B-16468
GCF_000016425.1	Salinispora tropica	CNB-440
GCF_000024925.1	Sanguibacter keddieii	DSM 10542
GCF_001042695.1	Scardovia inopinata	JCM 12537
GCF_005886435.1	Schaalia cardiffensis	F0333
GCF_016127995.1	Schaalia meyeri	FDAARGOS_985
GCF_000092825.1	Segniliparus rotundus	DSM 44985
GCF_006337125.1	Serinicoccus chungangensis	CCUG 59777
GCF_001685415.1	Serinicoccus hydrothermalis	JLT9
GCF_019285775.1	Skermania piniformis	DSM 43998
GCF_900637575.1	Slackia heliotrinireducens	NCTC11029
GCF_018437505.1	Spiractinospora alimapuensis	VN6-2
GCF_000024545.1	Stackebrandtia nassauensis	DSM 44728
GCF_003258605.2	Streptacidiphilus bronchialis	DSM 106435
GCF_004323735.1	Streptomonospora litoralis	M2
GCF_000359525.1	Streptomyces albidoflavus	J1074
GCF_008704395.1	Streptomyces alboniger	ATCC 12461
GCF_018141485.1	Streptomyces alfalfa	XN-04
GCF_001267885.1	Streptomyces ambofaciens	ATCC 23877
GCF_019933235.1	Streptomyces angustmyceticus	JCM 4053
GCF_020783455.1	Streptomyces anulatus	YINM00001
GCF_003955715.1	Streptomyces aquilus	GGCR-6
GCF_003355155.1	Streptomyces armeniacus	ATCC 15676
GCF_003330865.1	Streptomyces atratus	SCSIO_ZH16
GCF_014701115.1	Streptomyces aurantiacus	JCM 4677
GCF_000280865.2	Streptomyces auratus	AGR0001
GCF_000009765.2	Streptomyces avermitilis	MA-4680 = NBRC 14893
GCF_015910445.1	Streptomyces bathyalis	ASO4wet
GCF_009796285.1	Streptomyces broussonetiae	T44
GCF_014295035.1	Streptomyces buecherae	AC541
GCF_003261055.1	Streptomyces cadmiisoli	ZFG47
GCF_016906185.1	Streptomyces californicus	FDAARGOS_1209
GCF_006716135.1	Streptomyces calvus	DSM 41452
GCF_000237305.1	Streptomyces cattleya	NRRL 8057 = DSM 46488
GCF_002804165.1	Streptomyces cavourensis	1AS2a
GCF_008704715.1	Streptomyces chartreusis	ATCC 14922
GCF_015160875.1	Streptomyces chromofuscus	DSM 40273
GCF_009299385.1	Streptomyces cinereoruber	ATCC 19740
GCF_015767775.1	Streptomyces clavuligerus	F1D7
GCF_008705135.1	Streptomyces coeruleorubidus	ATCC 13740
GCF_000444875.1	Streptomyces collinus	Tu 365
GCF_003963535.1	Streptomyces cyaneochromogenes	MK-45
GCF_017526105.1	Streptomyces cyanogenus	S136
GCF_003675325.1	Streptomyces dangxiongensis	Z022
GCF_000349325.1	Streptomyces davaonensis	JCM 4913
GCF_022385335.1	Streptomyces deccanensis	KCTC 19241
GCF_019880305.1	Streptomyces decoyicus	NRRL 2666
GCF_002946835.1	Streptomyces dengpaensis	XZHG99
GCF_009498275.1	Streptomyces fagopyri	QMT-28
GCF_015160855.1	Streptomyces ferrugineus	CCTCC AA2014009
GCF_009739905.1	Streptomyces ficellus	NRRL 8067
GCF_001735805.1	Streptomyces fodineus	TW1S1
GCF_022647665.1	Streptomyces formicae	1H-GS9
GCF_008704425.1	Streptomyces fradiae	ATCC 10745 = DSM 40063
GCF_003665435.1	Streptomyces fungicidicus	TXX3120
GCF_008704575.1	Streptomyces galilaeus	ATCC 14969
GCF_015710995.1	Streptomyces gardneri	ATCC 15439
GCF_014489615.1	Streptomyces genisteinicus	CRPJ-33
GCF_002082195.1	Streptomyces gilvosporeus	F607
GCF_003325375.1	Streptomyces globosus	LZH-48
GCF_021216675.1	Streptomyces gobiensis	1_25
GCF_001542625.1	Streptomyces griseochromogenes	ATCC 14511
GCF_014673495.1	Streptomyces griseofuscus	DSM 40191
GCF_003595235.1	Streptomyces griseorubiginosus	3E-1
GCF_003994395.1	Streptomyces griseoviridis	F1-27
GCF_000010605.1	Streptomyces griseus subsp. griseus	NBRC 13350
GCF_013364095.1	Streptomyces harbinensis	NA02264
GCF_004803895.1	Streptomyces hawaiiensis	ATCC 12236
GCF_021028635.1	Streptomyces huasconensis	D23
GCF_003627815.1	Streptomyces hundungensis	BH38
GCF_001027185.1	Streptomyces incarnatus	Taxonomy ID: 665007
GCF_022221585.1	Streptomyces inhibens	NRRL30439
GCF_008704495.1	Streptomyces kanamyceticus	ATCC 12853
GCF_016803985.1	Streptomyces koyangensis	SCSIO 5802
GCF_018255875.1	Streptomyces lavendulae subsp. lavendulae	Del-LP
GCF_001013905.1	Streptomyces leeuwenhoekii	C34 (= DSM 42122 = NRRL B-24963)
GCF_011694815.1	Streptomyces liangshanensis	QMT-12
GCF_016598615.1	Streptomyces liliifuscus	ZYC-3
GCF_003344445.1	Streptomyces lincolnensis	LC-G
GCF_001984445.1	Streptomyces lydicus	23
GCF_002128305.1	Streptomyces marincola	SCSIO 03032
GCF_013364315.1	Streptomyces microflavus	NA06532
GCF_020099395.1	Streptomyces mobaraensis	DSM 40587
GCF_016467295.1	Streptomyces murinus	Am1
GCF_003074055.1	Streptomyces nigra	452
GCF_008704555.1	Streptomyces nitrosporeus	ATCC 12769
GCF_000497425.1	Streptomyces niveus	NCIMB 11891
GCF_017352335.1	Streptomyces nodosus	ZJB2016050
GCF_017639205.1	Streptomyces nojiriensis	JCM 3382
GCF_015244315.1	Streptomyces olivaceus	SCSIO T05
GCF_003391135.1	Streptomyces olivoreticuli subsp. olivoreticuli	ATCC 31159
GCF_003344965.1	Streptomyces paludis	GSSD-12
GCF_001660045.1	Streptomyces parvulus	2297
GCF_009184865.1	Streptomyces phaeolivaceus	GY16
GCF_008704855.1	Streptomyces platensis	ATCC 23948
GCF_000802245.2	Streptomyces pluripotens	MUSC 135
GCF_008704445.1	Streptomyces prasinus	ATCC 13879
GCF_016804005.1	Streptomyces pratensis	S10
GCF_001278075.1	Streptomyces pristinaespiralis	HCCB 10218
GCF_001611795.1	Streptomyces qaidamensis	S10
GCF_007856155.1	Streptomyces qinzhouensis	SSL-25
GCF_013394065.1	Streptomyces rectiverticillatus	B15-08
GCF_000331185.2	Streptomyces rimosus subsp. rimosus	ATCC 10970
GCF_014489635.1	Streptomyces roseirectus	CRXT-G-22
GCF_000497445.1	Streptomyces roseochromogenus subsp. oscitans	DS 12.976
GCF_000091305.1	Streptomyces scabiei	87.22
GCF_004328625.1	Streptomyces seoulensis	KCTC 9819
GCF_015689475.1	Streptomyces solisilvae	HNM0141
GCF_008704795.1	Streptomyces spectabilis	ATCC 27465
GCF_008704535.1	Streptomyces subrutilus	ATCC 27467
GCF_000154965.1	Streptomyces sviceus	ATCC 29083
GCF_003097515.1	Streptomyces tirandamycinicus	HNM0039
GCF_003932715.1	Streptomyces tsukubensis	NRRL 18488
GCF_014701095.1	Streptomyces tuirus	JCM 4255
GCF_001886595.1	Streptomyces venezuelae	NRRL B-65442
GCF_000830005.1	Streptomyces vietnamensis	GIM4.0001
GCF_008704935.1	Streptomyces vinaceus	ATCC 27476
GCF_002082175.1	Streptomyces violaceoruber	S21
GCF_008704515.1	Streptomyces viridosporus	T7A; ATCC 39115
GCF_014621695.1	Streptomyces xanthii	CRXT-Y-14
GCF_000993785.3	Streptomyces xiamenensis	318
GCF_000220705.2	Streptomyces xinghaiensis	S187
GCF_018069625.1	Streptomyces yatensis	DSM 41771
GCF_000024865.1	Streptosporangium roseum	DSM 43021
GCF_001997345.1	Tessaracoccus aquimaris	NSG39
GCF_014489575.1	Tessaracoccus defluvii	JCM 17540
GCF_001998865.1	Tessaracoccus flavescens	SST-39T
GCF_001997295.1	Tessaracoccus flavus	RP1
GCF_900659885.1	Tessaracoccus lapidicaptus	TLA_E
GCF_900343145.1	Tessaracoccus timonensis	Marseille-P5995
GCF_023208015.1	Thermobifida alba	DSM 43795
GCF_015034585.1	Thermobifida fusca	UPMC 901
GCF_003574835.2	Thermobifida halotolerans	DSM 44931
GCF_017161365.1	Thermobispora bispora	ZC4
GCF_003589885.1	Thermomonospora amylolytica	YIM 77502
GCF_000024385.1	Thermomonospora curvata	DSM 43183
GCF_015277515.1	Thermophilibacter immobilis	LZLJ-2
GCF_007559025.1	Tomitella fengzijianii	HY188
GCF_014126825.1	Tomitella gaofuii	HY172
GCF_000196075.1	Tropheryma whipplei	TW08/27
GCF_900637955.1	Trueperella bialowiezensis	NCTC13354
GCF_017603605.1	Trueperella pecoris	15IMD0307
GCF_000612055.1	Trueperella pyogenes	TP6375
GCF_000092225.1	Tsukamurella paurometabola	DSM 20162
GCF_016919465.1	Tsukamurella tyrosinosolvens	PDNC001
GCF_900155645.1	Vaginimicrobium propionicum	Marseille-P3275
GCF_004135345.1	Xylanimonas allomyrinae	2JSPR-7
GCF_000024965.1	Xylanimonas cellulosilytica	DSM 15894
GCF_004135385.1	Xylanimonas protaetiae	FW10M-9
GCF_002356335.1	[Mycobacterium] stephanolepidis	NJB0901
*Genome sequences were obtained from NCBI GenBank database with the following filters: i) taxonomy: Actinobacteria (Taxonomy ID: 201174), ii) status: “Reference genomes”, and iii) assembly level: “chromosome” and “complete”.
